# Supplementary material
Source: PubMed Central journal article supplement (PMC3135908)
Supplement: NIHMS301887-supplement-1_si_001.pdf [file NIHMS301887-supplement-1_si_001.pdf]

Supporting Information

**Diversity-Oriented Synthesis of 2,4,6-Trisubstituted Piperidines  
via Type II Anion Relay Chemistry (ARC)**

Amos B. Smith, III,\* Heeoon Han, Won-Suk Kim

*Department of Chemistry, Monell Chemical Senses Center and Laboratory for Research  
on the Structure of Matter, University of Pennsylvania, Philadelphia, PA 19104, U.S.A.*

Table of Contents:

|                                                        |          |
|--------------------------------------------------------|----------|
| -General Methods and Experimental Procedures.....      | S2-S28   |
| - <sup>1</sup> H NMR, <sup>13</sup> C NMR Spectra..... | S29-S90  |
| -X-ray Data.....                                       | S91-S108 |

## I. Materials and Methods

Reactions were carried out in oven or flame-dried glassware under an argon atmosphere, unless otherwise noted. All solvents were reagent grade. Diethyl ether and THF were obtained from a Pure Solve TM PS-400. Reactions were magnetically stirred and monitored by thin layer chromatography (TLC) with 0.25 mm E. Merck precoated silica gel plates. In aqueous work-up, all organic solutions were dried over sodium sulfate or magnesium sulfate, and filtered prior to rotary evaporation at water aspirator pressure. Flash chromatography was performed with silica gel 60 (particle size 0.040 – 0.062 mm) supplied by Silicycle and Sorbent Technologies. Yields refer to chromatographically and spectroscopically pure compounds, unless otherwise stated. *t*-BuLi (1.7 M in hexane), *t*-BuOK (1.0 M in THF) were purchased from Aldrich. Infrared spectra were recorded on a Perkin-Elmer Model 283B spectrophotometer or a Jasco Model FT/IR-480 Plus spectrometer. <sup>1</sup>H and <sup>13</sup>C NMR spectra were recorded on a Bruker AMX-500 spectrometer. Chemical shifts are reported as  $\delta$  values relative to the internal chloroform ( $\delta$  7.27 ppm for <sup>1</sup>H and  $\delta$  77.16 ppm for <sup>13</sup>C). Optical rotations were measured on a Jasco Perkin-Elmer model 241 polarimeter. High resolution mass spectra were measured at the University of Pennsylvania Mass Spectrometry Service Center on either a VG Micromass 70/70 H or VG ZAB-E spectrometer. Jasco SFC was used for separation of some of the diastereomers using 4.6 mm  $\phi$   $\times$  250 mm CHIRALPAK<sup>®</sup> IC 5  $\mu$ m (Eluent: Isocratic CO<sub>2</sub>:*i*-PrOH = 67:33, Flow rate: 4 mL/min).

## II. Experimental Procedure:

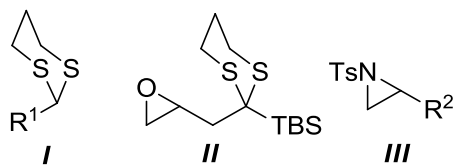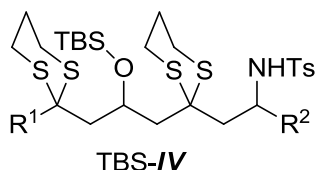

**1. General procedure for multi-component reaction (Type II ARC):** Reactions were carried out on the following scale, unless otherwise noted.

TBS-**IV** : A solution of dithiane **I** (0.050 mL, 0.74 mmol, 1.2 equiv) in THF (2.0 mL) was cooled to  $-78\text{ }^{\circ}\text{C}$  and treated with a 1.0 M solution of *t*-BuOK (0.78 mmol, 1.25 equiv) in THF and a 1.7 M solution of *t*-BuLi (0.78 mmol, 1.3 equiv) in hexane dropwise via syringe, successively. The resulting solution was stirred for 0.5 h. A solution of linchpin **II** (0.62 mmol, 1.0 equiv) in THF (2.0 mL) was added dropwise to the reaction mixture at  $-78\text{ }^{\circ}\text{C}$  via cannula. The resulting solution was stirred for 0.5 h. A solution of aziridine **III** (0.81 mmol, 1.3 equiv) in THF (2.0 mL) was added dropwise to the reaction mixture at  $-78\text{ }^{\circ}\text{C}$  via cannula. Then the reaction was warmed to  $0\text{ }^{\circ}\text{C}$  for 2 h with stirring. The resulting mixture was poured into saturated aqueous  $\text{NH}_4\text{Cl}$  (5.0 mL) and extracted with EtOAc (3 X 10 mL). The combined organic layers were washed with brine (5.0 mL), dried over  $\text{MgSO}_4$ , filtered, and concentrated in vacuo. Flash chromatography on silica gel (hexane/EtOAc = 20/1 to 3/1) provided TBS-**IV** as a pale yellow oil.

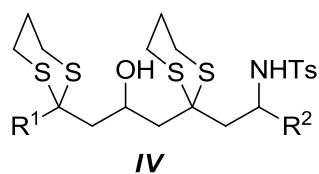

## 2. General procedure for TBS group removal.

**Method A** - A solution of TBS-**IV** in THF was treated with a 1.0 M solution of TBAF in THF (1.5 equiv), and stirred at room temperature for 12 h. The reaction mixture was concentrated in vacuo and flash chromatography on silica gel (hexane/EtOAc = 5/1 to 1/1) provided TBS-**IV**.

**Method B** - A solution of TBS-**IV** in MeOH was treated with a catalytic amount of concentrated HCl, and stirred at room temperature for 12 h. The reaction mixture was concentrated in vacuo and flash chromatography on silica gel (hexane/EtOAc = 5/1 to 1/1) provided **IV**.

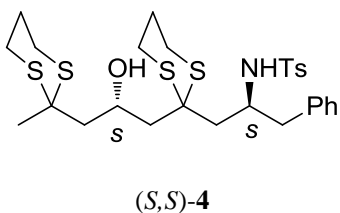

TBS-(*S,S*)-**4** : Following the general Type II ARC procedure, 2-methyl-1,3-dithiane **1a** (0.54 mL, 4.5 mmol, 1.2 equiv), linchpin (+)-**2** (1.1 g, 3.8 mmol, 1.0 equiv) and aziridine (+)-**3a** (1.4 g, 4.9 mmol, 1.3 equiv) afforded TBS-(*S,S*)-**4** (2.0 g, 2.8 mmol, 74% yield) as a pale yellow oil.

(*S,S*)-**4** : Following the general procedure for the TBS group removal (**Method A**), TBS-(*S,S*)-**4** (1.9 g, 2.6 mmol) afforded (*S,S*)-**4** (1.4 g, 2.3 mmol, 90% yield) as a pale yellow oil:  $R_f$  0.55 (hexane/EtOAc = 2:1);  $[\alpha]_D^{25} -2.78$  (c 1.00,

CHCl<sub>3</sub>); IR (film) 3179 (m, br), 3025 (w), 2923 (s), 1599 (w), 1494 (w), 1420 (m), 1326 (m), 1157 (s), 1090 (s), 908 (w), 754 (m), 703 (s) cm<sup>-1</sup>; <sup>1</sup>H NMR (500 MHz, CDCl<sub>3</sub>) δ 7.87 (d, *J* = 8.3 Hz, 2H), 7.31 (d, *J* = 8.0 Hz, 2H), 7.27 (d, *J* = 7.5 Hz, 2H), 7.22 (d, *J* = 6.9 Hz, 2H), 7.19 (t, *J* = 7.2 Hz, 1H), 4.38 (t, *J* = 10.0 Hz, 1H), 3.92 – 3.86 (m, 1H), 3.17 (dd, *J* = 6.5, 3.0 Hz, 1H), 3.16 – 3.14 (m, 2H), 3.14 – 3.11 (m, 1H), 3.07 (ddd, *J* = 14.3, 11.4, 2.6 Hz, 1H), 2.77 (ddd, *J* = 14.6, 5.4, 3.1 Hz, 2H), 2.62 – 2.51 (m, 2H), 2.48 (dd, *J* = 13.3, 10.7 Hz, 1H), 2.41 (s, 3H), 2.29 (d, *J* = 15.3 Hz, 1H), 2.23 (dd, *J* = 15.6, 9.3 Hz, 1H), 2.16 – 2.09 (m, 1H), 2.07 – 2.02 (m, 1H), 1.90 – 1.85 (m, 1H), 1.85 (dd, *J* = 14.8, 10.5 Hz, 1H), 1.72 – 1.66 (m, 1H), 1.63 – 1.50 (m, 4H), 1.58 (s, 3H), 1.43 (d, *J* = 15.1 Hz, 1H); <sup>13</sup>C NMR (125 MHz, CDCl<sub>3</sub>) δ 143.09, 139.44, 138.57, 130.05, 129.64, 128.59, 127.37, 126.61, 65.62, 53.35, 51.21, 47.34, 47.13, 44.28, 44.20, 38.26, 28.35, 26.93, 26.73, 25.96, 25.22, 24.79, 24.47, 21.66; HRMS (ES) *m/z* 598.1617 [(M+H)<sup>+</sup>; calcd for C<sub>28</sub>H<sub>40</sub>NO<sub>3</sub>S<sub>5</sub>: 598.1612].

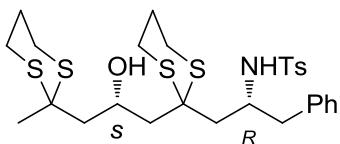

(*S,R*)-**4**

TBS-(*S,R*)-**4** : Following the Type II ARC general procedure, 2-methyl-1,3-dithiane **1a** (0.54 mL, 4.5 mmol, 1.2 equiv), linchpin (+)-**2** (1.1 g, 3.8 mmol, 1.0 equiv) and aziridine (–)-**3a** (1.27g, 4.9 mmol, 1.3 equiv) afforded TBS-(*S,R*)-**4** (1.9 g, 2.7 mmol, 69% yield) as a pale yellow oil.

(*S,R*)-**4** : Following the general procedure for TBS group removal (Method A), TBS-(*S,R*)-**4** (1.7 g, 2.3 mmol) afforded (*S,R*)-**4** (1.2 g, 2.0 mmol, 85% yield) as a pale yellow oil: *R*<sub>f</sub> 0.45 (hexane/EtOAc = 2:1); [α]<sub>D</sub><sup>25</sup> –31.21 (c 0.79, CHCl<sub>3</sub>); IR (film) 3277 (m, br), 3027 (w), 2923 (s), 1599 (w), 1495 (w), 1420 (m), 1327 (m), 1158 (s), 1091 (s), 908 (w), 737 (m), 666 (s) cm<sup>-1</sup>; <sup>1</sup>H NMR (500 MHz, CDCl<sub>3</sub>) δ 7.78 (d, *J* = 8.0 Hz, 2H), 7.31 (d, *J* = 8.0 Hz, 2H), 7.23 (dd, *J* = 8.0, 6.5 Hz, 2H), 7.19 (t, *J* = 8.0 Hz, 1H), 7.13 (d, *J* = 6.5 Hz, 2H), 5.44 (d, *J* = 5.0 Hz, 1H), 4.21–4.18 (m, 1H), 3.90 – 3.82 (m, 1H), 3.28 (brs, 1H), 2.97–2.89 (m, 3H), 2.86 – 2.76 (m, 3H), 2.73 – 2.67 (m, 2H), 2.59 (ddd, *J* = 14.0, 7.0, 3.5 Hz, 1H), 2.47 (ddd, *J* = 14.0, 8.0, 3.5 Hz, 2H), 2.43 (s, 3H), 2.25 (dd, *J* = 15.5, 4.0 Hz, 1H), 2.17 (dd, *J* = 15.5, 8.5 Hz, 1H), 2.15 (dd, *J* = 15.5, 9.5 Hz, 1H), 2.07 – 2.00 (m, 1H), 1.91 (dddd, *J* = 10.5, 10.5, 3.5, 3.5 Hz, 1H), 1.88 – 1.76 (m, 1H), 1.71 (dd, *J* = 15.5, 1.5 Hz, 1H), 1.71 – 1.64 (m, 2H), 1.60 (s, 3H); <sup>13</sup>C NMR (125 MHz, CDCl<sub>3</sub>) δ 143.42, 137.65, 137.47, 130.02, 129.76, 128.54, 127.74, 126.70, 66.07, 57.94, 51.22, 48.42, 47.93, 46.27, 42.79, 42.06, 28.70, 26.92, 26.77, 26.50, 26.08, 24.84, 24.68, 21.74; HRMS (ES) *m/z* 620.1445 [(M+Na)<sup>+</sup>; calcd for C<sub>28</sub>H<sub>39</sub>NO<sub>3</sub>S<sub>5</sub>Na: 620.1431].

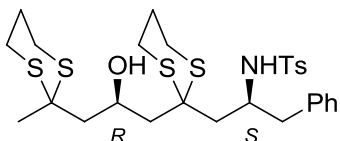

(*R,S*)-**4**

TBS-(*R,S*)-**4** : Following the Type II ARC general procedure, 2-methyl-1,3-dithiane **1a** (0.56 mL, 4.8 mmol, 1.2 equiv), linchpin (–)-**2** (1.17 g, 4.0 mmol, 1.0 equiv) and aziridine (+)-**3a** (1.5 g, 5.2 mmol, 1.3 equiv) afforded TBS-(*S,R*)-**4** (2.0 g, 2.8 mmol, 69% yield) as a pale yellow oil.

(*R,S*)-**4** : Following the general procedure for TBS group removal (Method B), TBS-(*R,S*)-**4** (2.0 g, 2.8 mmol) afforded (*R,S*)-**4** (1.5 g, 2.4 mmol, 88% yield) as a pale yellow oil:  $R_f$  0.45 (hexane/EtOAc = 2:1);  $[\alpha]_D^{24}$  +25.75 (c 0.79, CHCl<sub>3</sub>); IR, <sup>1</sup>H and <sup>13</sup>C NMR are identical to those of (*S,R*)-**4**; HRMS (ES)  $m/z$  598.1617 [(M+H)<sup>+</sup>; calcd for C<sub>28</sub>H<sub>39</sub>NO<sub>3</sub>S<sub>5</sub>: 598.1612].

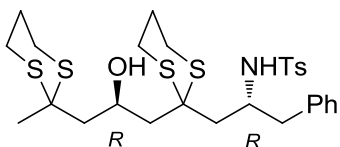

(*R,R*)-**4**.

TBS-(*R,R*)-**4** : Following the Type II ARC general procedure, 2-methyl-1,3-dithiane **1a** (0.578mL, 4.82mmol, 1.10 equiv), linchpin (–)-**2** (1.2 g, 4.0 mmol, 1.0 equiv) and aziridine (–)-**3a** (1.5 g, 5.2 mmol, 1.3 equiv) afforded TBS-(*S,R*)-**4** (2.1 g, 3.0 mmol, 74% yield) as a pale yellow oil.

(*R,R*)-**4** : Following the general procedure for TBS group removal (Method A), TBS-(*R,R*)-**4** (2.0 g, 2.7 mmol) afforded (*R,R*)-**4** (1.5 g, 2.5 mmol, 92% yield) as a pale yellow oil:  $R_f$  0.55 (hexane/EtOAc = 2:1);  $[\alpha]_D^{28}$  +3.01 (c 1.00, CHCl<sub>3</sub>); IR, <sup>1</sup>H and <sup>13</sup>C NMR are identical to those of (*S,S*)-**4**; HRMS (ES)  $m/z$  618.1051 [(M+Cl)<sup>–</sup>; calcd for C<sub>27</sub>H<sub>37</sub>ClNO<sub>3</sub>NS<sub>5</sub>: 618.1066].

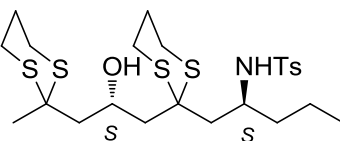

(*S,S*)-**5**.

TBS-(*S,S*)-**5** : Following the Type II ARC general procedure, 2-methyl-1,3-dithiane **1a** (0.050 mL, 0.42 mmol, 1.5 equiv), linchpin (+)-**2** (81 mg, 0.28 mmol, 1.0 equiv) and aziridine (+)-**3b** (130 mg, 0.56 mmol, 2.0 equiv) afforded TBS-(*S,S*)-**5** (110 mg, 0.17 mmol, 61% yield) as a pale yellow oil.

(*S,S*)-**5** : Following the general procedure for TBS group removal (Method A), TBS-(*S,S*)-**5** (110 mg, 0.16 mmol) afforded (*S,S*)-**5** (80 mg, 0.15 mmol, 92% yield) as a pale yellow oil:  $R_f$  0.33 (hexane/EtOAc = 2:1);  $[\alpha]_D^{28}$  -8.83 (c 0.80, CHCl<sub>3</sub>); IR (film) 3180 (m, br), 2924 (s), 1599 (w), 1421 (m), 1325 (m), 1157 (s), 1092 (s), 814 (m), 755 (m), 665 (m) cm<sup>-1</sup>; <sup>1</sup>H NMR (500 MHz, CDCl<sub>3</sub>)  $\delta$  7.78 (d,  $J$  = 8.3 Hz, 2H), 7.27 (d,  $J$  = 8.0 Hz, 2H), 4.38 (t,  $J$  = 10.0 Hz, 1H), 3.76 (td,  $J$  = 9.6, 4.6 Hz, 1H), 3.18 (ddd,  $J$  = 14.3, 11.6, 2.6 Hz, 1H), 3.10 (ddd,  $J$  = 14.2, 8.9, 2.6 Hz, 1H), 2.82 -2.68 (m, 6H), 2.65 (dd,  $J$  = 15.0, 10.0 Hz, 1H), 2.41 (s, 3H), 2.34 (dd,  $J$  = 15.4, 9.8 Hz, 1H), 2.15 – 2.06 (m, 3H), 1.96 – 1.90 (m, 2H), 1.89 – 1.80 (m, 1H), 1.71 (d,  $J$  = 15.3 Hz, 1H), 1.63 (dd,  $J$  = 14.9, 0.9 Hz, 1H), 1.61 (s, 3H), 1.43 – 1.36 (m, 2H), 1.33 – 1.16 (m, 4H), 0.77 (t,  $J$  = 7.3 Hz, 3H); <sup>13</sup>C NMR (125 MHz, CDCl<sub>3</sub>)  $\delta$  142.87, 139.53, 129.48, 127.30, 66.76, 51.62, 50.41, 47.22, 47.18, 42.85, 41.43, 39.27, 28.31, 26.89, 26.70, 26.19, 26.17, 25.44, 24.50, 21.66, 17.76, 14.11; HRMS (ES)  $m/z$  572.1418 [(M+Na)<sup>+</sup>; C<sub>24</sub>H<sub>39</sub>NO<sub>3</sub>S<sub>5</sub>Na: 572.1431].

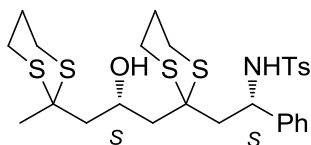

(*S,S*)-**6**

TBS-(*S,S*)-**6** : Following the Type II ARC general procedure, 2-methyl-1,3-dithiane **1a** (0.050 mL, 0.42 mmol, 1.5 equiv), linchpin (+)-**2** (81 mg, 0.28 mmol, 1.0 equiv) and aziridine (+)-**3c** (190 mg, 0.56 mmol, 2.0 equiv) afforded TBS-(*S,S*)-**6** (80 mg, 0.12 mmol, 41% yield) as a pale yellow oil.

(*S,S*)-**6** : Following the general procedure for TBS group removal (Method B), TBS-(*S,S*)-**6** (75 mg, 0.11 mmol) afforded (*S,S*)-**6** (54 mg, 0.093 mmol, 87% yield) as a pale yellow oil:  $R_f$  0.30 (hexane/EtOAc = 2:1);  $[\alpha]_D^{24}$  -50.1 (c 2.00, CHCl<sub>3</sub>); IR (film) 3274 (m, br), 3028 (w), 2920 (m), 1598 (w), 1493 (m), 1420 (m), 1326 (m), 1159 (s), 1091 (m), 813 (w), 756 (m), 701 (m) cm<sup>-1</sup>; <sup>1</sup>H NMR (500 MHz, CDCl<sub>3</sub>)  $\delta$  7.59 (d,  $J$  = 8.2 Hz, 2H), 7.22 – 7.14 (m, 7H), 6.35 (d,  $J$  = 3.5 Hz, 1H), 4.76 (ddd,  $J$  = 4.10, 4.10, 9.06 Hz, 1H), 4.38-4.32 (m, 1H), 3.04 – 2.96 (m, 1H), 2.96 – 2.86 (m, 2H), 2.86 – 2.74 (m, 4H), 2.68 (ddd,  $J$  = 14.7, 6.4, 3.1 Hz, 1H), 2.62 (dd,  $J$  = 15.3, 9.1 Hz, 1H), 2.41 (dd,  $J$  = 15.0, 10.7 Hz, 1H), 2.38 (s, 3H), 2.15 (dd,  $J$  = 14.9, 9.3 Hz, 1H), 2.09 – 1.96 (m, 2H), 1.93 – 1.80 (m, 2H), 1.70 – 1.64 (m, 3H), 1.63 (s, 3H); <sup>13</sup>C NMR (125 MHz, CDCl<sub>3</sub>)  $\delta$  143.08, 142.34, 137.21, 129.38, 128.44, 127.72, 127.36, 126.90, 65.91, 56.02, 51.20, 48.40, 47.82, 45.84, 45.54, 28.76, 26.86, 26.75, 26.46, 26.21, 24.76, 24.75, 21.63; HRMS (ES)  $m/z$  606.1270 [(M+Na)<sup>+</sup>; C<sub>27</sub>H<sub>39</sub>NO<sub>3</sub>S<sub>5</sub>Na: 606.1275].

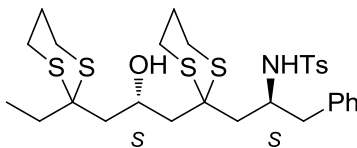

(*S,S*)-**7**

TBS-(*S,S*)-**7** : Following the Type II ARC general procedure, 2-methyl-1,3-dithiane **1a** (38 mg, 0.26 mmol, 1.5 equiv), linchpin (+)-**2** (50 mg, 0.17 mmol, 1.0 equiv) and aziridine (+)-**3a** (99 mg, 0.34 mmol, 2.0 equiv) afforded TBS-(*S,S*)-**7** (81 mg, 0.11 mmol, 65% yield) as a pale yellow oil.

(*S,S*)-**7** : Following the general procedure for removal of TBS group (Method A), TBS-(*S,S*)-**7** (81 mg, 0.11 mmol) afforded (*S,S*)-**8** (64 mg, 0.11 mmol, 94% yield) as a pale yellow oil:  $R_f$  0.33 (hexane/EtOAc = 2:1);  $[\alpha]_D^{25}$   $-4.67$  (c 0.28, CHCl<sub>3</sub>); IR (film) 3179 (m, br), 2926 (s), 1419 (m), 1327 (m), 1157 (s), 1091 (s), 813 (m), 754 (m), 667 (m) cm<sup>-1</sup>; <sup>1</sup>H NMR (500 MHz, CDCl<sub>3</sub>)  $\delta$  7.87 (d,  $J$  = 8.2 Hz, 2H), 7.30 (d,  $J$  = 8.4 Hz, 2H), 7.27 (d,  $J$  = 7.4 Hz, 2H), 7.23 (d,  $J$  = 6.8 Hz, 2H), 7.22 – 7.17 (m, 1H), 4.68 (s, 1H), 4.36 (t,  $J$  = 9.8 Hz, 1H), 3.88 (app t,  $J$  = 9.4 Hz, 1H), 3.20 (dd,  $J$  = 13.2, 3.2 Hz, 1H), 3.13 (ddd,  $J$  = 13.9, 10.9, 2.7 Hz, 1H), 2.98 (ddd,  $J$  = 13.9, 10.9, 2.7 Hz, 1H), 2.78 (ddd,  $J$  = 14.6, 7.5, 4.5 Hz, 1H), 2.57 (ddd,  $J$  = 13.8, 10.9, 2.7 Hz, 1H), 2.53 – 2.45 (m, 2H), 2.41 (s, 3H), 2.39 ((dd,  $J$  = 15.0, 10.0 Hz, 1H), 2.29 (d,  $J$  = 15.4 Hz, 1H), 2.21 (dd,  $J$  = 15.6, 9.5 Hz, 1H), 2.15 – 2.06 (m, 1H), 2.06 – 1.95 (m, 2H), 1.93 – 1.83 (m, 2H), 1.77 (dd,  $J$  = 15.1, 10.0 Hz, 1H), 1.71 – 1.65 (m, 2H), 1.61 – 1.53 (m, 1H), 1.53 – 1.45 (m, 1H), 1.40 (d,  $J$  = 15.0 Hz, 1H), 1.00 (t,  $J$  = 7.4 Hz, 3H); <sup>13</sup>C NMR (125 MHz, CDCl<sub>3</sub>)  $\delta$  143.05, 139.40, 138.62, 130.04, 129.61, 128.57, 127.37, 126.58, 65.10, 53.40, 52.00, 51.14, 44.46, 44.34, 43.85, 37.96, 32.86, 26.55, 25.98, 25.95, 25.18, 24.92, 24.71, 21.65, 8.46; HRMS (ES)  $m/z$  634.1599 [(M+H)<sup>+</sup>; calcd for C<sub>29</sub>H<sub>41</sub>NO<sub>3</sub>S<sub>3</sub>Na: 634.1588].

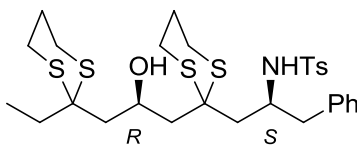

(*R,S*)-**7**

TBS-(*R,S*)-**7** : Following the Type II ARC general procedure, 2-methyl-1,3-dithiane **1a** (61 mg, 0.41 mmol, 1.5 equiv), linchpin (–)-**2** (80 mg, 0.28 mmol, 1.0 equiv) and aziridine (+)-**3a** (160 mg, 0.55 mmol, 2.0 equiv) afforded TBS-(*R,S*)-**7** (120 mg, 0.16 mmol, 59% yield) as a pale yellow oil.

(*R,S*)-**7** : Following the general procedure for removal of TBS group (Method B), TBS-(*R,S*)-**7** (86 mg, 0.11 mmol) afforded (*R,S*)-**7** (70 mg, 0.11 mmol, 97% yield) as a pale yellow oil:  $R_f$  0.31 (hexane/EtOAc = 2:1);  $[\alpha]_D^{28}$   $+23.64$  (c 2.00,

CHCl<sub>3</sub>); IR (film) 3290 (m, br), 2926 (s), 1598 (w), 1419 (m), 1325 (m), 1157 (s), 1087 (s), 1043 (s), 812 (m), 702 (m) cm<sup>-1</sup>; <sup>1</sup>H NMR (500 MHz, CDCl<sub>3</sub>) δ 7.78 (d, *J* = 8.5 Hz, 2H), 7.28 (d, *J* = 8.0 Hz, 2H), 7.22 (d, *J* = 7.0 Hz, 2H), 7.19 (dddd, *J* = 8.0, 8.0, 1.0, 1.0 Hz, 1H), 7.14 (d, *J* = 7.0 Hz, 2H), 5.57 (d, *J* = 5.5 Hz, 1H), 4.18 (dddd, *J* = 5.5, 5.5, 3.5, 3.5 Hz, 1H), 3.30 (brs, 1H), 2.95 (dd, *J* = 14.0, 4.5 Hz, 1H), 2.96 – 2.74 (m, 5H), 2.75 – 2.63 (m, 2H), 2.56 (ddd, *J* = 14.5, 7.4, 3.5 Hz, 1H), 2.46 (ddd, *J* = 14.5, 9.0, 3.0 Hz, 1H), 2.42 (s, 3H), 2.24 ((dd, *J* = 15.5, 3.5 Hz, 1H), 2.17 (dd, *J* = 15.0, 8.5 Hz, 1H), 2.08 (dd, *J* = 15.5, 9.5 Hz, 1H), 2.23 – 1.95 (m, 2H), 1.94– 1.85 (m, 2H), 1.85 – 1.73 (m, 2H), 1.66 (dd, *J* = 15.1, 2.0 Hz, 1H), 1.63 (d, *J* = 5.5 Hz, 2H), 0.99 (t, *J* = 7.0 Hz, 3H). <sup>13</sup>C NMR (125 MHz, CDCl<sub>3</sub>) δ 143.31, 137.60, 137.49, 130.02, 129.68, 128.42, 127.70, 126.57, 65.62, 52.90, 52.83, 51.17, 46.31, 44.95, 42.72, 41.83, 32.54, 26.44, 26.36, 26.10, 26.02, 25.06, 24.64, 21.68, 8.88; HRMS (ES) *m/z* 612.1782 [(M+H)<sup>+</sup>; calcd for C<sub>29</sub>H<sub>42</sub>NO<sub>3</sub>S<sub>3</sub>: 612.1768].

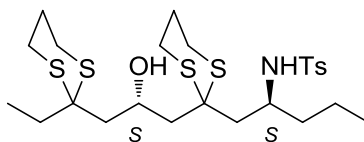

(*S,S*)-**8**

TBS-(*S,S*)-**8** : Following the Type II ARC general procedure, 2-methyl-1,3-dithiane **1a** (60 mg, 0.41 mmol, 1.5 equiv), linchpin (–)-**2** (80 mg, 0.27 mmol, 1.0 equiv) and aziridine (+)-**3a** (130 mg, 0.54 mmol, 2.0 equiv) afforded TBS-(*S,S*)-**8** (100 mg, 0.15 mmol, 55% yield) as a pale yellow oil.

(*S,S*)-**8** : Following the general procedure for TBS group removal (Method B), TBS-(*S,S*)-**8** (27 mg, 0.040 mmol) afforded (*S,S*)-**8** (20 mg, 0.036 mmol, 89% yield) as a pale yellow oil: *R*<sub>f</sub> 0.40 (hexane/EtOAc = 2:1); [α]<sub>D</sub><sup>26</sup> –4.69 (c 1.00, CHCl<sub>3</sub>); IR (film) 33184 (m, br), 2928 (s), 1598 (w), 1420 (m), 1326 (m), 1158 (s), 1092 (s), 813 (m), 755 (m), 667 (s) cm<sup>-1</sup>; <sup>1</sup>H NMR (500 MHz, CDCl<sub>3</sub>) δ 7.79 (d, *J* = 8.4 Hz, 2H), 7.28 (d, *J* = 8.4 Hz, 2H), 7.09 (d, *J* = 3.9 Hz, 1H), 4.65 (s, 1H), 4.37 (t, *J* = 9.9 Hz, 1H), 3.78 (sextet, *J* = 4.7 Hz, 1H), 3.19 (ddd, *J* = 14.0, 11.1, 2.6 Hz, 1H), 3.1 (ddd, *J* = 14.0, 11.1, 2.6 Hz, 1H), 2.82 – 2.74 (m, 3H), 2.74 – 2.65 (m, 3H), 2.54 (dd, *J* = 15.2, 10.0 Hz, 1H), 2.41 (s, 3H), 2.34 (dd, *J* = 15.4, 9.9 Hz, 1H), 2.14 – 2.06 (m, 1H), 2.10 (d, 2.03 *J* = 14.4 Hz, 1H), 2.03 (m, 2H), 1.97 – 1.82 (m, 4H), 1.71 (app t, *J* = 13.7 Hz, 2H), 1.45 – 1.39 (m, 2H), 1.36 – 1.26 (m, 1H), 1.26 – 1.16 (m, 1H), 1.03 (t, *J* = 7.4 Hz, 1H), 0.78 (t, *J* = 7.3 Hz, 1H); <sup>13</sup>C NMR (125 MHz, CDCl<sub>3</sub>) δ 142.82, 139.55, 129.46, 127.31, 66.31, 52.08, 51.61, 50.42, 43.77, 43.02, 41.22, 39.41, 32.87, 26.55, 26.20, 26.14, 25.97, 25.44, 24.98, 21.66, 17.77, 14.12, 8.52; HRMS (ES) *m/z* 586.1584 [(M+Na)<sup>+</sup>; C<sub>25</sub>H<sub>41</sub>NO<sub>3</sub>S<sub>5</sub>Na: 586.1588].



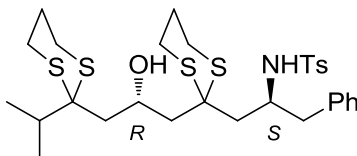

(*R,S*)-**9**

TBS-(*R,S*)-**9** : Following the Type II ARC general procedure, 2-methyl-1,3-dithiane **1c** (46 mg, 0.28 mmol, 1.5 equiv), linchpin (+)-**2** (55 mg, 0.19 mmol, 1.0 equiv) and aziridine (+)-**3b** (110 mg, 0.38 mmol, 2.0 equiv) afforded TBS-(*R,S*)-**9** (78 mg, 0.11 mmol, 56% yield) as a pale yellow oil.

(*R,S*)-**9** : Following the general procedure for TBS group removal (Method A), TBS-(*R,S*)-**9** (78 mg, 0.110 mmol) afforded (*R,S*)-**9** (60 mg, 0.096 mmol, 91% yield) as a pale yellow oil:  $R_f$  0.45 (hexane/EtOAc = 2:1);  $[\alpha]_D^{25}$  -56.38 (c 1.00, CHCl<sub>3</sub>); IR (film) 3178 (m, br), 3026 (w), 2926 (s), 1599 (w), 1419 (m), 1328 (m), 1158 (s), 1090 (s), 979 (w), 906 (w), 813 (w), 755 (m), 703 (w) cm<sup>-1</sup>; <sup>1</sup>H NMR (500 MHz, CDCl<sub>3</sub>)  $\delta$  7.88 (d,  $J$  = 8.2 Hz, 2H), 7.46 (d,  $J$  = 3.8 Hz, 1H), 7.31 (d,  $J$  = 7.9 Hz, 2H), 7.28 (d,  $J$  = 7.3 Hz, 2H), 7.24 (d,  $J$  = 6.8 Hz, 2H), 7.19 (t,  $J$  = 7.2 Hz, 1H), 4.84 (s, 1H), 4.44 (app t,  $J$  = 9.9 Hz, 1H), 3.89 (app t,  $J$  = 9.5 Hz, 1H), 3.21 (dd,  $J$  = 13.2, 3.3 Hz, 1H), 3.14 (ddd,  $J$  = 13.9, 8.4, 2.9 Hz, 1H), 2.96 (ddd,  $J$  = 13.6, 10.4, 2.9 Hz, 1H), 2.84 – 2.76 (m, 2H), 2.57 (ddd,  $J$  = 14.0, 11.0, 2.7 Hz, 1H), 2.52 – 2.45 (m, 2H), 2.41 (s, 3H), 2.45 – 2.35 (m, 1H), 2.32 – 2.25 (m, 2H), 2.22 (dd,  $J$  = 15.5, 9.4 Hz, 1H), 2.12-2.06 (m, 1H), 2.02 (m, 1H), 1.92 – 1.83 (m, 1H), 1.78 – 1.71 (m, 2H), 1.71 – 1.64 (m, 1H), 1.59 – 1.52 (m, 1H), 1.51-1.44 (m, 1H), 1.40 (d,  $J$  = 15.0 Hz, 1H), 1.23 (d,  $J$  = 6.8 Hz, 2H), 1.00 (d,  $J$  = 6.8 Hz, 2H); <sup>13</sup>C NMR (125 MHz, CDCl<sub>3</sub>)  $\delta$  143.03, 139.50, 138.71, 130.08, 129.62, 128.59, 127.40, 126.60, 64.77, 56.88, 53.48, 51.20, 44.62, 44.45, 42.14, 37.86, 34.82, 26.41, 25.98, 25.55, 25.24, 25.01, 24.71, 21.68, 18.65, 17.09; HRMS (ES)  $m/z$  648.1725 [(M+Na)<sup>+</sup>; C<sub>30</sub>H<sub>43</sub>NO<sub>3</sub>S<sub>5</sub>Na: 648.1744].

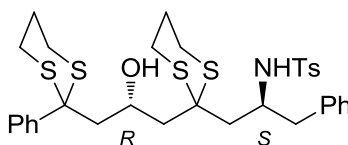

(*R,S*)-**10**

TBS-(*R,S*)-**10** : Following the Type II ARC general procedure, 2-methyl-1,3-dithiane **1d** (51 mg, 0.26 mmol, 1.5 equiv), linchpin (+)-**2** (50 mg, 0.17 mmol, 1.0 equiv) and aziridine (+)-**3a** (99 mg, 0.34 mmol, 2.0 equiv) afforded TBS-(*R,S*)-**10** (69 mg, 0.089 mmol, 52% yield) as a pale yellow oil.

(*R,S*)-**10** : Following the general procedure for TBS group removal (Method A), TBS-(*R,S*)-**10** (69 mg, 0.089 mmol) afforded (*R,S*)-**10** (55 mg, 0.083 mmol, 93% yield) as a pale yellow oil:  $R_f$  0.35 (hexane/EtOAc = 2:1);  $[\alpha]_D^{30}$  +66.04 (c 1.00,

CHCl<sub>3</sub>); IR (film) 3190 (m, br), 2923 (s), 1597 (w), 1442 (m), 1328 (m), 1158 (s), 1090 (s), 813 (w), 754 (m), 702 (m) cm<sup>-1</sup>; <sup>1</sup>H NMR (500 MHz, CDCl<sub>3</sub>) δ 7.86 (d, *J* = 8.3 Hz, 2H), 7.83 (d, *J* = 7.5 Hz, 2H), 7.41 (t, *J* = 7.8 Hz, 2H), 7.32–7.22 (m, 7H), 7.18 (t, *J* = 7.1 Hz, 1H), 4.29 (t, *J* = 9.6 Hz, 1H), 3.83–3.77 (m, 1H), 3.24 (dd, *J* = 13.2, 3.2 Hz, 1H), 2.87 (dddd, *J* = 14.0, 14.0, 6.5, 3.0 Hz, 2H), 2.81–2.70 (m, 2H), 2.53 (dd, *J* = 13.5, 10.5 Hz, 1H), 2.48 (dd, *J* = 10.6, 3.0 Hz, 1H), 2.44–2.38 (m, 1H), 2.39 (s, 2H), 2.27 (dd, *J* = 15.1, 9.3 Hz, 1H), 2.20 (d, *J* = 15.4 Hz, 1H), 2.09 (dd, *J* = 15.6, 9.6 Hz, 1H), 2.07–1.97 (m, 2H), 1.99–1.90 (m, 1H), 1.87 (d, *J* = 14.9 Hz, 1H), 1.67–1.58 (m, 1H), 1.58–1.47 (m, 3H), 1.30 (d, *J* = 15.1 Hz, 1H); <sup>13</sup>C NMR (125 MHz, CDCl<sub>3</sub>) δ 143.06, 141.63, 139.13, 138.59, 130.11, 129.68, 129.13, 128.55, 127.95, 127.89, 127.44, 126.57, 65.55, 56.80, 53.28, 51.11, 44.57, 43.93, 38.16, 28.06, 27.43, 25.92, 25.10, 24.76, 24.63, 21.65; HRMS (ES) *m/z* 682.1603 [(M+Na)<sup>+</sup>; calcd for C<sub>33</sub>H<sub>41</sub>NO<sub>3</sub>S<sub>5</sub>Na: 682.1588].

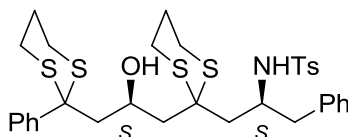

(*S,S*)-**10**

TBS-(*S,S*)-**10**: Following the Type II ARC general procedure, 2-methyl-1,3-dithiane **1d** (51 mg, 0.26 mmol, 1.5 equiv), linchpin (–)-**2** (50 mg, 0.17 mmol, 1.0 equiv) and aziridine (+)-**3a** (99 mg, 0.34 mmol, 2.0 equiv) afforded TBS-(*S,S*)-**10** (73 mg, 0.094 mmol, 55% yield) as a pale yellow oil.

(*S,S*)-**10** : Following the general procedure for TBS group removal (Method A), TBS-(*S,S*)-**10** (73 mg, 0.094 mmol) afforded (*S,S*)-**10** (56 mg, 0.085 mmol, 90% yield) as a pale yellow oil: *R*<sub>f</sub> 0.35 (hexane/EtOAc = 2:1); [α]<sub>D</sub><sup>26</sup> +14.80 (c 1.00, CHCl<sub>3</sub>); IR (film) 3282 (m, br), 3025 (w), 2910 (s), 1598 (w), 1422 (m), 1327 (m), 1158 (s), 1089 (s), 814 (w), 753 (m), 702 (s), 665 (m) cm<sup>-1</sup>; <sup>1</sup>H NMR (500 MHz, CDCl<sub>3</sub>) δ 7.90 (dd, *J* = 8.4, 1.0 Hz, 2H), 7.77 (d, *J* = 8.3 Hz, 2H), 7.40 (t, *J* = 8.3 Hz, 2H), 7.30–7.24 (m, 3H), 7.22 (d, *J* = 7.43 Hz, 2H), 7.20–7.16 (m, 1H), 7.13 (d, *J* = 7.43 Hz, 2H), 5.29 (d, *J* = 5.4 Hz, 1H), 4.08–4.02 (m, 1H), 3.84–3.76 (m, 1H), 2.93 (dd, *J* = 13.5, 4.1 Hz, 1H), 2.80 (dd, *J* = 13.5, 7.8 Hz, 1H), 2.74–2.68 (m, 4H), 2.62 (d, *J* = 5.7 Hz, 2H), 2.48 (ddd, *J* = 14.5, 6.6, 4.1 Hz, 1H), 2.43–2.34 (m, 2H), 2.37 (s, 3H), 2.10 (dd, *J* = 15.4, 3.2 Hz, 1H), 2.08–2.03 (m, 1H), 1.99–1.91 (m, 3H), 1.80–1.76 (m, 1H), 1.78–1.69 (m, 2H), 1.42–1.39 (m, 2H); <sup>13</sup>C NMR (125 MHz, CDCl<sub>3</sub>) δ 143.41, 141.95, 137.51, 137.41, 130.08, 129.73, 128.97, 128.58, 128.41, 127.72, 127.49, 126.57, 65.56, 57.74, 52.90, 52.69, 51.04, 45.48, 42.90, 41.61, 27.91, 27.55, 26.36, 25.92, 24.84, 24.59, 21.64; HRMS (ES) *m/z* 694.1383 [(M+Cl)<sup>-</sup>; calcd for C<sub>33</sub>H<sub>41</sub>ClNO<sub>3</sub>S<sub>5</sub>: 694.1379].

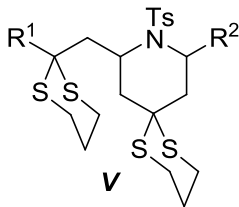

### 3. General procedure for intramolecular $S_N2$ cyclization.

**V:** To a solution of **IV** (0.10 mmol, 1.0 equiv) in THF (5.0 mL) were added triethylamine (0.30 mmol, 3.0 equiv) and methanesulfonyl chloride (0.15 mmol, 1.5 equiv) at 0 °C. After being stirred for 5 h, a saturated aqueous  $\text{NH}_4\text{Cl}$  solution (5.0 mL) was added, and the resulting mixture filtered through a short silica gel and rinsed with dry THF (5 x 20mL). The combined organic layers were diluted with THF (100 mL) affording a ~0.5mM solution of the mesylate. This solution was treated with NaH (0.50 mmol, 5.0 equiv) at room temperature, and stirred for 5-12 h. The reaction mixture was quenched with MeOH (5.0 mL) and concentrated in vacuo. Flash chromatography (EtOAc/hexane = 1/10) afforded the fully protected piperidine **V**.

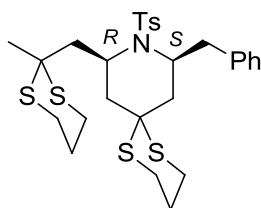

(*R,S*)-**11**

(*R,S*)-**11**: Following the general procedure for intramolecular  $S_N2$  cyclization, (*S,S*)-**4** (1.4 g, 2.3 mmol) afforded (*R,S*)-**11** (1.2 mg, 2.1 mmol, 87 % yield) as a pale yellow oil:  $[\alpha]_D^{28} +21.65$  (c 1.00,  $\text{CHCl}_3$ ); IR (film) 2923 (s), 1599 (w), 1493 (w), 1449 (m), 1333 (m), 1159 (s), 1100 (m), 911 (w), 813 (w), 753 (m), 704 (m)  $\text{cm}^{-1}$ ;  $^1\text{H}$  NMR (500 MHz,  $\text{CDCl}_3$ )  $\delta$  7.79 (d,  $J = 8.3$  Hz, 2H), 7.36 – 7.24 (m, 7H), 4.18 – 4.13 (m, 1H), 4.12 – 4.07 (m, 1H), 3.36 (dd,  $J = 13.2, 3.3$  Hz, 1H), 3.22 (dd,  $J = 13.2, 10.2$  Hz, 1H), 3.02 (ddd,  $J = 13.8, 10.8, 2.6$  Hz, 1H), 2.90 (ddd,  $J = 13.8, 10.8, 2.7$  Hz, 1H), 2.84 – 2.67 (m, 5H), 2.61 – 2.52 (m, 2H), 2.41 (s, 3H), 2.23 (dd,  $J = 14.5, 1.6$  Hz, 1H), 2.12 (dd,  $J = 15.2, 2.8$  Hz, 1H), 2.08 (t,  $J = 7.0$  Hz, 2H), 2.06 – 2.01 (m, 1H), 1.92 – 1.78 (m, 2H), 1.71 (dd,  $J = 15.2, 6.3$  Hz, 1H), 1.65 (s, 1H);  $^{13}\text{C}$  NMR (125 MHz,  $\text{CDCl}_3$ )  $\delta$  143.64, 138.34, 136.81, 129.90, 129.84, 128.68, 127.89, 126.79, 54.47, 50.80, 48.49, 48.31, 44.40, 44.37, 41.38, 37.13, 29.83, 28.52, 27.31, 27.19, 27.05, 26.85, 24.92, 24.74, 21.69; HRMS (ES)  $m/z$  580.1509 [ $(\text{M}+\text{H})^+$ ]; calcd for  $\text{C}_{28}\text{H}_{38}\text{NO}_2\text{S}_5$ : 580.1506].

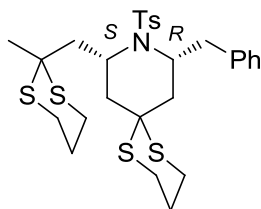

(*S,R*)-**11**

(*S,R*)-**11**: Following the general procedure for intramolecular  $S_N2$  cyclization, (*R,R*)-**4** (1.5 g, 2.5 mmol) afforded (*S,R*)-**11** (1.4 g, 2.3 mmol, 85% yield) as a pale yellow oil:  $[\alpha]_D^{26} -24.30$  (c 1.00,  $\text{CHCl}_3$ ); IR,  $^1\text{H}$  and  $^{13}\text{C}$  NMR are identical to those of (*R,S*)-**11**; HRMS (ES)  $m/z$  614.1139  $[(\text{M}+\text{Cl})^-]$ ; calcd for  $\text{C}_{28}\text{H}_{37}\text{ClNO}_2\text{S}_5$ : 614.1116].

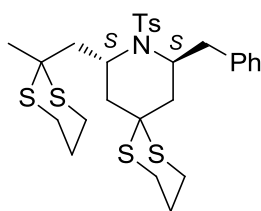

(*S,S*)-**11**

(*S,S*)-**11**: Following the general procedure for intramolecular  $S_N2$  cyclization, (*R,S*)-**4** (0.64 g, 1.1 mmol) afforded (*S,S*)-**11** (0.36 g, 0.62 mmol, 58% yield) as a pale yellow oil:  $[\alpha]_D^{25} +24.64$  (c 0.67,  $\text{CHCl}_3$ ); IR (film) 3026 (w), 2918 (s), 1597 (w), 1495 (w), 1432 (w), 1316 (m), 1150 (s), 1094 (m), 860 (s), 750 (m), 694 (m)  $\text{cm}^{-1}$ ;  $^1\text{H}$  NMR (500 MHz,  $\text{CDCl}_3$ )  $\delta$  7.32 – 7.24 (m, 5H), 7.20 – 7.10 (m, 2H), 7.05 (d,  $J = 8.0$  Hz, 2H), 4.60 (app brs, 1H), 4.26 – 4.16 (m, 1H), 3.48 (dd,  $J = 13.9, 9.3$  Hz, 1H), 3.06 (dd,  $J = 14.0, 6.4$  Hz, 1H), 2.92 – 2.83 (m, 2H), 2.83 – 2.75 (m, 1H), 2.70 – 2.63 (m, 1H), 2.60 (d,  $J = 5.4$  Hz, 2H), 2.55 (d,  $J = 15.1$  Hz, 1H), 2.53 – 2.45 (m, 3H), 2.40 – 2.34 (m, 1H), 2.33 (s, 3H), 2.30 (d,  $J = 4.8$  Hz, 2H), 2.26 – 2.23 (m, 1H), 2.02 – 1.88 (m, 2H), 1.80 – 1.69 (m, 2H), 1.50 (s, 3H);  $^{13}\text{C}$  NMR (125 MHz,  $\text{CDCl}_3$ )  $\delta$  142.67, 141.13, 139.67, 129.65, 129.47, 128.71, 127.11, 126.50, 58.57, 51.60, 49.04, 48.92, 43.72, 43.29, 40.47, 39.90, 27.88, 26.85, 26.47, 26.42, 26.32, 25.24, 24.71, 21.47; HRMS (ES)  $m/z$  580.1155  $[(\text{M}+\text{H})^+]$ ; calcd for  $\text{C}_{28}\text{H}_{38}\text{NO}_2\text{S}_5$ : 580.1506].

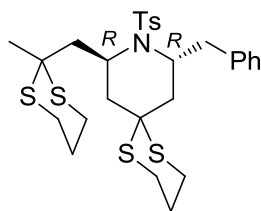

(*R,R*)-**11**

**(R,R)-11:** Following the general procedure for intramolecular S<sub>N</sub>2 cyclization, (*S,R*)-**4** (0.30g, 0.502 mmol) afforded (*R,R*)-**11** (0.16 g, 0.276 mmol, 55% yield) as a pale yellow oil: [ $\alpha$ ]<sub>D</sub><sup>27</sup> -27.54 (c 0.75, CHCl<sub>3</sub>); IR, <sup>1</sup>H and <sup>13</sup>C NMR are identical to those of (*S,S*)-**11**; HRMS (ES) *m/z* 610.1074 [(M+Cl)<sup>-</sup>; calcd for C<sub>28</sub>H<sub>37</sub>ClNO<sub>2</sub>S<sub>5</sub>: 614.1116].

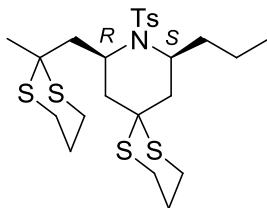

**(R,S)-12**

**(R,S)-12:** Following the general procedure for intramolecular S<sub>N</sub>2 cyclization, (*S,S*)-**5** (80 mg, 0.15 mmol) afforded (*R,S*)-**12** (69 mg, 0.13 mmol, 89% yield) as a pale yellow oil: [ $\alpha$ ]<sub>D</sub><sup>31</sup> -31.40 (c 0.51, CHCl<sub>3</sub>); IR (film) 2956 (s), 2927 (s), 2869 (s), 1597 (w), 1438 (m), 1326 (s), 1161 (s), 1094 (s), 909 (m), 813 (m), 735 (m), 662 (s) cm<sup>-1</sup>; <sup>1</sup>H NMR (500 MHz, CDCl<sub>3</sub>)  $\delta$  7.74 (d, *J* = 8.3 Hz, 2H), 7.28 (d, *J* = 8.0 Hz, 2H), 4.16 (ddd, *J* = 8.7, 6.4, 3.3 Hz, 1H), 3.89 (dq, *J* = 8.2, 6.0 Hz, 1H), 3.07 (ddd, *J* = 14.0, 10.5, 3.0 Hz, 1H), 2.95 (*J* = 14.0, 10.5, 3.0 Hz, 1H), 2.88 – 2.80 (m, 2H), 2.79 – 2.74 (m, 2H), 2.74 – 2.68 (m, 3H), 2.52 (dd, *J* = 14.5, 2.0 Hz, 1H), 2.40 (s, 3H), 2.17 (dd, *J* = 15.1, 4.6 Hz, 1H), 2.08 – 1.96 (m, 5H), 1.93 – 1.85 (m, 3H), 1.80 – 1.71 (m, 1H), 1.69 (s, 3H), 1.46 – 1.36 (m, 2H), 0.95 (t, *J* = 7.3 Hz, 3H); <sup>13</sup>C NMR (125 MHz, CDCl<sub>3</sub>)  $\delta$  143.42, 137.24, 129.75, 127.79, 52.85, 50.80, 48.64, 48.38, 44.59, 40.50, 40.45, 38.82, 28.89, 27.24, 27.09, 27.09, 26.92, 24.99, 24.82, 21.68, 19.99, 14.06; HRMS (ES) *m/z* 554.1320 [(M+Na)<sup>+</sup>; calcd for C<sub>24</sub>H<sub>37</sub>NO<sub>2</sub>S<sub>5</sub>Na: 554.1326].

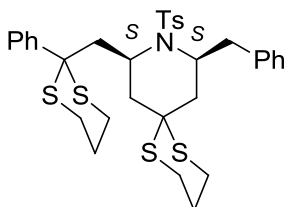

**(S,S)-13**

**(S,S)-13:** Following the general procedure for intramolecular S<sub>N</sub>2 cyclization, (*R,S*)-**10** (0.65 mg, 0.099 mmol) afforded (*S,S*)-**13** (0.51 mg, 0.080 mmol, 81% yield) as a pale yellow oil: [ $\alpha$ ]<sub>D</sub><sup>31</sup> -16.86 (c 2.00, CHCl<sub>3</sub>); IR (film) 3025 (w), 2908 (s), 1598 (w), 1491 (w), 1442 (m), 1336 (s), 1160 (s), 1100 (s), 908 (m), 814 (m), 753 (s), 702 (s) cm<sup>-1</sup>; <sup>1</sup>H NMR (500 MHz, CDCl<sub>3</sub>)  $\delta$  7.97 (d, *J* = 7.5 Hz, 2H), 7.56 (d, *J* = 8.3 Hz, 2H), 7.45 (t, *J* = 7.8 Hz, 2H), 7.33 (t, *J* = 7.4 Hz, 2H), 7.29 (d, *J* = 7.3 Hz, 2H), 7.25 (d, *J* = 6.9 Hz, 1H), 7.23 - 7.17 (m, 3H), 4.14 – 4.05 (m, 1H), 3.96 (dt, *J* = 9.5, 4.8 Hz, 1H), 3.18 (dd, *J* = 13.1, 3.5 Hz, 1H), 3.08 (dd, *J* = 13.1, 10.8 Hz, 1H), 2.84 - 2.77 (m, 2H), 2.77 - 2.67 (m, 5H), 2.64 (ddd, *J* = 14.4, 7.5, 3.5 Hz, 1H),

2.56 (ddd,  $J = 14.2, 8.5, 3.1$  Hz, 1H), 2.46 (ddd,  $J = 14.5, 7.5, 3.2$  Hz, 1H), 2.37 (s, 3H), 2.03 – 1.92 (m, 1H), 1.90 (dd,  $J = 15.2, 5.7$  Hz, 1H), 1.86 – 1.71 (m, 4H), 1.66 (dd,  $J = 15.3, 6.3$  Hz, 1H);  $^{13}\text{C}$  NMR (125 MHz,  $\text{CDCl}_3$ )  $\delta$  143.28, 141.17, 138.43, 137.04, 129.75, 129.57, 129.06, 128.97, 128.65, 127.73, 127.52, 126.68, 57.59, 54.40, 51.70, 49.68, 44.49, 44.36, 39.77, 36.98, 28.02, 27.75, 27.09, 27.06, 24.90, 24.64, 21.64; HRMS (ES)  $m/z$  642.1678 [(M+H) $^+$ ]; calcd for  $\text{C}_{33}\text{H}_{40}\text{NO}_2\text{S}_5$ : 642.1663].

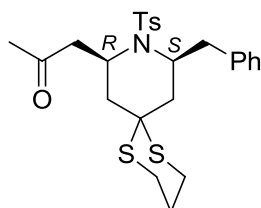

(*R,S*)-**14**

(*R,S*)-**14**: To a stirred solution of (*R,S*)-**11** (130 mg, 0.22 mmol) in THF- $\text{H}_2\text{O}$  (4:1, 13 mL) were added 2,6-lutidine (180  $\mu\text{L}$ , 1.7 mmol) and  $\text{Hg}(\text{ClO}_4)_2$  (240 mg, 0.60 mmol) at 0  $^\circ\text{C}$ . After 30 min, the reaction mixture was filtered through celite and rinsed with EtOAc (3 x 10 mL). The combined organic layers were poured into saturated aqueous  $\text{NH}_4\text{Cl}$  (20 mL) and extracted with EtOAc (3 x 20 mL). The combined organic layers were washed with brine (5 mL), dried over  $\text{MgSO}_4$ , filtered, and concentrated in vacuo. Flash chromatography on silica gel (hexanes/EtOAc, 100/1 to 2/1) provided (*R,S*)-**14** (72 mg, 0.15 mmol, 68% yield) as a pale yellow oil:  $R_f$  0.35 (hexane/EtOAc = 4:1);  $[\alpha]_D^{24} +32.27$  (c 0.50,  $\text{CHCl}_3$ ); IR (film) 3027 (w), 2922 (s), 1712 (s), 1598 (s), 1473 (w), 1421 (m), 1326 (s), 1160 (s), 1098 (s), 1034 (w), 754 (m), 703 (m)  $\text{cm}^{-1}$ ;  $^1\text{H}$  NMR (500 MHz,  $\text{CDCl}_3$ )  $\delta$  7.63 (d,  $J = 8.3$  Hz, 2H), 7.27 – 7.23 (m, 4H), 7.19 (d,  $J = 7.4$  Hz, 2H), 7.17 – 7.14 (m, 1H), 4.34 (ddt,  $J = 13.7, 6.9, 3.8$  Hz, 1H), 4.13 (ddt,  $J = 10.5, 6.9, 3.4$  Hz, 1H), 3.46 (dd,  $J = 17.9, 10.7$  Hz, 1H), 3.29 (dd,  $J = 13.0, 11.4$  Hz, 1H), 3.14 (dd,  $J = 13.0, 3.5$  Hz, 1H), 2.96 (dd,  $J = 17.9, 3.0$  Hz, 1H), 2.81 – 2.73 (m, 2H), 2.62 (ddd,  $J = 14.4, 6.6, 3.1$  Hz, 1H), 2.51 (ddd,  $J = 14.5, 6.7, 3.0$  Hz, 1H), 2.38 (dd,  $J = 15.0, 3.7$  Hz, 1H), 2.32 (s, 3H), 2.09 (s, 3H), 1.98 (dd,  $J = 14.9, 2.8$  Hz, 1H), 1.86 (dd,  $J = 14.9, 6.1$  Hz, 2H), 1.79 – 1.68 (m, 1H), 1.49 (dd,  $J = 15.0, 6.8$  Hz, 1H);  $^{13}\text{C}$  NMR (125 MHz,  $\text{CDCl}_3$ )  $\delta$  206.88, 143.60, 138.59, 137.22, 129.88, 129.82, 128.74, 127.22, 126.77, 54.58, 50.30, 48.14, 44.84, 44.29, 37.83, 36.82, 30.68, 26.94, 26.90, 24.72, 21.63; HRMS (ES)  $m/z$  512.1351 [(M+Na) $^+$ ]; calcd for  $\text{C}_{25}\text{H}_{31}\text{NO}_3\text{S}_3\text{Na}$ : 512.1364].

#### 4. Reduction Conditions of (*R,S*)-**14**

**A**: To a stirred solution of (*R,S*)-**14** (8.0 mg, 0.016 mmol) in MeOH (1.0 mL) was added  $\text{NaBH}_4$  (1.0 mg, 0.026 mmol) at 0  $^\circ\text{C}$ . After being stirred for 30 min, the reaction mixture was concentrated in vacuo to provide (*S,R,S*)-**15** and (*R,R,S*)-**15** as a

1:2 mixture as determined by crude  $^1\text{H}$  NMR spectroscopy which were separated by preparatory thin-layer chromatography (hexane/EtOAc = 2/1) affording (*S,R,S*)-**15** (2.5 mg, 31%) and (*R,R,S*)-**15** (5.0 mg, 62%) as pale yellow oils.

**B:** To a stirred solution of (*R,S*)-**14** (45 mg, 0.92 mmol) in THF (5.0 mL) was added L-selectride 1.0M in THF (1.3 mL, 1.3 mmol) at  $-78\text{ }^\circ\text{C}$ . After being stirred for 3 h, the reaction mixture was quenched with MeOH (1.0 mL) and 2N NaOH (5.0 mL). After being stirred at room temperature for 1 h, the reaction mixture was extracted with Et<sub>2</sub>O (3 x 10 mL). The combined organic layers were washed with brine and dried over MgSO<sub>4</sub>, filtered, and concentrated in vacuo to provide (*S,R,S*)-**15** and (*R,R,S*)-**15** as a 1:3 mixture as determined by crude  $^1\text{H}$  NMR spectroscopy which were separated by flash chromatography (hexanes/EtOAc = 2/1) affording (*S,R,S*)-**15** (13 mg, 28%) and (*R,R,S*)-**15** (31 mg, 69%) as pale yellow oils.

**C:** To a stirred solution of (*R,S*)-**14** (27 mg, 0.055 mmol) in THF (3.0mL) were added (*S*)-CBS reagent 1.0 M in THF (55  $\mu\text{L}$ , 55  $\mu\text{mol}$ ) and BH<sub>3</sub>·THF 1.0M in THF (55  $\mu\text{L}$ , 0.055 mmol) at  $0\text{ }^\circ\text{C}$ . After being stirred for 1 h, the reaction mixture was quenched with MeOH (1.0 mL) and concentrated in vacuo to provide (*S,R,S*)-**15** and (*R,R,S*)-**15** as a 1:4 mixture as determined by crude  $^1\text{H}$  NMR spectroscopy which were separated by flash chromatography (hexane/EtOAc = 2/1) affording (*S,R,S*)-**15** (4.8 mg, 18%) and (*R,R,S*)-**15** (20 mg, 74%) as pale yellow oils.

**D:** To a stirred solution of (*R,S*)-**14** (6.0 mg, 0.012 mmol) in THF (3.0 mL) were added (*R*)-CBS reagent 1.0 M in THF (1.2  $\mu\text{L}$ , 1.2  $\mu\text{mol}$ ) and BH<sub>3</sub>·THF 1.0 M in THF (12  $\mu\text{L}$ , 0.012 mmol) at  $0\text{ }^\circ\text{C}$ . After being stirred for 1h, the reaction mixture was quenched with MeOH (1.0 mL) and concentrated in vacuo to provide (*S,R,S*)-**15** and (*R,R,S*)-**15** as a 20:1 mixture as determined by crude  $^1\text{H}$  NMR spectroscopy, which was purified by flash chromatography (hexane/EtOAc = 2/1) affording (*S,R,S*)-**15** (5.8 mg, 0.11 mmol, 93%) as pale yellow oils.

**E:** To a stirred solution of (*R,S*)-**14** (6.0 mg, 0.012 mmol) in *i*PrOH (3.0mL) was treated with Al(O<sup>*i*</sup>Pr)<sub>3</sub> (25 mg, 0.12 mmol). After heating at reflux for 5 h, the reaction mixture was cooled to room temperature and diluted with Et<sub>2</sub>O (10 mL) and treated with 1N HCl. The mixture was extracted with Et<sub>2</sub>O (3 x 10 ml) and the combined organic layers were washed with saturated aq. NaHCO<sub>3</sub> and brine, and dried over MgSO<sub>4</sub>. The reaction mixture was filtered through a plug of silica gel and concentrated in vacuo to provide a 1:5 mixture of (*S,R,S*)-**15** and (*R,R,S*)-**15** (5.3 mg, 0.011 mmol, 88%) as determined by  $^1\text{H}$  NMR spectroscopy, as a pale yellow oil.

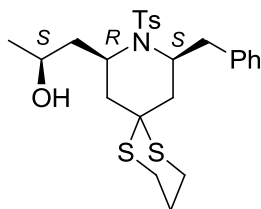

(*S,R,S*)-**15**

(*S,R,S*)-**15**:  $R_f$  0.40 (hexane/EtOAc = 2:1);  $[\alpha]_D^{29} +101.0$  (c 0.67, CHCl<sub>3</sub>); IR (film) 3522 (m, br), 3026 (w), 2922 (s), 1596 (w), 1420 (m), 1327 (s), 1157 (s), 1115 (s), 1043 (s), 932 (m), 813 (m), 756 (m), 702 (s) cm<sup>-1</sup>; <sup>1</sup>H NMR (500 MHz, CDCl<sub>3</sub>)  $\delta$  7.75 (d,  $J = 8.3$  Hz, 2H), 7.36 – 7.32 (m, 4H), 7.30 (d,  $J = 8.0$  Hz, 2H), 7.27 – 7.24 (m, 1H), 4.28 – 4.24 (m, 1H), 4.16 – 4.08 (m, 2H), 3.36 (dd,  $J = 13.0, 10.8$  Hz, 1H), 3.30 (dd,  $J = 13.0, 3.7$  Hz, 1H), 2.82 – 2.72 (m, 2H), 2.66 – 2.57 (m, 2H), 2.41 (s, 3H), 2.32 (t,  $J = 13.4$  Hz, 1H), 2.16 (dd,  $J = 14.9, 5.6$  Hz, 1H), 2.04 (d,  $J = 15.1$  Hz, 1H), 1.93 – 1.78 (m, 2H), 1.72 (dd,  $J = 14.9, 6.3$  Hz, 1H), 1.57 (dd,  $J = 15.0, 7.2$  Hz, 1H), 1.45 (ddd,  $J = 14.2, 10.6, 3.4$  Hz, 1H), 1.22 (d,  $J = 6.3$  Hz, 3H); <sup>13</sup>C NMR (125 MHz, CDCl<sub>3</sub>)  $\delta$  143.96, 138.58, 136.84, 130.08, 129.76, 128.78, 127.27, 126.84, 63.43, 54.81, 49.81, 46.79, 44.58, 43.95, 40.37, 35.77, 27.09, 27.03, 24.74, 22.99, 21.72; HRMS (ES)  $m/z$  492.1688 [(M+H)<sup>+</sup>; calcd for C<sub>25</sub>H<sub>33</sub>NO<sub>3</sub>S<sub>3</sub>: 492.1701].

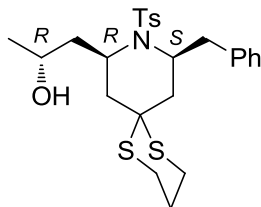

(*R,R,S*)-**15**

(*R,R,S*)-**15**:  $R_f$  0.30 (hexane/EtOAc = 2:1);  $[\alpha]_D^{22} +105.6$  (c 0.50, CHCl<sub>3</sub>); IR (film) 3410 (m, br), 3026 (w), 2925 (s), 1599 (w), 1451 (m), 1326 (s), 1159 (s), 1096 (s), 938 (m), 753 (m), 756 (m), 702 (s) cm<sup>-1</sup>; <sup>1</sup>H NMR (500 MHz, CDCl<sub>3</sub>)  $\delta$  7.75 (d,  $J = 8.3$  Hz, 2H), 7.36 – 7.30 (m, 4H), 7.28 (d,  $J = 8.2$  Hz, 2H), 7.26 – 7.22 (m, 1H), 4.25 – 4.14 (m, 2H), 3.98 – 3.90 (m, 1H), 3.34 (dd,  $J = 13.29, 15.5$  Hz, 1H), 3.32 (s, 1H), 2.78 (dd,  $J = 6.21, 4.99$  Hz, 2H), 2.69 – 2.57 (m, 2H), 2.41 (s, 3H), 2.17 (ddd,  $J = 14.9, 10.6, 4.1$  Hz, 2H), 2.12 – 1.99 (m, 2H), 1.91 – 1.83 (m, 2H), 1.80 (dd,  $J = 15.0, 6.4$  Hz, 2H), 1.74 (dd,  $J = 15.0, 6.7$  Hz, 2H), 1.26 (d,  $J = 6.2$  Hz, 3H); <sup>13</sup>C NMR (125 MHz, CDCl<sub>3</sub>)  $\delta$  143.63, 138.82, 137.20, 129.88, 129.77, 128.73, 127.49, 126.71, 66.42, 54.69, 50.32, 47.17, 44.67, 44.11, 39.08, 36.45, 27.16, 27.05, 24.79, 24.33, 21.69; HRMS (ES)  $m/z$  492.1700 [(M+H)<sup>+</sup>; calcd for C<sub>25</sub>H<sub>34</sub>NO<sub>3</sub>S<sub>3</sub>: 492.1701].



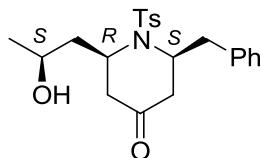

(*S,R,S*)-**16**

(*S,R,S*)-**16**: To a stirred solution of (*S,R,S*)-**15** (43.0 mg, 0.087 mmol) in CH<sub>3</sub>CN-H<sub>2</sub>O (9:1, 5.0 mL) was added PhI(O<sub>2</sub>CCF<sub>3</sub>)<sub>2</sub> (75 mg, 0.18 mmol) at 0 °C. After 5 min, the reaction mixture was quenched with saturated aq. NH<sub>4</sub>Cl (5.0 mL) and extracted with EtOAc (3 x 10 mL) and the combined organic layers were dried over Na<sub>2</sub>SO<sub>4</sub>, filtered, and concentrated in vacuo. Flash chromatography (hexane/EtOAc = 3:1) afforded (*S,R,S*)-**16** (30 mg, 0.075 mmol, 86%) as a white solid: R<sub>f</sub> 0.45 (hexane/EtOAc = 1:1); [α]<sub>D</sub><sup>20</sup> +142.0 (c 0.51, CHCl<sub>3</sub>); IR (film) 3536 (m, br), 3028 (w), 2967 (m), 1719 (s), 1598 (w), 1495 (m), 1453 (m), 1329 (s), 1159 (s), 1105 (s), 927 (m), 855 (m), 700 (m) cm<sup>-1</sup>; <sup>1</sup>H NMR (500 MHz, CDCl<sub>3</sub>) δ 7.80 (d, *J* = 8.3 Hz, 2H), 7.35 (d, *J* = 6.0 Hz, 2H), 7.33 (d, *J* = 5.9 Hz, 2H), 7.28 – 7.24 (m, 3H), 4.75 - 4.68 (m, 1H), 4.61 – 4.55 (m, 1H), 4.11 (dt, *J* = 12.3, 5.3 Hz, 1H), 3.44 (d, *J* = 4.2 Hz, 1H), 3.18 (dd, *J* = 12.8, 3.0 Hz, 1H), 2.78 (dd, *J* = 12.8, 11.4 Hz, 1H), 2.44 (s, 3H), 2.23 (ddd, *J* = 14.4, 3.4, 1.6 Hz, 1H), 2.18 (dd, *J* = 14.5, 7.9 Hz, 1H), 2.09 (d, *J* = 14.5 Hz, 1H), 2.05 (dd, *J* = 14.4, 7.6 Hz, 1H), 1.77 (ddd, *J* = 14.3, 12.5, 1.7 Hz, 1H), 1.48 (ddd, *J* = 14.4, 10.5, 3.9 Hz, 1H), 1.21 (d, *J* = 6.3 Hz, 3H); <sup>13</sup>C NMR (125 MHz, CDCl<sub>3</sub>) δ 206.38, 144.52, 137.38, 137.03, 130.51, 129.72, 129.01, 127.25, 126.82, 63.73, 58.12, 53.11, 46.18, 44.35, 44.31, 41.22, 22.73, 21.73; HRMS (ES) *m/z* 402.1721 [(M+H)<sup>+</sup>; calcd for C<sub>22</sub>H<sub>28</sub>NO<sub>4</sub>S: 402.1739].

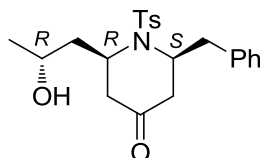

(*R,R,S*)-**16**

(*R,R,S*)-**16**: To a stirred solution of (*R,R,S*)-**15** (30 mg, 0.061 mmol) in CH<sub>3</sub>CN-H<sub>2</sub>O (9:1, 5.0 mL) was added PhI(O<sub>2</sub>CCF<sub>3</sub>)<sub>2</sub> (53 mg, 0.12 mmol) at 0 °C. After 5 min, the reaction mixture was quenched with saturated aq. NH<sub>4</sub>Cl (5.0 mL) and extracted with EtOAc (3 x 10 mL) and the combined organic layers were dried over Na<sub>2</sub>SO<sub>4</sub>, filtered, and concentrated in vacuo. Flash chromatography (hexane/EtOAc = 3:1) afforded (*R,R,S*)-**16** (22 mg, 0.054 mmol, 88%) as a white solid: R<sub>f</sub> 0.40 (hexane/EtOAc = 1:1); [α]<sub>D</sub><sup>20</sup> +142.0 (c 0.51, CHCl<sub>3</sub>); IR (film) 3504 (m, br), 3028 (w), 2967 (m), 1717 (s), 1598 (w), 1494 (m), 1453 (m), 1329 (s), 1160 (s), 1097 (s), 935 (m), 816 (m), 702 (m) cm<sup>-1</sup>; <sup>1</sup>H NMR (500 MHz, CDCl<sub>3</sub>) δ 7.78 (d, *J* = 8.2 Hz, 2H), 7.34 - 7.28 (m, 6H), 7.25 - 7.21 (m, 1H), 4.77 – 4.71 (m, 1H), 4.61 (ddd, *J* = 10.6, 7.1, 3.4 Hz, 1H), 3.88 – 3.81 (m,



The residue was filtered through short a plug of silica gel affording a 2:1 mixture (5.6 mg, 0.014mmol, 93%) of (*S,R,S,R*)-**17** and (*S,R,S,S*)-**17** as a white solid as determined by crude <sup>1</sup>H NMR spectroscopy.

**G:** To a stirred solution of (*S,R,S*)-**16** (15 mg, 0.037 mmol) in THF (5.0mL) was added H<sub>2</sub>O (40 μL, 0.22 mmol). The solution was cooled to -78 °C and treated with a freshly prepared 0.10 M solution of SmI<sub>2</sub> in THF (1.5 mL, 0.15 mmol). The reaction mixture was slowly warmed to room temperature over 5 h. The reaction mixture was quenched with saturated aq. NH<sub>4</sub>Cl (5.0 mL) and extracted with EtOAc (3x10 mL). The combined organic layers were washed with brine and dried over Na<sub>2</sub>SO<sub>4</sub>, then filtered and concentrated in vacuo to provide as a 2:1 mixture as determined by crude <sup>1</sup>H NMR of (*S,R,S,R*)-**17** and (*S,R,S,S*)-**17** which was purified by flash chromatography (hexane/EtOAc, 3:1 to 1:1) affording (*S,R,S,R*)-**17** (8.1 mg, 0.020 mmol, 53%) and (*S,R,S,S*)-**17** (5.3 mg, 0.013 mmol, 35%) as white solids.

(*S,R,S,R*)-**17**: R<sub>f</sub> 0.25 (hexane/EtOAc = 1:1); [α]<sub>D</sub><sup>24</sup> +62.0 (c 1.00, CHCl<sub>3</sub>); IR (film) 3430 (s, br), 2922 (s), 1601 (w), 1417 (w), 1316 (m), 1152 (s), 916 (m), 741 (w), 701 (w) cm<sup>-1</sup>; <sup>1</sup>H NMR (500 MHz, CDCl<sub>3</sub>) δ 7.72 (d, *J* = 8.3 Hz, 2H), 7.34 – 7.29 (m, 4H), 7.27 (d, *J* = 8.1 Hz, 2H), 7.25 – 7.20 (m, 1H), 4.34 (ddd, *J* = 10.8, 7.3, 3.2 Hz, 1H), 4.22 – 4.14 (m, 1H), 4.09 (ddd, *J* = 14.9, 7.1, 3.5 Hz, 1H), 3.76 – 3.70 (m, 1H), 3.61 (brs, 1H), 3.31 (t, *J* = 12.0 Hz, 1H), 3.21 (dd, *J* = 12.4, 3.7 Hz, 1H), 2.43 – 2.35 (m, 1H), 2.41 (s, 3H), 1.64 – 1.53 (m, 5H), 1.26 (d, *J* = 6.3 Hz, 3H), 1.15 (ddd, *J* = 14.2, 7.2, 3.3 Hz, 1H); <sup>13</sup>C NMR (125 MHz, CDCl<sub>3</sub>) δ 143.56, 139.30, 137.91, 130.06, 129.78, 128.71, 126.74, 126.65, 64.55, 63.69, 54.19, 48.61, 47.66, 44.63, 35.15, 30.70, 23.04, 21.66; HRMS (ES) *m/z* 404.1962 [(M+H)<sup>+</sup>; calcd for C<sub>22</sub>H<sub>29</sub>NO<sub>4</sub>S: 403.1817].

(*S,R,S,S*)-**17**: R<sub>f</sub> 0.20 (hexane/EtOAc = 1:1); [α]<sub>D</sub><sup>21</sup> +98.14 (c 0.30, CHCl<sub>3</sub>); IR (film) 3409 (s, br), 3027 (w), 2928 (s), 1598 (w), 1494 (w), 1454 (w), 1402 (w), 1324 (m), 1159 (s), 927 (m), 753 (m), 673 (s) cm<sup>-1</sup>; <sup>1</sup>H NMR (500 MHz, CDCl<sub>3</sub>) δ 7.72 (d, *J* = 8.3 Hz, 2H), 7.36 - 7.33 (m, 2H), 7.29 (dd, *J* = 7.9, 5.1 Hz, 2H), 7.27 – 7.24 (m, 3H), 4.50 – 4.43 (m, 1H), 4.33 – 4.27 (m, 1H), 4.18 – 4.10 (m, 2H), 3.74 (d, *J* = 4.0 Hz, 1H), 3.11 (dd, *J* = 12.8, 3.2 Hz, 1H), 2.81 (app t, *J* = 12.3 Hz, 1H), 2.41 (s, 3H), 1.96 (ddd, *J* = 14.2, 12.3, 1.6 Hz, 1H), 1.81 – 1.72 (m, 2H), 1.48 (ddd, *J* = 14.2, 10.5, 3.6 Hz, 1H), 1.31 (brs, 1H), 1.26 (d, *J* = 6.4 Hz, 3H), 1.12 (ddd, *J* = 12.2, 12.2, 6.4 Hz, 1H), 0.75 (ddd, *J* = 12.1, 12.1, 6.4 Hz, 1H); <sup>13</sup>C NMR (125 MHz, CDCl<sub>3</sub>) δ 143.80, 138.70, 137.79, 130.19, 129.39, 128.94, 127.03, 126.66, 63.60, 61.20, 56.25, 51.10, 45.66, 43.32, 38.37, 33.85, 22.82, 21.68; HRMS (ES) *m/z* 404.1913 [(M+H)<sup>+</sup>; calcd for C<sub>22</sub>H<sub>29</sub>NO<sub>4</sub>S: 403.1817].

## 5. Reduction Conditions of (*R,R,S*)-16

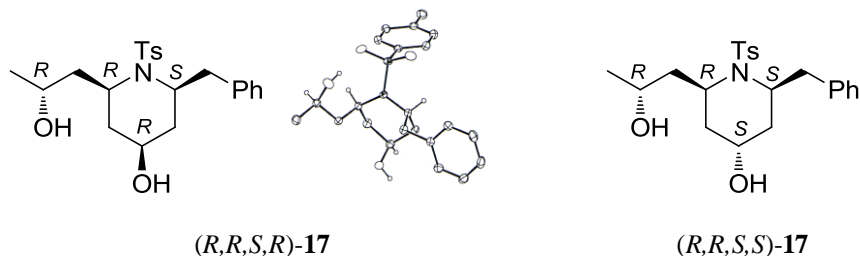

**B:** Following the same reduction conditions **B** of (*S,R,S*)-16, (*R,R,S*)-16 (28 mg, 0.070 mmol) afforded 20:1 mixture as determined by crude  $^1\text{H}$  NMR spectroscopy of (*S,R,S,R*)-17 and (*S,R,S,S*)-17 (27 mg, 0.065 mmol, 93%) as white solids, which was dissolved in  $\text{CH}_2\text{Cl}_2$  (2.0 mL) and put in a  $-20^\circ\text{C}$  refrigerator overnight affording crystals of (*S,R,S,R*)-17.

**G:** Following the same reduction conditions **G** of (*S,R,S*)-16, (*R,R,S*)-16 (18 mg, 0.045 mmol) afforded a 1:1.3 mixture of (*R,R,S,R*)-17 and (*R,R,S,S*)-17 as determined by crude  $^1\text{H}$  NMR spectroscopy which were separated by flash chromatography (hexane/EtOAc, 3:1 to 1:1) affording (*R,R,S,R*)-17 (7.1 mg, 0.018 mmol, 39%) and (*R,R,S,S*)-17 (9.2 mg, 0.023 mmol, 51%) as white solids.

*(R,R,S,R)*-17:  $R_f$  0.40 (hexane/EtOAc = 1:2);  $[\alpha]_D^{29} +40.3$  (c 0.50,  $\text{CHCl}_3$ ); IR (film) 3420 (s, br), 2924 (s), 1598 (w), 1495 (w), 1454 (w), 1323 (m), 1159 (s), 934 (m), 814 (w), 751 (m), 668 (m)  $\text{cm}^{-1}$ ;  $^1\text{H}$  NMR (500 MHz,  $\text{CDCl}_3$ )  $\delta$  7.70 (d,  $J = 8.2$  Hz, 2H), 7.33 – 7.27 (m, 4H), 7.25 (d,  $J = 8.0$  Hz, 2H), 7.24 – 7.19 (m, 1H), 4.29 (td,  $J = 8.5, 2.6$  Hz, 1H), 4.15 (ddd,  $J = 15.6, 7.7, 4.0$  Hz, 1H), 4.00 – 3.92 (m, 1H), 3.73 (qui,  $J = 4.5$  Hz, 1H), 3.34 (dd,  $J = 15.7, 8.4$  Hz, 1H), 3.22 (dd,  $J = 12.6, 3.8$  Hz, 1H), 2.39 (s, 3H), 2.22 (ddd,  $J = 13.0, 9.0, 3.8$  Hz, 1H), 2.09 (ddd,  $J = 14.2, 8.5, 6.0$  Hz, 1H), 1.89 (brs, 1H), 1.73 (m, 1H), 1.63 (m, 2H), 1.36 – 1.33 (ddd,  $J = 14.3, 7.5, 3.8$  Hz, 1H), 1.29 (d,  $J = 6.2$  Hz, 3H), 1.28 – 1.24 (m, 1H);  $^{13}\text{C}$  NMR (125 MHz,  $\text{CDCl}_3$ )  $\delta$  143.28, 139.45, 138.07, 129.88, 129.76, 128.62, 126.90, 126.51, 66.25, 64.71, 53.94, 48.85, 47.58, 44.85, 33.99, 31.57, 24.01, 21.63; HRMS (ES)  $m/z$  426.1718  $[(\text{M}+\text{H})^+]$ ; calcd for  $\text{C}_{22}\text{H}_{29}\text{NO}_4\text{SNa}$ : 426.1715].

*(R,R,S,S)*-17:  $R_f$  0.35 (hexane/EtOAc = 1:2);  $[\alpha]_D^{26} +32.58$  (c 1.00,  $\text{CHCl}_3$ ); IR (film) 3385 (s, br), 2924 (s), 1599 (w), 1457 (w), 1323 (m), 1160 (s), 929 (m), 755 (m), 671 (s)  $\text{cm}^{-1}$ ;  $^1\text{H}$  NMR (500 MHz,  $\text{CDCl}_3$ )  $\delta$  7.71 (d,  $J = 8.1$  Hz, 2H), 7.32 (t,  $J = 7.5$  Hz, 2H), 7.28 – 7.22 (m, 5H), 4.43 (app q,  $J = 6.2$  Hz, 1H), 4.37 – 4.31 (m, 1H), 4.20 – 4.13 (m, 1H), 3.96 – 3.88 (m, 1H), 3.17 (dd,  $J = 12.8, 2.2$  Hz, 1H), 2.87 (t,  $J = 12.4$  Hz, 1H), 2.40 (s, 3H), 1.97 (ddd,  $J = 14.3, 8.7, 5.7$  Hz, 1H), 1.93 – 1.88

(m, 1H), 1.88 – 1.83 (m, 1H), 1.83 – 1.78 (m, 1H), 1.61 (brs, 1H), 1.36 (brs, 1H), 1.30 (d,  $J = 6.2$  Hz, 3H), 1.14 (td,  $J = 12.1$ , 6.1 Hz, 1H), 0.91 (td,  $J = 12.1$ , 6.4 Hz, 1H);  $^{13}\text{C}$  NMR (125 MHz,  $\text{CDCl}_3$ )  $\delta$  143.46, 138.98, 138.19, 129.98, 129.39, 128.85, 126.86, 126.81, 66.29, 61.17, 56.03, 51.07, 46.13, 43.35, 37.19, 34.42, 24.34, 21.65; HRMS (ES)  $m/z$  426.1707  $[(\text{M}+\text{H})^+]$ ; calcd for  $\text{C}_{22}\text{H}_{29}\text{NO}_4\text{NaS}$ : 426.1715].

## 6. Screening Conditions for Intramolecular $\text{S}_\text{N}2$ Cyclization.

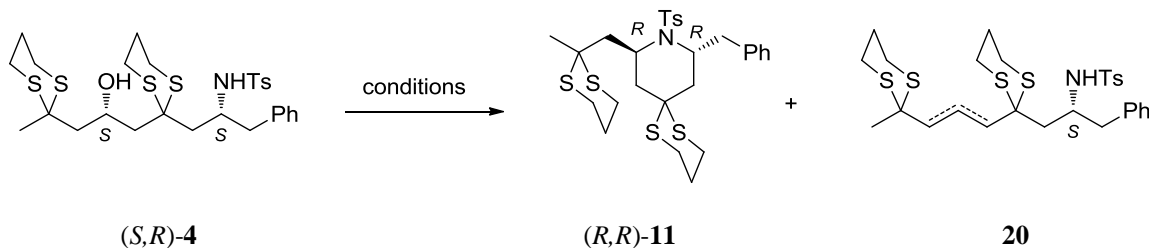

| entry | conditions                                                              | Ratio of $(S,S)$ -11 : 20 | Yield (%) |
|-------|-------------------------------------------------------------------------|---------------------------|-----------|
| 1     | MsCl, TEA, THF, 0 °C;<br>K <sub>2</sub> CO <sub>3</sub> , MeOH, rt, 12h | 20 only                   | 77        |
| 2     | MsCl, TEA, THF, 0 °C;<br>tBuOK, DMF, 0 °C-rt, 5h                        | 1:10                      | 77        |
| 3     | MsCl, TEA, THF, 0 °C;<br>tBuOK, THF, rt, 5h                             | 1:10                      | 74        |
| 4     | MsCl, TEA, THF, 0 °C;<br>tBuOK, Toluene, 0 °C-rt, 5h                    | 1:7.4                     | 84        |
| 5     | MsCl, TEA, THF, 0 °C;<br>NaH, THF/HMPA (1:4), rt, 5h                    | 1:5.6                     | 66        |
| 6     | MsCl, TEA, THF, 0 °C;<br>DBU, DMF, rt, 12h                              | 1:10                      | 84        |
| 7     | MsCl, TEA, THF, 0 °C;<br>DBU, THF, 12h                                  | 1:10                      | 85        |
| 8     | MsCl, TEA, THF, 0 °C;<br>DBU, CHCl <sub>3</sub> , 12h                   | 1:10                      | 85        |

|    |                                                                            |                                    |     |
|----|----------------------------------------------------------------------------|------------------------------------|-----|
| 9  | MsCl, TEA, THF, 0 °C;<br>DBU, Toluene, 12h                                 | 1:7                                | 81  |
| 10 | MsCl, TEA, THF, 0 °C;<br>NaH, THF, rt, 5h                                  | 2:1                                | 82  |
| 11 | MsCl, TEA, THF, 0 °C;<br>NaH, Toluene, 12h                                 | 1:3.5                              | 79  |
| 12 | Tf <sub>2</sub> O, pyr, DCM, 0 °C<br>NaHMDS, THF, 0 °C- rt, 5h             | ( <i>R,S</i> )- <b>4</b> recovered | >90 |
| 13 | Tf <sub>2</sub> O, pyr, DCM, 0 °C<br>NaH, THF, 0 °C- rt, 5h                | ( <i>R,S</i> )- <b>4</b> recovered | >90 |
| 14 | Tf <sub>2</sub> O, pyr, DCM, 0 °C<br>DBU, CHCl <sub>3</sub> , 0 °C- rt, 5h | ( <i>R,S</i> )- <b>4</b> recovered | >90 |
| 15 | DIAD, PPh <sub>3</sub> , THF                                               | 1:10                               | 77  |

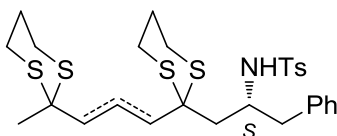

**20**

**20:** HRMS (ES)  $m/z$  580.1497 [(M+H)<sup>+</sup>; calcd for C<sub>28</sub>H<sub>38</sub>NO<sub>2</sub>S<sub>5</sub>: 580.1506].

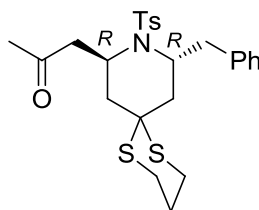

(*R,R*)-**14**

(*R,R*)-**14**: To a stirred solution of (*R,R*)-**11** (60 mg, 0.10 mmol) in THF/H<sub>2</sub>O (4:1, 13 mL) were added 2,6-lutidine (66 μL, 0.62 mmol) and Hg(ClO<sub>4</sub>)<sub>2</sub> (83 mg, 0.21 mmol) at 0 °C. After 30 min, the reaction mixture was filtered through celite and rinsed with EtOAc (3 x 10 mL). The combined organics were poured into saturated aqueous NH<sub>4</sub>Cl (20 mL) and extracted with EtOAc (3 x 20 mL). The combined organic layers were washed with brine (5.0 mL), dried over MgSO<sub>4</sub>, filtered, and

concentrated in vacuo. Flash chromatography on silica gel (hexanes/EtOAc, 100/1 to 2/1) provided (*R,R*)-**14** (31 mg, 0.063 mmol, 61% yield) as a pale yellow oil:  $R_f$  0.37 (hexane/EtOAc = 4:1);  $[\alpha]_D^{21} +4.93$  (c 0.86, CHCl<sub>3</sub>); IR (film) 3027 (w), 2923 (s), 1718 (s), 1305 (s), 1151 (s), 1095 (m), 815 (w), 750 (m), 659 (m) cm<sup>-1</sup>; <sup>1</sup>H NMR (500 MHz, CDCl<sub>3</sub>)  $\delta$  7.34 (d,  $J$  = 8.3 Hz, 2H), 7.29 – 7.20 (m, 3H), 7.18 – 7.15 (m, 3H), 7.13 (d,  $J$  = 8.0 Hz, 3H), 4.54 – 4.48 (m, 1H), 4.43 – 4.37 (m, 1H), 3.34 (dd,  $J$  = 13.7, 7.4 Hz, 1H), 3.16 (dd,  $J$  = 13.8, 8.3 Hz, 1H), 3.10 (dd,  $J$  = 18.2, 6.0 Hz, 1H), 3.05 (dd,  $J$  = 18.5, 8.7 Hz, 1H), 2.99 – 2.87 (m, 1H), 2.74 (ddd,  $J$  = 14.6, 6.5, 3.1 Hz, 1H), 2.64 (ddd,  $J$  = 14.4, 6.9, 3.0 Hz, 1H), 2.38 (s, 3H), 2.35 (dd,  $J$  = 14.0, 2.7 Hz, 1H), 2.25 (dd,  $J$  = 14.1, 9.2 Hz, 1H), 2.16 (d,  $J$  = 4.5 Hz, 3H), 2.05 (s, 1H), 2.02 – 1.95 (m, 1H), 1.93 – 1.85 (m, 1H); <sup>13</sup>C NMR (125 MHz, CDCl<sub>3</sub>)  $\delta$  205.56, 143.21, 139.65, 139.07, 129.65, 129.58, 128.70, 127.25, 126.56, 57.32, 48.73, 48.14, 46.47, 40.80, 39.77, 39.02, 30.46, 26.59, 26.47, 25.15, 21.59; HRMS (ES)  $m/z$  512.1345 [(M+Na)<sup>+</sup>; calcd for C<sub>25</sub>H<sub>31</sub>NO<sub>3</sub>S<sub>3</sub>Na: 512.1364].

#### 7. Screening Conditions for the Reduction of (*R,R*)-**14**.

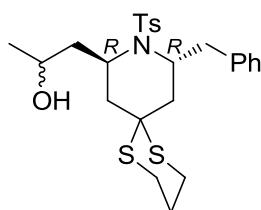

(*S,R,R*)-**15**/*(R,R,R)*-**15**

| entry | conditions                                        | Ratio of ( <i>S,R,R</i> )- <b>15</b> :( <i>R,R,R</i> )- <b>15</b> | Yield (%) |
|-------|---------------------------------------------------|-------------------------------------------------------------------|-----------|
| 1     | NaBH <sub>4</sub> , MeOH                          | 2:1                                                               | 77        |
| 2     | L-Selectride, THF, -78 °C to rt.                  | 3:1                                                               | 77        |
| 3     | Al(OiPr) <sub>3</sub> , iPrOH, reflux             | 1.8:1                                                             | 96        |
| 4     | LiAlH(OEt) <sub>3</sub> , THF, -78 °C to rt.      | 4.5:1                                                             | 84        |
| 5     | ( <i>S</i> )-CBS, BH <sub>3</sub> ·THF, THF, 0 °C | 1:3                                                               | 66        |
| 6     | ( <i>R</i> )-CBS, BH <sub>3</sub> ·THF, THF, 0 °C | 5:1                                                               | 93        |

Entry 1: To a stirred solution of (*R,R*)-**14** (20 mg, 0.041 mmol) in MeOH (1.0 mL) was treated with NaBH<sub>4</sub> (2.3 mg, 0.061 mmol) at 0 °C. After being stirred for 30 min, the reaction mixture was concentrated in vacuo and filtered through a plug of silica gel affording a 1:2 mixture of (*S,R,R*)-**15** and (*R,R,R*)-**15** (18 mg, 0.037 mmol, 90%) as a pale yellow oil.

1:2 mixture of (*S,R,R*)-**15**/*(R,R,R)*-**15**: <sup>1</sup>H NMR (500 MHz, CDCl<sub>3</sub>) δ 7.55 (d, *J* = 7.6 Hz, 0.65H), 7.39 (d, *J* = 8.0 Hz, 1.35H), 7.29 (m, 4.30H), 7.18 (d, *J* = 7.1 Hz, 1.35H), 7.14 (d, *J* = 8.2 Hz, 1.35H), 4.43 – 4.33 (m, 1H), 4.28 (dt, *J* = 11.4, 7.2 Hz, 0.68H), 4.16 (m, 0.33 H), 3.85 – 3.76 (m, 0.68H), 3.79 – 3.72 (m, 0.33 H), 3.58 (dd, *J* = 13.8, 6.0 Hz, 0.33H), 3.39 (dd, *J* = 13.7, 7.1 Hz, 0.68H), 3.08 (dd, *J* = 13.7, 8.9 Hz, 0.68H), 3.05 (dd, *J* = 13.9, 9.9 Hz, 0.33H), 2.81 – 2.68 (m, 1.68 H), 2.68 – 2.63 (s, 0.33H), 2.55– 2.48 (m, 1H), 2.41 (s, 1H), 2.38 (s, 2H), 2.28 (dt, *J* = 14.3, 4.8 Hz, 2H), 2.23 – 2.11 (m, 2H), 1.99 – 1.94 (m, 1.35H), 1.93 – 1.87 (m, 1.35H), 1.87 – 1.74 (m, 1H), 1.47 (ddd, *J* = 14.3, 10.0, 3.9 Hz, 0.33H), 1.20 (d, *J* = 6.1 Hz, 2H), 1.15 (d, *J* = 6.2 Hz, 1H); HRMS (ES) *m/z* 492.1676 [(M+H)<sup>+</sup>; calcd for C<sub>25</sub>H<sub>34</sub>NO<sub>3</sub>S<sub>3</sub>: 492.1701].

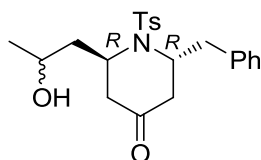

(*S,R,R*)-**16**/*(R,R,R)*-**16**

(*S,R,R*)-**16**/*(R,R,R)*-**16**: To a stirred solution of a mixture of (*S,R,R*)-**15** and (*R,R,R*)-**15** (18 mg, 0.037 mmol) in CH<sub>3</sub>CN/H<sub>2</sub>O (9:1, 5.0 mL) was added PhI(O<sub>2</sub>CCF<sub>3</sub>)<sub>2</sub> (52 mg, 0.12 mmol) at 0 °C. After 5 min, the reaction mixture was quenched with saturated aqueous NH<sub>4</sub>Cl (5.0 mL) and extracted with EtOAc (3 x 10 mL) and the combined organics were dried over Na<sub>2</sub>SO<sub>4</sub>, filtered and concentrated in vacuo. Flash chromatography (hexane:EtOAc=3:1) afforded a 1:2 mixture of (*S,R,R*)-**16** and (*R,R,R*)-**16** (13 mg, 0.031 mmol, 84%): HRMS (ES) *m/z* 402.1731 [(M+H)<sup>+</sup>; calcd for C<sub>22</sub>H<sub>28</sub>NO<sub>4</sub>S: 402.1739].

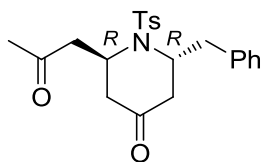

(*R,R*)-**18**

(*R,R*)-**18**: To a stirred solution of (*R,R*)-**11** (120 mg, 0.21 mmol) in CH<sub>3</sub>CN/H<sub>2</sub>O (4:1, 12 mL) was added the solution of N-chlorosuccinimide (110 mg, 0.83 mmol) and AgNO<sub>3</sub> (160 mg, 0.93 mmol) in CH<sub>3</sub>CN-H<sub>2</sub>O (4:1, 5.0 mL) at 0 °C. After 5 min, the reaction was treated with saturated aqueous Na<sub>2</sub>SO<sub>3</sub> (1.0mL), saturated aq. NaHCO<sub>3</sub> (1.0 mL) and brine (1.0 mL), successively. The reaction mixture was filtered through celite and extracted with Et<sub>2</sub>O (3 x 10 mL). The combined organic



layers were dried over Na<sub>2</sub>SO<sub>4</sub>. Flash chromatography (hexane:EtOAc, 6:1 to 2:1) afforded (*R,R*)-**18** (73 mg, 0.18 mmol, 88%) as a colorless oil: R<sub>f</sub> 0.30 (hexane/EtOAc = 3:1); [α]<sub>D</sub><sup>24</sup> +116.85 (c 0.50, CHCl<sub>3</sub>); IR (film) 3026 (w), 2923 (m), 1717 (s), 1598 (w), 1495 (w), 1304 (s), 1150 (s), 1095 (s), 1074 (s), 979 (m), 750 (m), 714 (m) cm<sup>-1</sup>; <sup>1</sup>H NMR (500 MHz, CDCl<sub>3</sub>) δ 7.51 (d, *J* = 8.3 Hz, 2H), 7.30 – 7.23 (m, 3H), 7.22 (d, *J* = 8.4 Hz, 2H), 7.12 – 7.09 (m, 2H), 4.58 (dddd, *J* = 9.4, 6.3, 6.3, 3.1 Hz, 1H), 4.52 (dddd, *J* = 8.5, 8.5, 4.2, 4.2 Hz, 1H), 3.15 (dd, *J* = 18.0, 4.7 Hz, 1H), 3.12 (dd, *J* = 14.1, 5.4 Hz, 1H), 2.70 (dd, *J* = 18.0, 8.4 Hz, 1H), 2.67 – 2.59 (m, 2H), 2.52 (dd, *J* = 15.8, 3.9 Hz, 1H), 2.49 (dd, *J* = 15.9, 3.1 Hz, 1H), 2.40 (s, 3H), 2.02 (s, 3H); <sup>13</sup>C NMR (125 MHz, CDCl<sub>3</sub>) δ 206.06, 204.66, 143.93, 138.63, 137.21, 129.95, 129.37, 128.92, 127.30, 127.05, 56.72, 49.13, 48.12, 45.55, 43.66, 40.97, 30.31, 21.62; HRMS (ES) *m/z* 400.1579 [(M+H)<sup>+</sup>; calcd for C<sub>22</sub>H<sub>26</sub>NO<sub>4</sub>S: 400.1583].

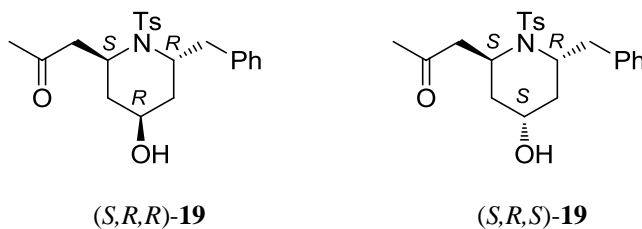

(*S,R,R*)-**19** and (*S,R,S*)-**19**: To a stirred solution of (*R,R*)-**18** (73 mg, 0.18 mmol) in THF (5.0 mL) was added LiAl(OEt)<sub>3</sub> (0.5 M in THF, 0.44 mL, 0.22 mmol) at -78 °C. The reaction mixture was warmed to room temperature for 3h, quenched with 1N HCl and extracted with Et<sub>2</sub>O (3 x 10 mL). The combined organic layers were washed with brine and dried over MgSO<sub>4</sub>. Flash chromatography (hexane:EtOAc, 3:1 to 1:2) afforded (*S,R,R*)-**19** (16 mg, 0.040mmol, 22%) and (*S,R,S*)-**19** (27 mg, 0.067mmol, 37%) as colorless oils.

(*S,R,R*)-**19**: R<sub>f</sub> 0.30 (hexane/EtOAc = 1:1); [α]<sub>D</sub><sup>25</sup> +44.92 (c 1.00, CHCl<sub>3</sub>); IR (film) 3420 (m, br), 3031 (w), 2929 (m), 1717 (s), 1599 (w), 1496 (m), 1455 (m), 1309 (s), 1154 (s), 1095 (s), 985 (m), 863 (m), 700 (m) cm<sup>-1</sup>; <sup>1</sup>H NMR (500 MHz, CDCl<sub>3</sub>) δ 7.30 – 7.25 (m, 3H), 7.23 (dd, *J* = 7.6, 1.7 Hz, 2H), 7.15 – 7.11 (m, 2H), 7.09 (d, *J* = 8.1 Hz, 2H), 4.54 (qd, *J* = 8.0, 2.5 Hz, 1H), 4.19 – 4.09 (m, 2H), 3.08 – 3.01 (m, 2H), 2.86 (dd, *J* = 9.3, 7.8 Hz, 1H), 2.83 (dd, *J* = 13.8, 7.8 Hz, 1H), 2.36 (s, 3H), 2.02 – 1.96 (m, 1H), 1.98 (s, 3H), 1.93 – 1.88 (m, 1H), 1.71 – 1.63 (m, 2H), 1.62 (brs, 1H); <sup>13</sup>C NMR (125 MHz, CDCl<sub>3</sub>) δ 205.52, 143.15, 139.86, 138.62, 129.63, 129.34, 128.82, 127.17, 126.70, 65.50, 57.30, 49.10, 46.65, 40.01, 38.29, 36.96, 30.46, 21.57; HRMS (ES) *m/z* 402.1727 [(M+H)<sup>+</sup>; calcd for C<sub>22</sub>H<sub>28</sub>NO<sub>4</sub>S: 402.1739].

(*S,R,S*)-**19**: R<sub>f</sub> 0.30 (hexane/EtOAc = 1:1); [α]<sub>D</sub><sup>25</sup> +43.09 (c 1.35, CHCl<sub>3</sub>); IR (film) 3412 (m, br), 3062 (w), 3026 (w), 2924 (m), 1713 (s), 1600 (w), 1309 (m), 1152 (s), 1097 (s), 971 (m), 816 (m), 704 (m) cm<sup>-1</sup>; <sup>1</sup>H NMR (500 MHz, CDCl<sub>3</sub>) δ



7.06 (d,  $J = 8.1$  Hz, 2H), 4.62 (tt,  $J = 9.0, 9.0, 4.5, 4.5$  Hz, 1H), 4.13 (dq,  $J = 9.0, 4.5, 4.5, 4.5$  Hz, 1H), 3.88 (dddd,  $J = 9.7, 9.7, 4.2, 3.1$  Hz, 1H), 3.81 – 3.73 (m, 1H), 3.08 (dd,  $J = 13.7, 8.9$  Hz, 1H), 2.85 (dd,  $J = 13.7, 7.4$  Hz, 1H), 2.36 (s, 3H), 2.11 (dt,  $J = 13.0, 3.1$  Hz, 1H), 2.05 (dt,  $J = 13.4, 3.9$  Hz, 1H), 1.93 (ddd,  $J = 13.1, 9.7, 3.1$  Hz, 1H), 1.75 – 1.65 (m, 3H), 1.46 (d,  $J = 4.6$  Hz, 1H), 1.32 (d,  $J = 4.9$  Hz, 1H), 1.14 (d,  $J = 6.2$  Hz, 3H);  $^{13}\text{C}$  NMR (125 MHz,  $\text{CDCl}_3$ )  $\delta$  142.84, 140.64, 138.86, 129.48, 129.37, 128.86, 127.08, 126.68, 65.92, 65.52, 56.78, 51.60, 42.29, 38.55, 38.24, 37.77, 24.57, 21.58; HRMS (ES)  $m/z$  426.1705 [(M+H) $^+$ ]; calcd for  $\text{C}_{22}\text{H}_{29}\text{NO}_4\text{SNa}$ : 426.1715].

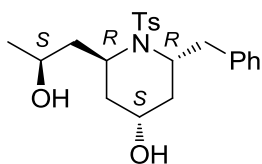

(*S,R,R,S*)-**17**

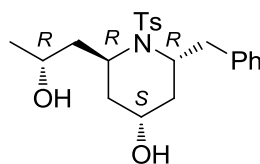

(*R,R,R,S*)-**17**

(*S,R,R,S*)-**17** and (*R,R,R,S*)-**17**: To a stirred solution of (*S,R,S*)-**19** (27 mg, 0.067 mmol) in THF (4.0 mL) was added  $\text{BH}_3\cdot\text{THF}$  (1.0 M in THF, 84  $\mu\text{L}$ , 0.084 mmol) at 0  $^\circ\text{C}$ . After being stirred for 1 h, the reaction mixture was quenched with MeOH (1.0 mL) and concentrated in vacuo filtered through a plug of silica gel to afford a 1:1 mixture of (*R,R,R,S*)-**17** and (*S,R,R,S*)-**17** (25 mg, 0.062 mmol, 93%) as a white solid, which was separated by SFC affording (*S,R,R,R*)-**17** (12 mg) and (*R,R,R,S*)-**17** (6.7 mg).

(*S,R,R,S*)-**17**:  $R_f$  0.23 (hexane/EtOAc = 1:1);  $[\alpha]_D^{26} +20.14$  (c 0.48,  $\text{CH}_2\text{Cl}_2$ ); IR (film) 3391 (s, br), 3028 (w), 2927 (m), 1600 (w), 1496 (w), 1454 (m), 1317 (s), 1150 (s), 1086 (m), 854 (w), 814 (w), 715 (m)  $\text{cm}^{-1}$ ;  $^1\text{H}$  NMR (500 MHz,  $\text{CDCl}_3$ )  $\delta$  7.62 (d,  $J = 8.2$  Hz, 2H), 7.32 – 7.26 (m, 2H), 7.26 – 7.20 (m, 3H), 7.15 (d,  $J = 7.1$  Hz, 2H), 4.52 (app dt,  $J = 9.5, 4.4$  Hz, 1H), 3.85 – 3.77 (m, 2H), 3.68 – 3.62 (m, 1H), 3.59 (dd,  $J = 13.1, 5.3$  Hz, 1H), 2.88 (dd,  $J = 13.1, 9.8$  Hz, 1H), 2.46 – 2.42 (m, 1H), 2.41 (s, 3H), 2.01 – 1.94 (ddd,  $J = 13.6, 11.2, 2.4$  Hz, 1H), 1.90 – 1.81 (m, 2H), 1.46 (ddd,  $J = 11.9, 9.1, 4.6$  Hz, 1H), 1.43 – 1.35 (m, 2H), 1.30 (dt,  $J = 12.8, 9.6$  Hz, 1H), 1.16 (d,  $J = 6.2$  Hz, 3H);  $^{13}\text{C}$  NMR (126 MHz,  $\text{CDCl}_3$ )  $\delta$  143.48, 139.91, 139.29, 129.89, 129.53, 128.74, 127.32, 126.73, 66.01, 64.10, 56.49, 51.97, 41.26, 40.07, 37.83, 37.34, 23.42, 21.66; HRMS (ES)  $m/z$  426.1695 [(M+H) $^+$ ]; calcd for  $\text{C}_{22}\text{H}_{29}\text{NO}_4\text{SNa}$ : 426.1715].

(*R,R,R,S*)-**17**:  $R_f$  0.23 (hexane/EtOAc = 1:1);  $[\alpha]_D^{26} +12.63$  (c 0.55,  $\text{CHCl}_3$ ); IR (film) 3389 (s, br), 3062 (w), 3025 (w), 2927 (m), 1599 (w), 1316 (m), 1149 (s), 854 (w), 815 (w), 750 (m)  $\text{cm}^{-1}$ ;  $^1\text{H}$  NMR (500 MHz,  $\text{CDCl}_3$ )  $\delta$  7.36 (d,  $J = 8.2$  Hz,

2H), 7.29 – 7.20 (m, 3H), 7.13 (t,  $J = 7.1$  Hz, 4H), 4.41 – 4.33 (m, 1H), 4.05 (m, 2H), 3.82 (m, 1H), 3.35 (dd,  $J = 13.4, 6.9$  Hz, 1H), 2.90 (dd,  $J = 13.4, 8.6$  Hz, 1H), 2.55 (brs, 1H), 2.37 (s, 3H), 2.18 (brs, 1H), 2.04 (ddd,  $J = 13.4, 6.8, 4.3$  Hz, 1H), 1.97 (dt,  $J = 13.6, 4.1$  Hz, 1H), 1.80 – 1.66 (m, 3H), 1.61 (dt,  $J = 13.7, 6.9$  Hz, 1H), 1.17 (d,  $J = 6.2$  Hz, 2H);  $^{13}\text{C}$  NMR (500 MHz,  $\text{CDCl}_3$ )  $\delta$  143.06, 140.47, 139.33, 129.60, 129.56, 128.73, 127.13, 126.57, 65.90, 65.55, 56.93, 50.81, 41.67, 39.94, 36.85, 36.78, 24.06, 21.59; HRMS (ES)  $m/z$  426.1695  $[(\text{M}+\text{H})^+]$ ; calcd for  $\text{C}_{22}\text{H}_{29}\text{NO}_4\text{SNa}$ : 426.1715].

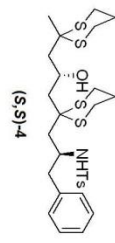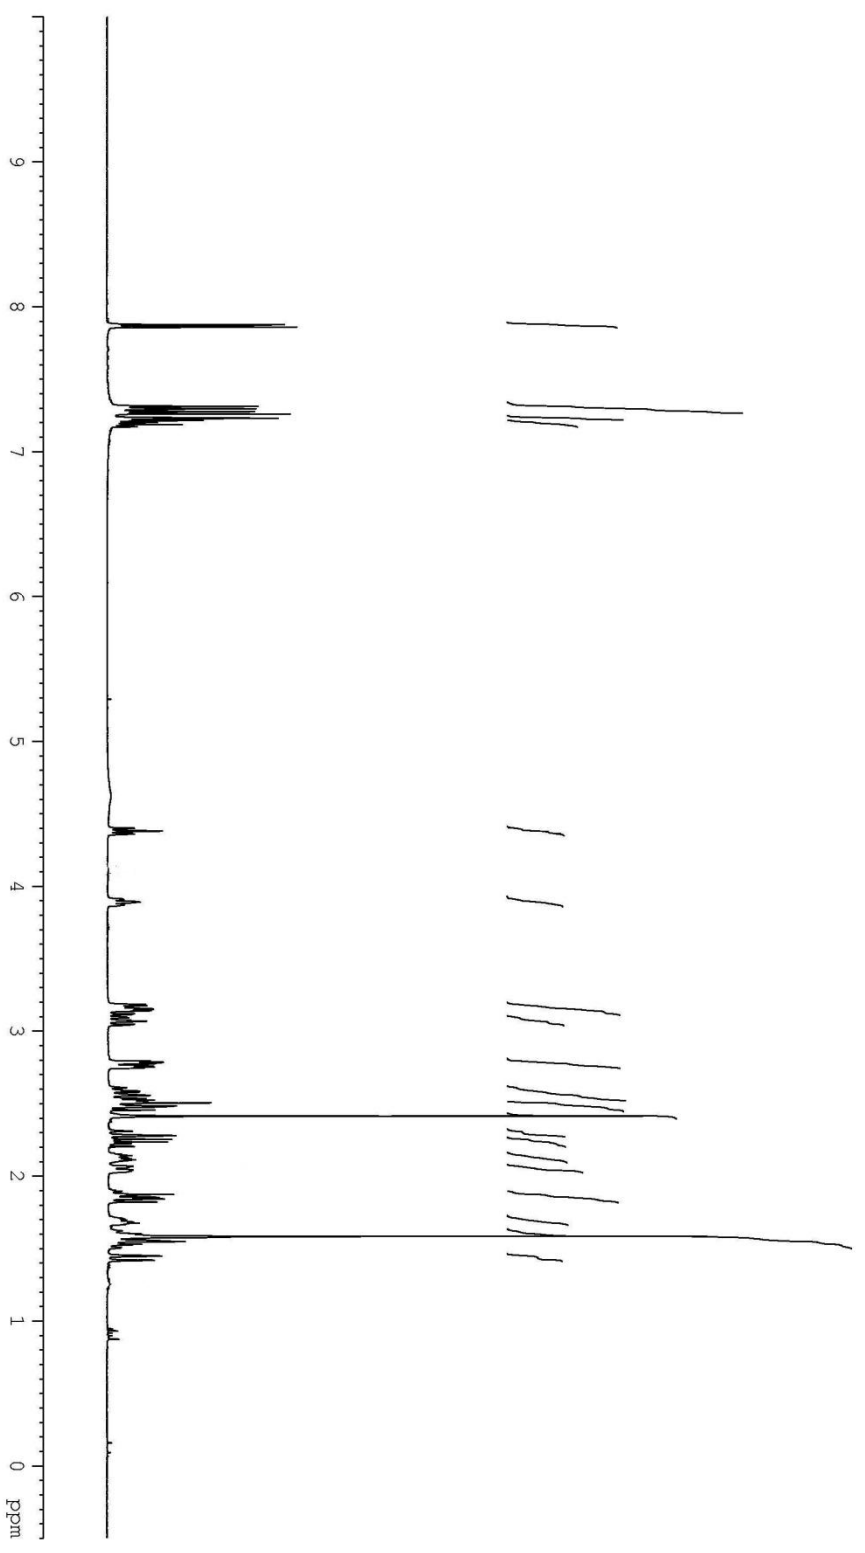

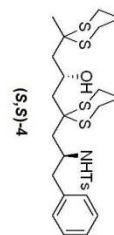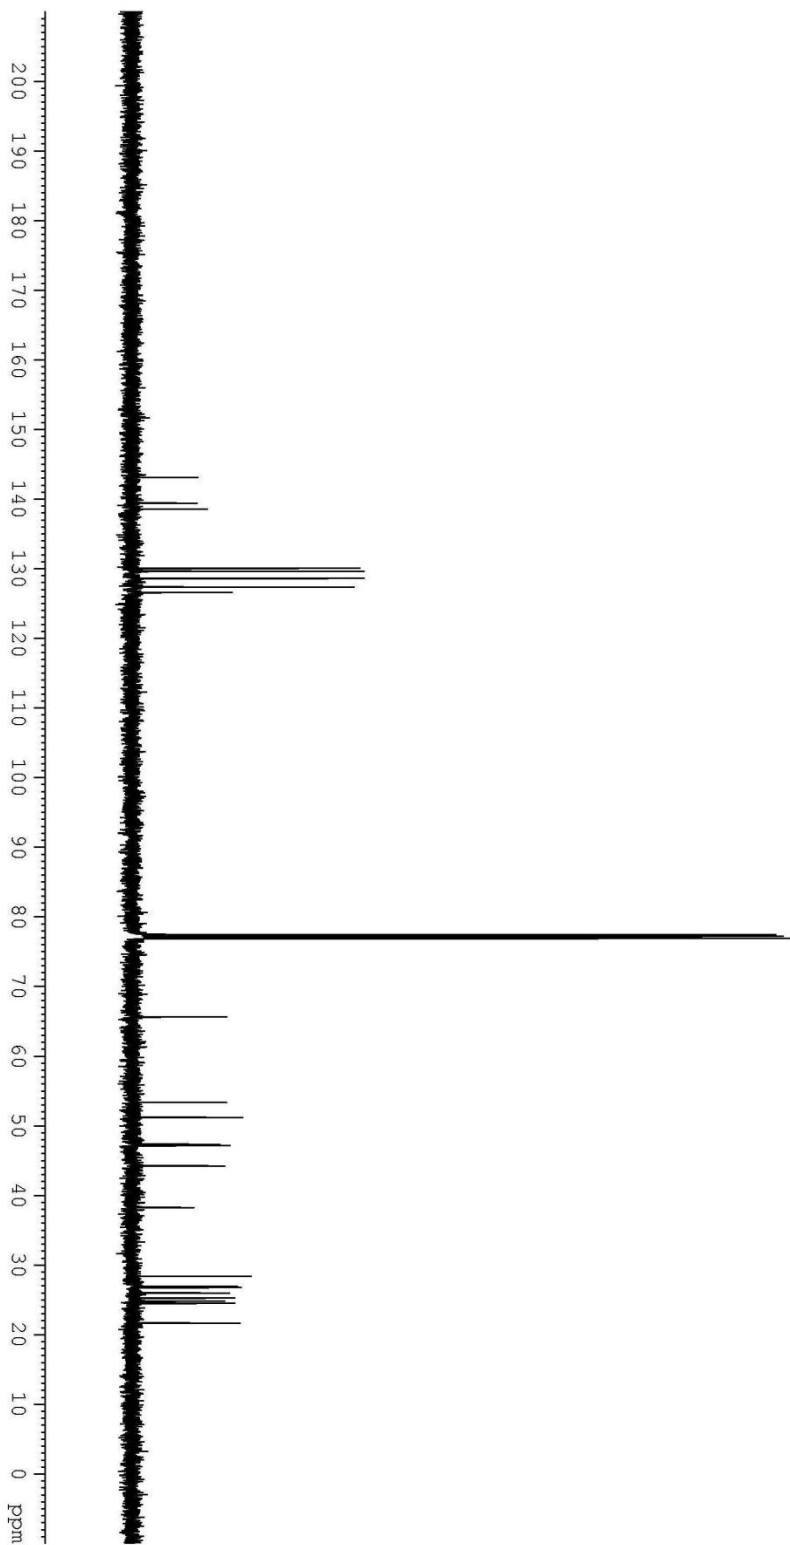

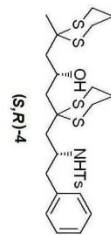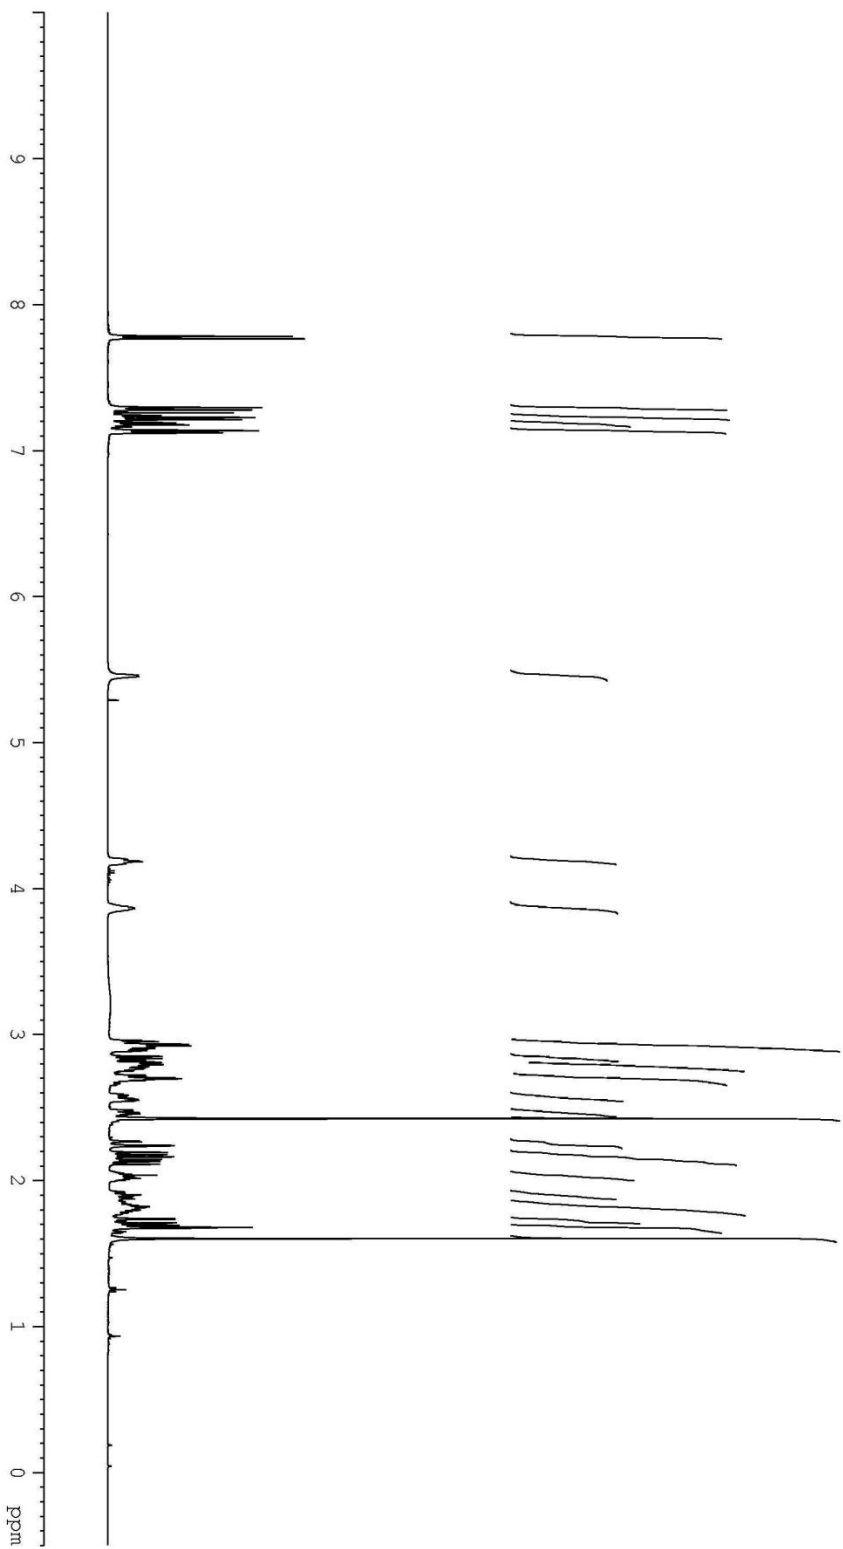

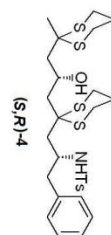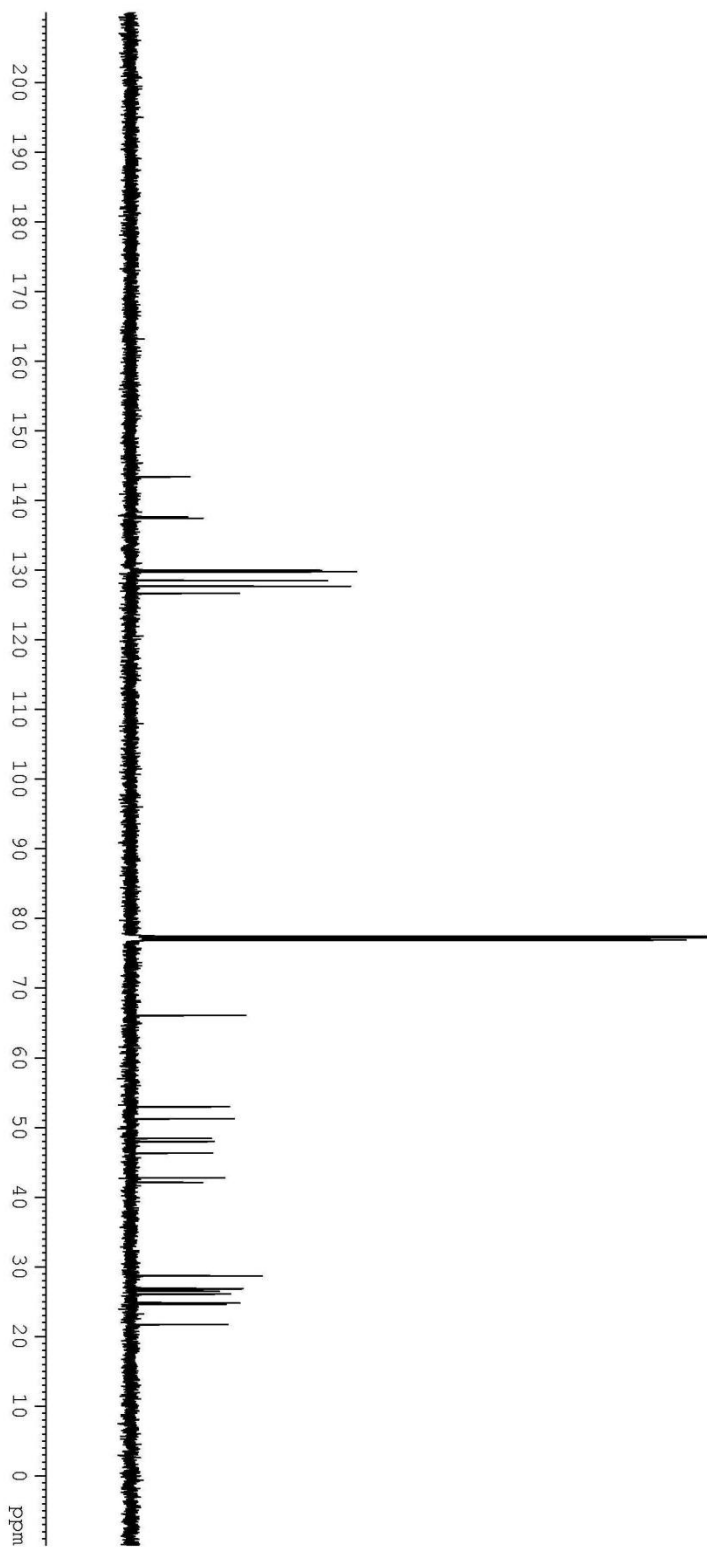



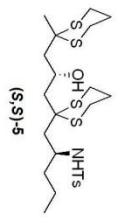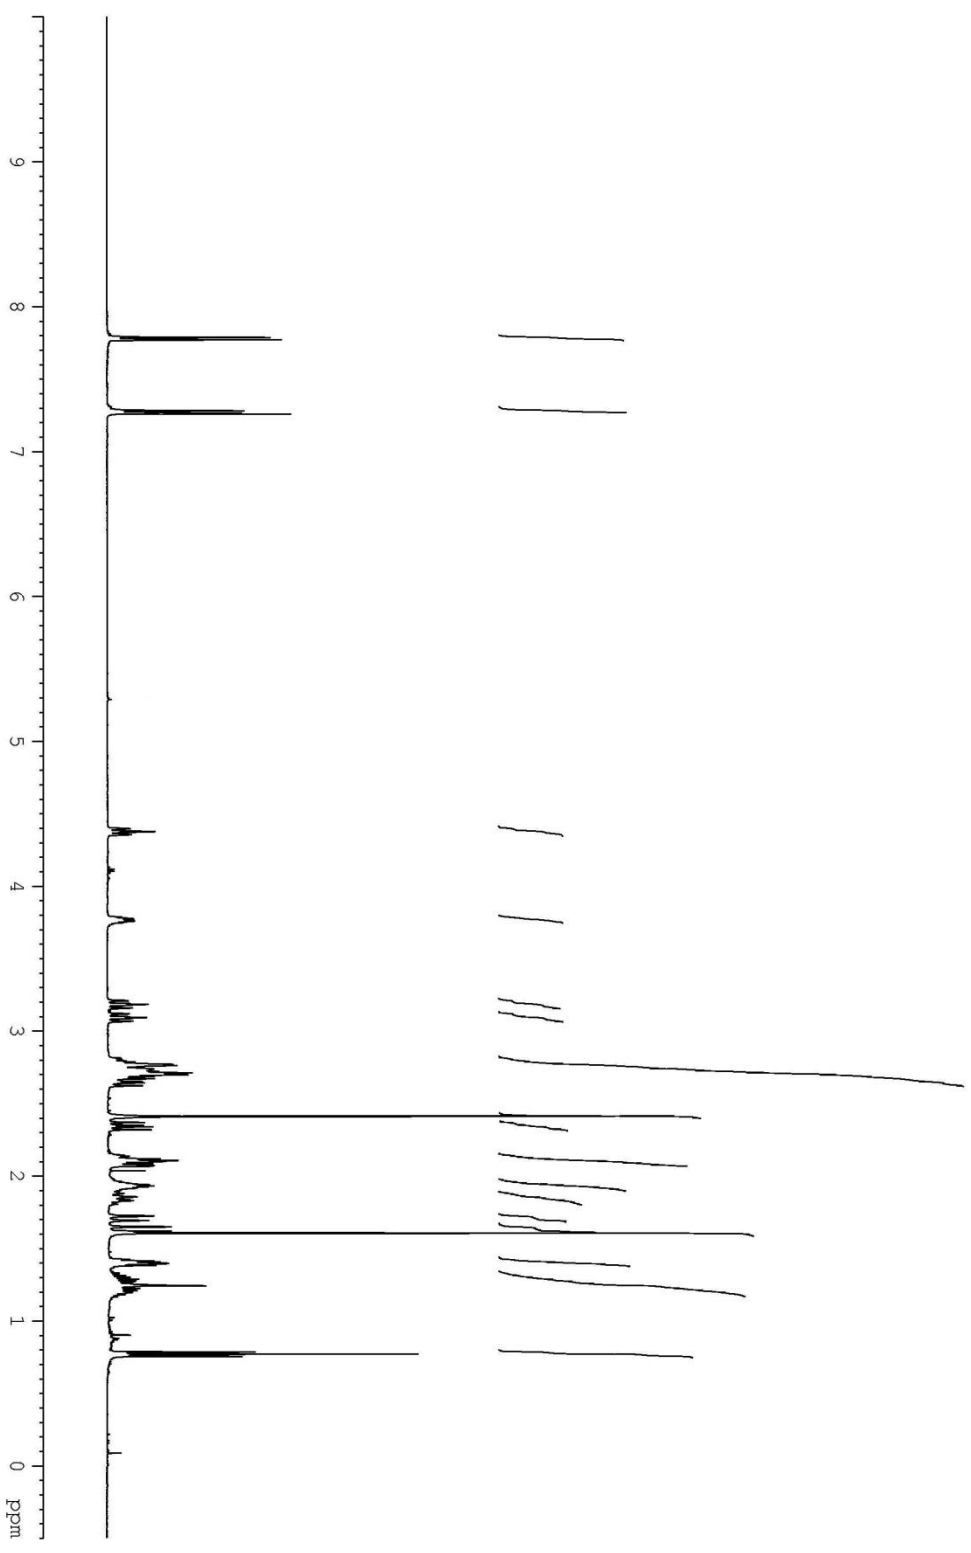

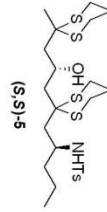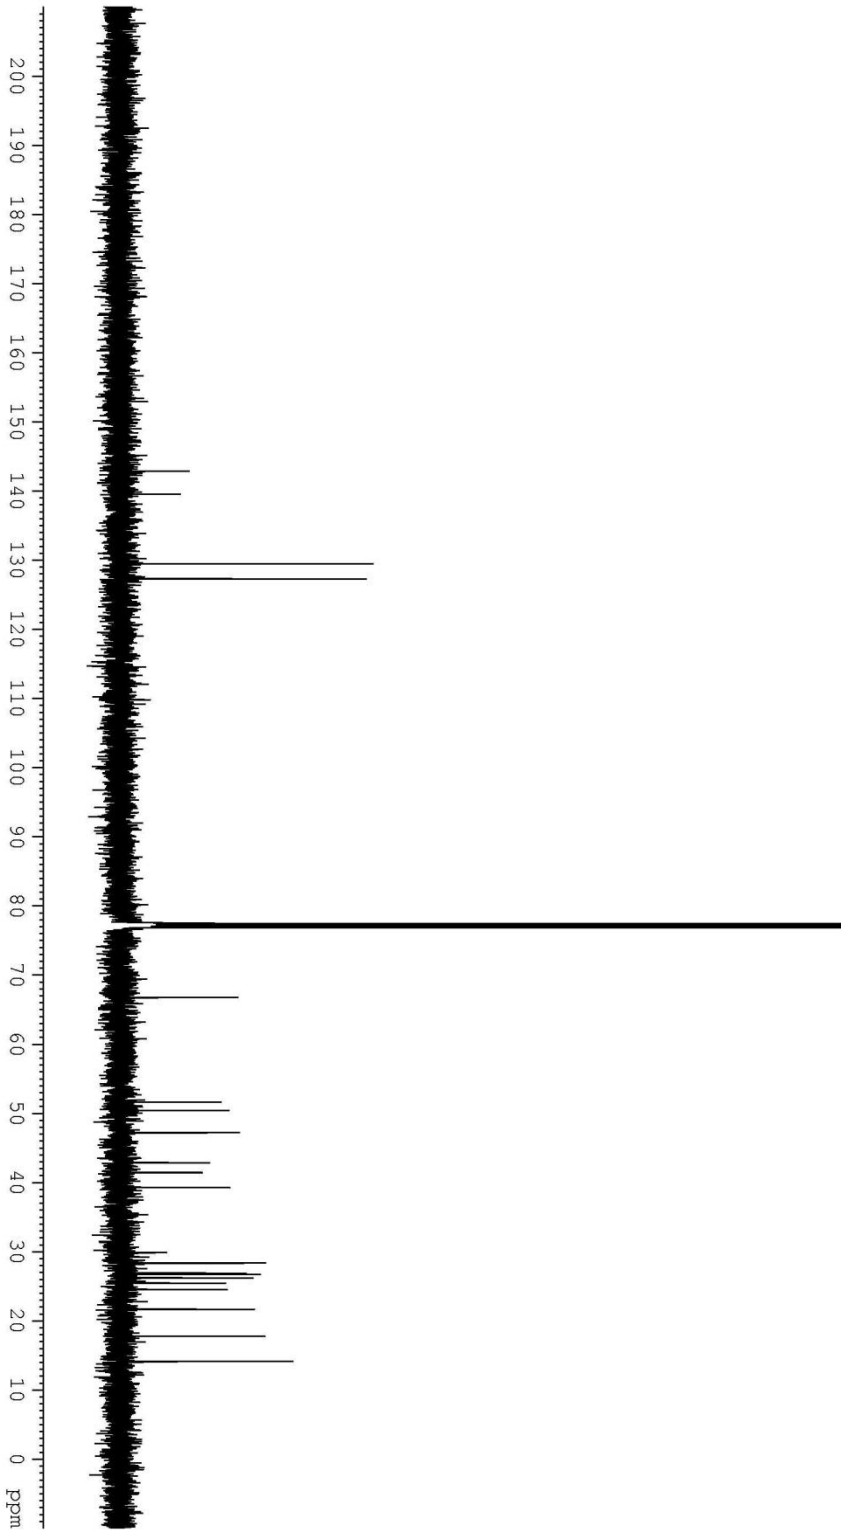

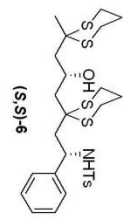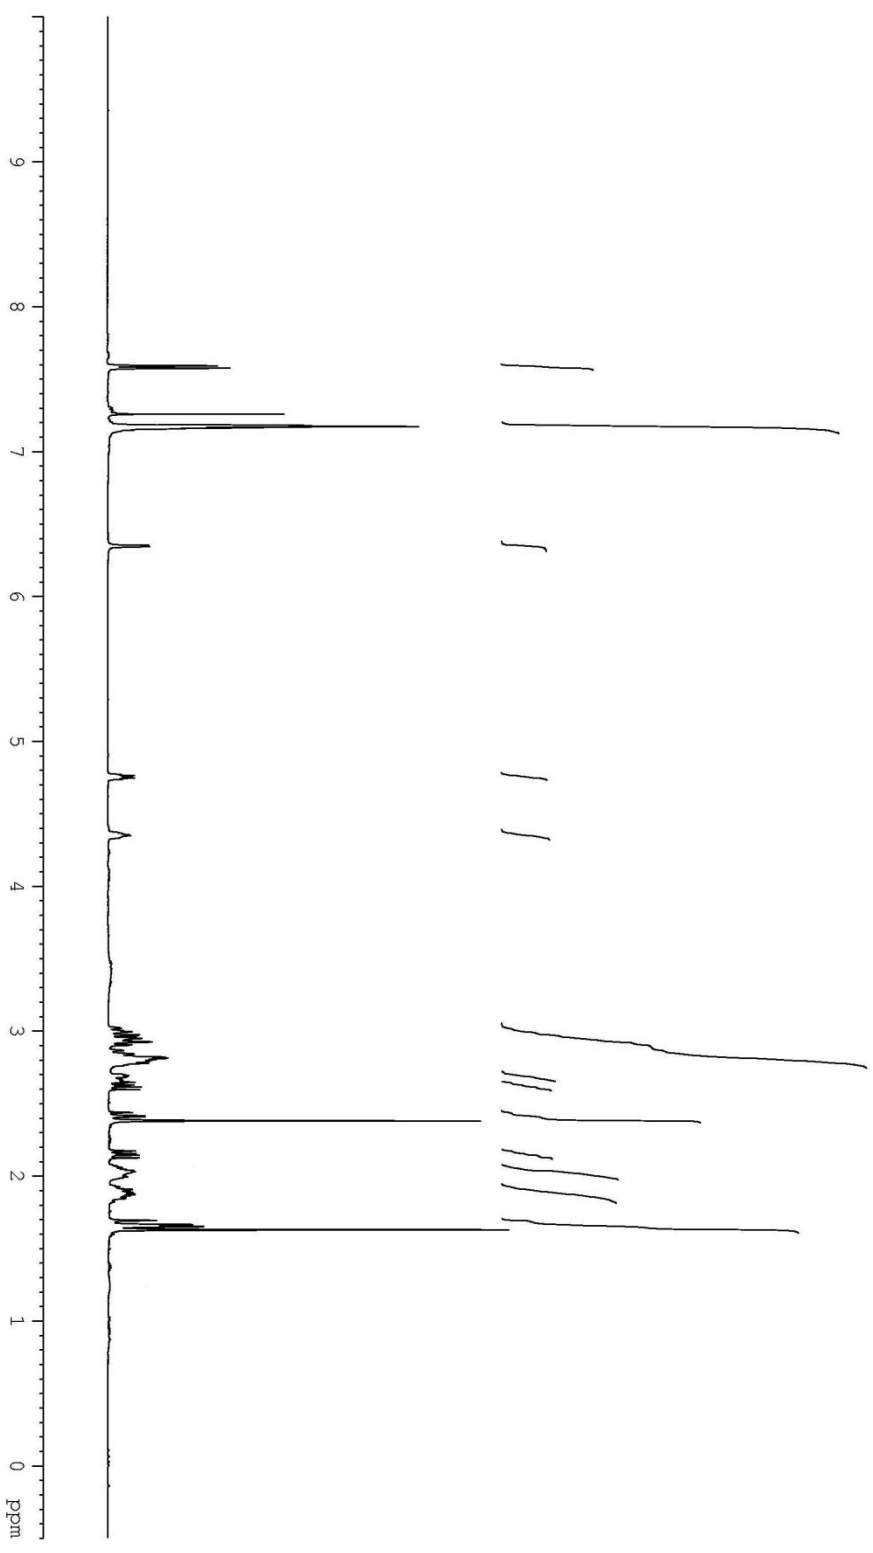

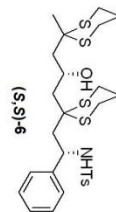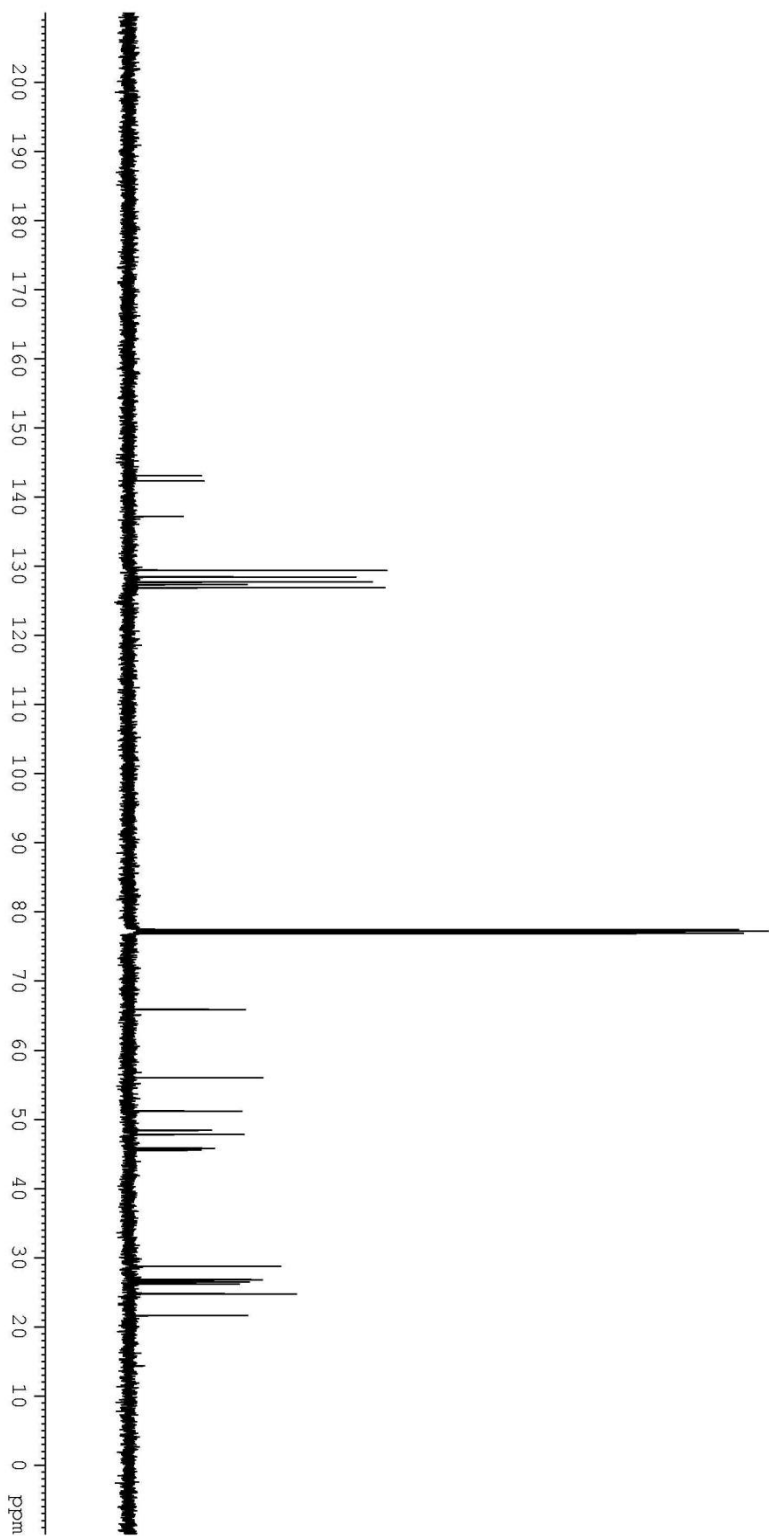

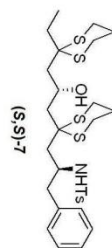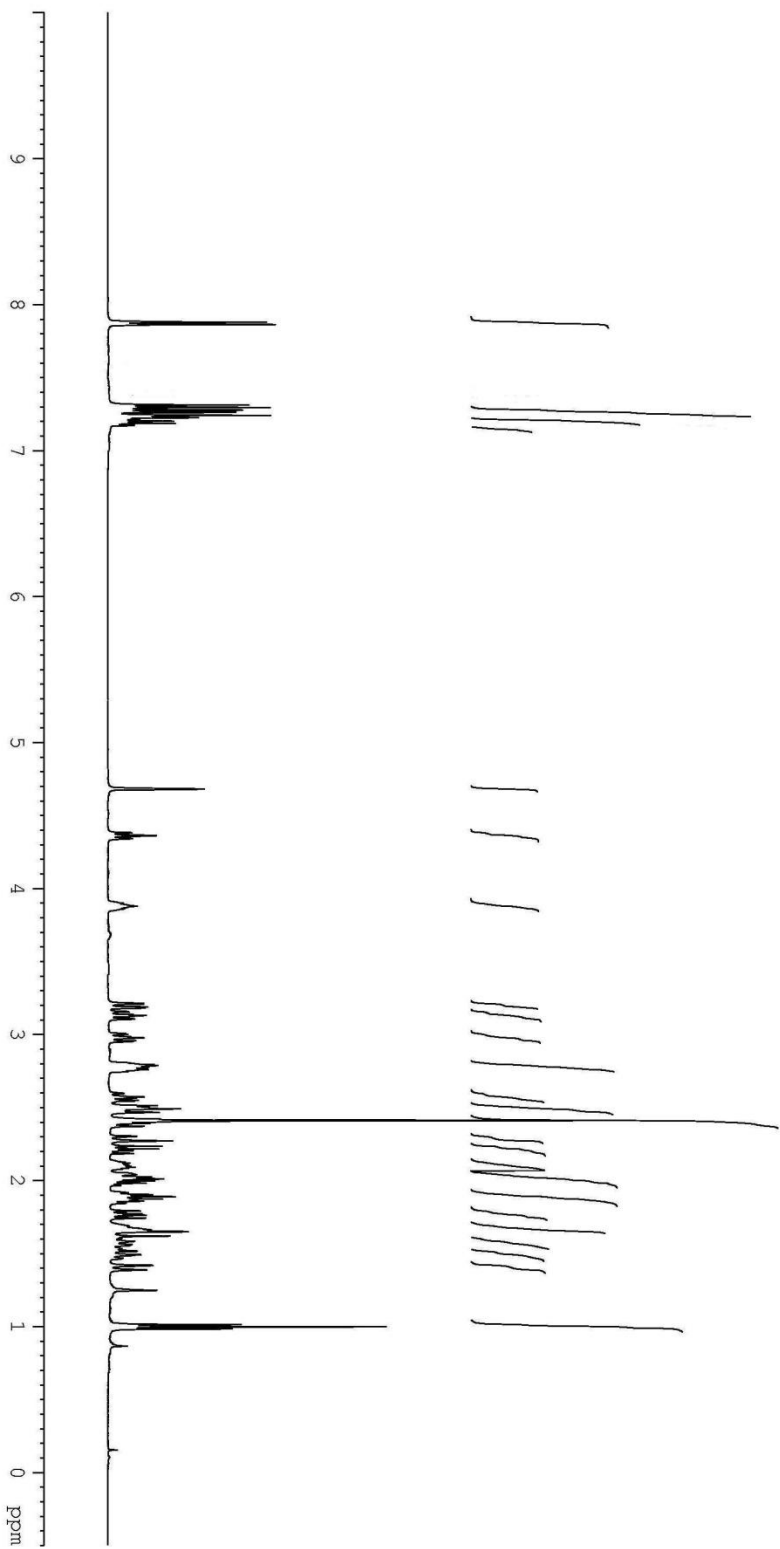

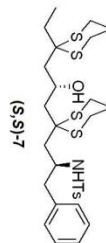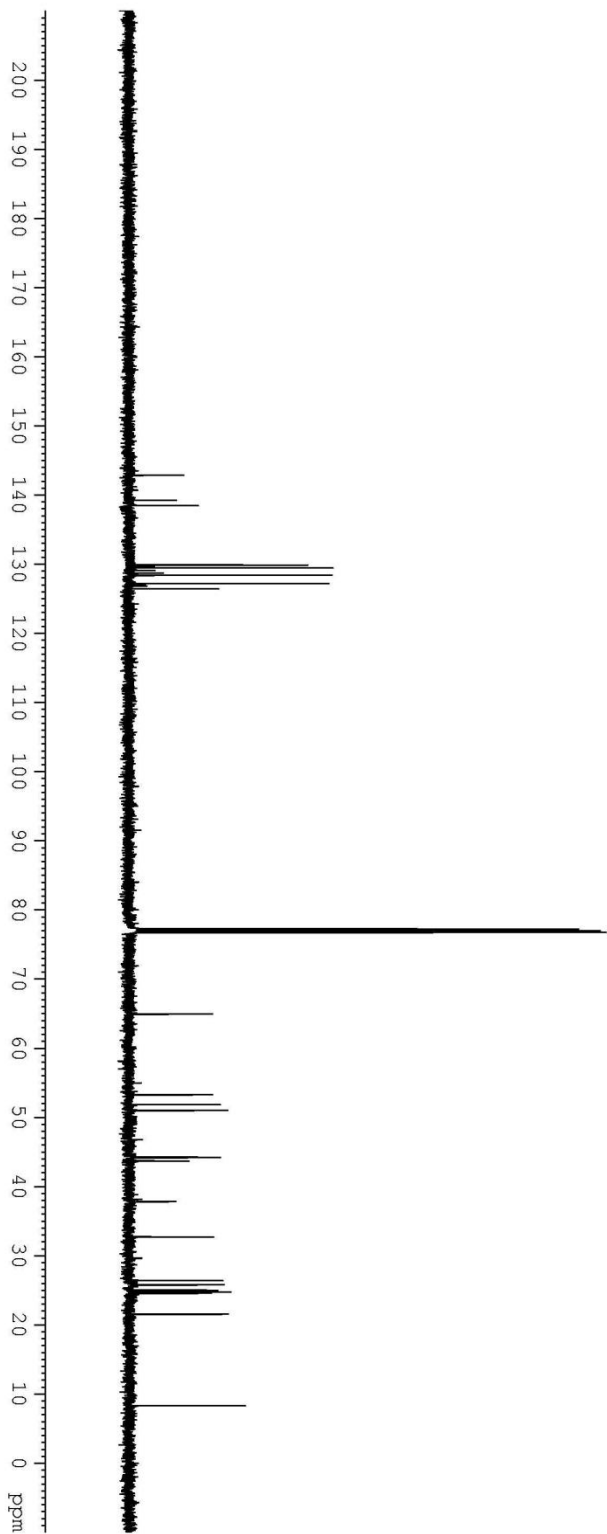

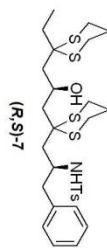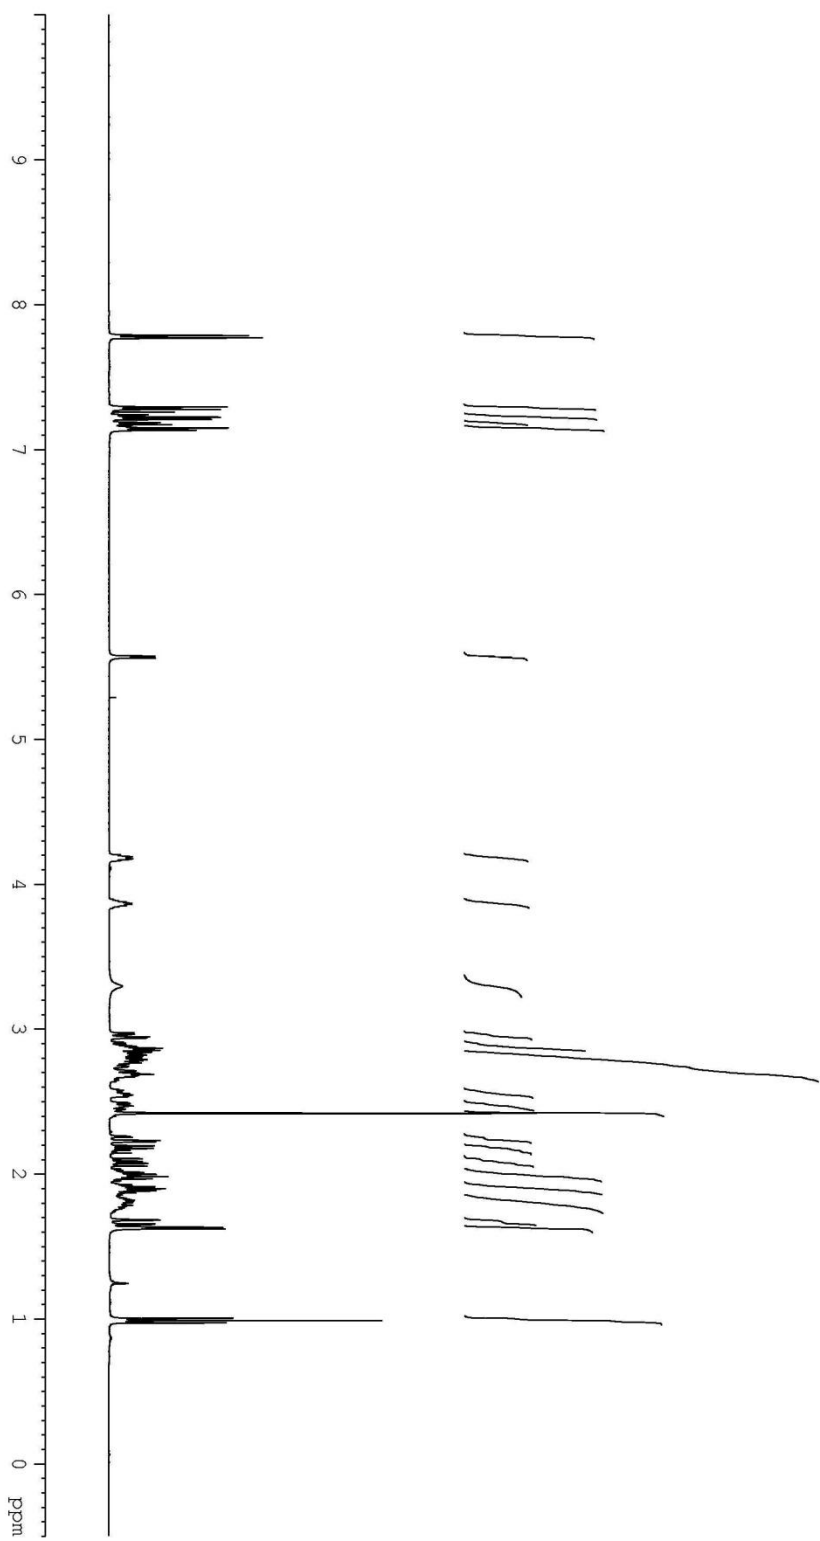

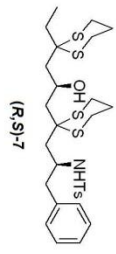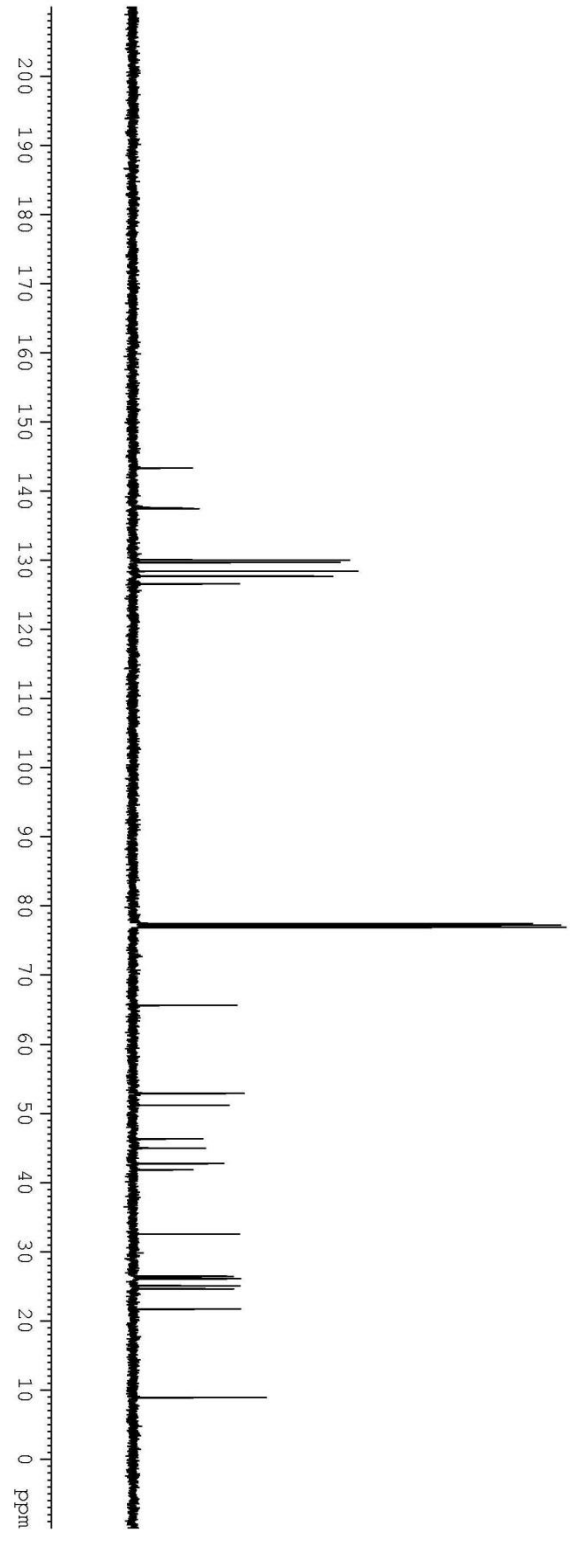



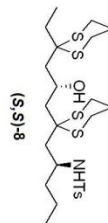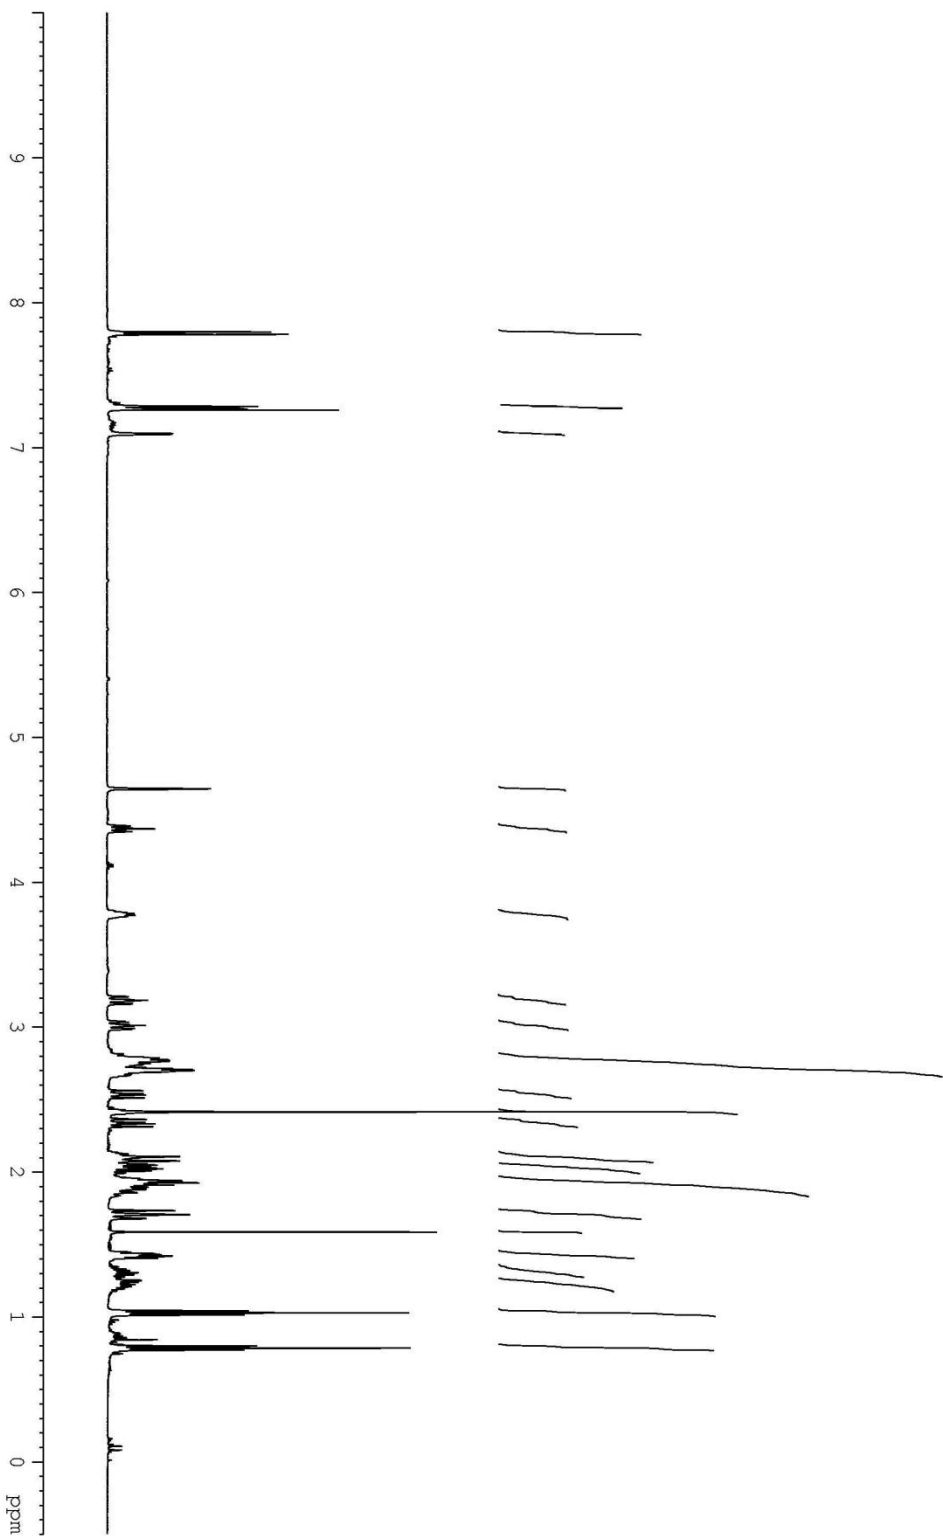

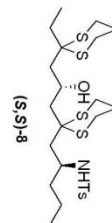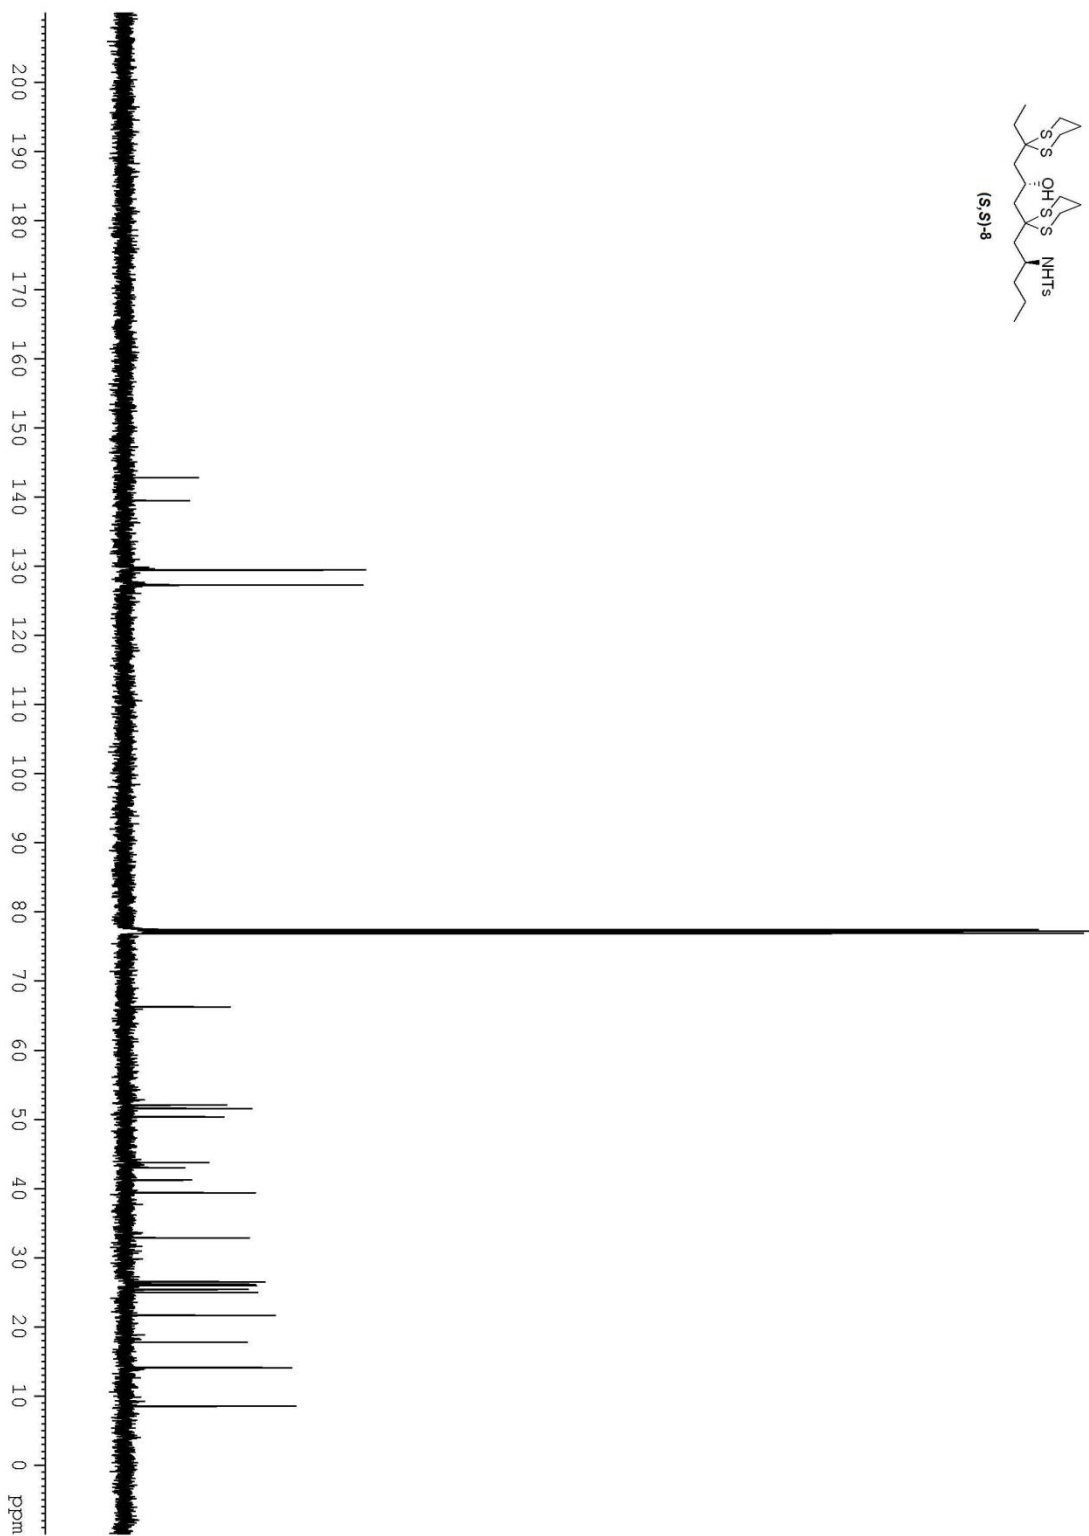

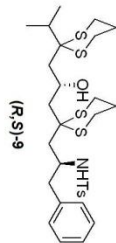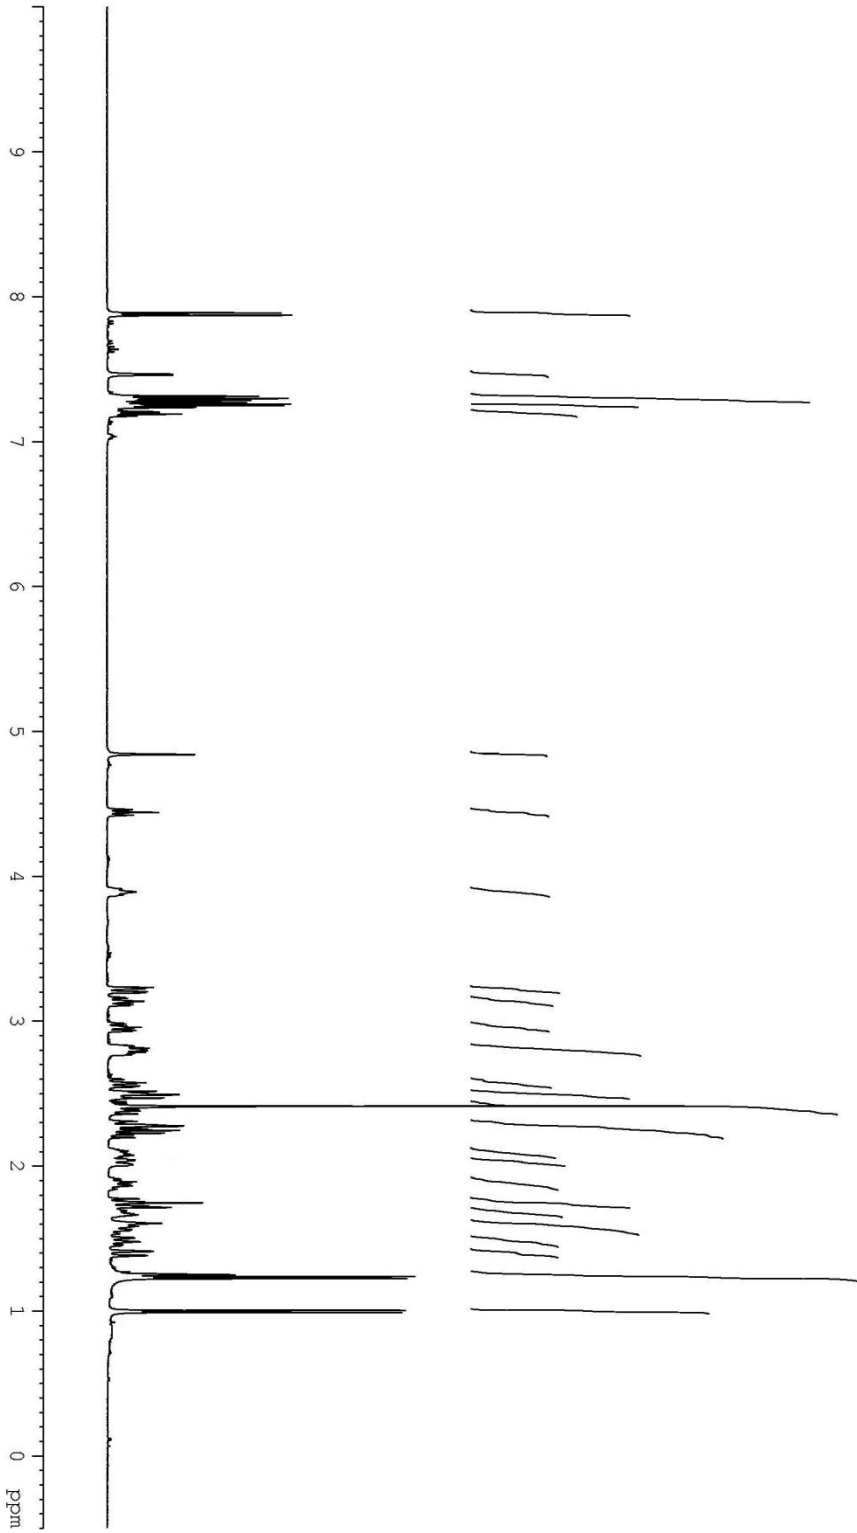

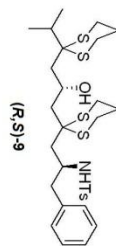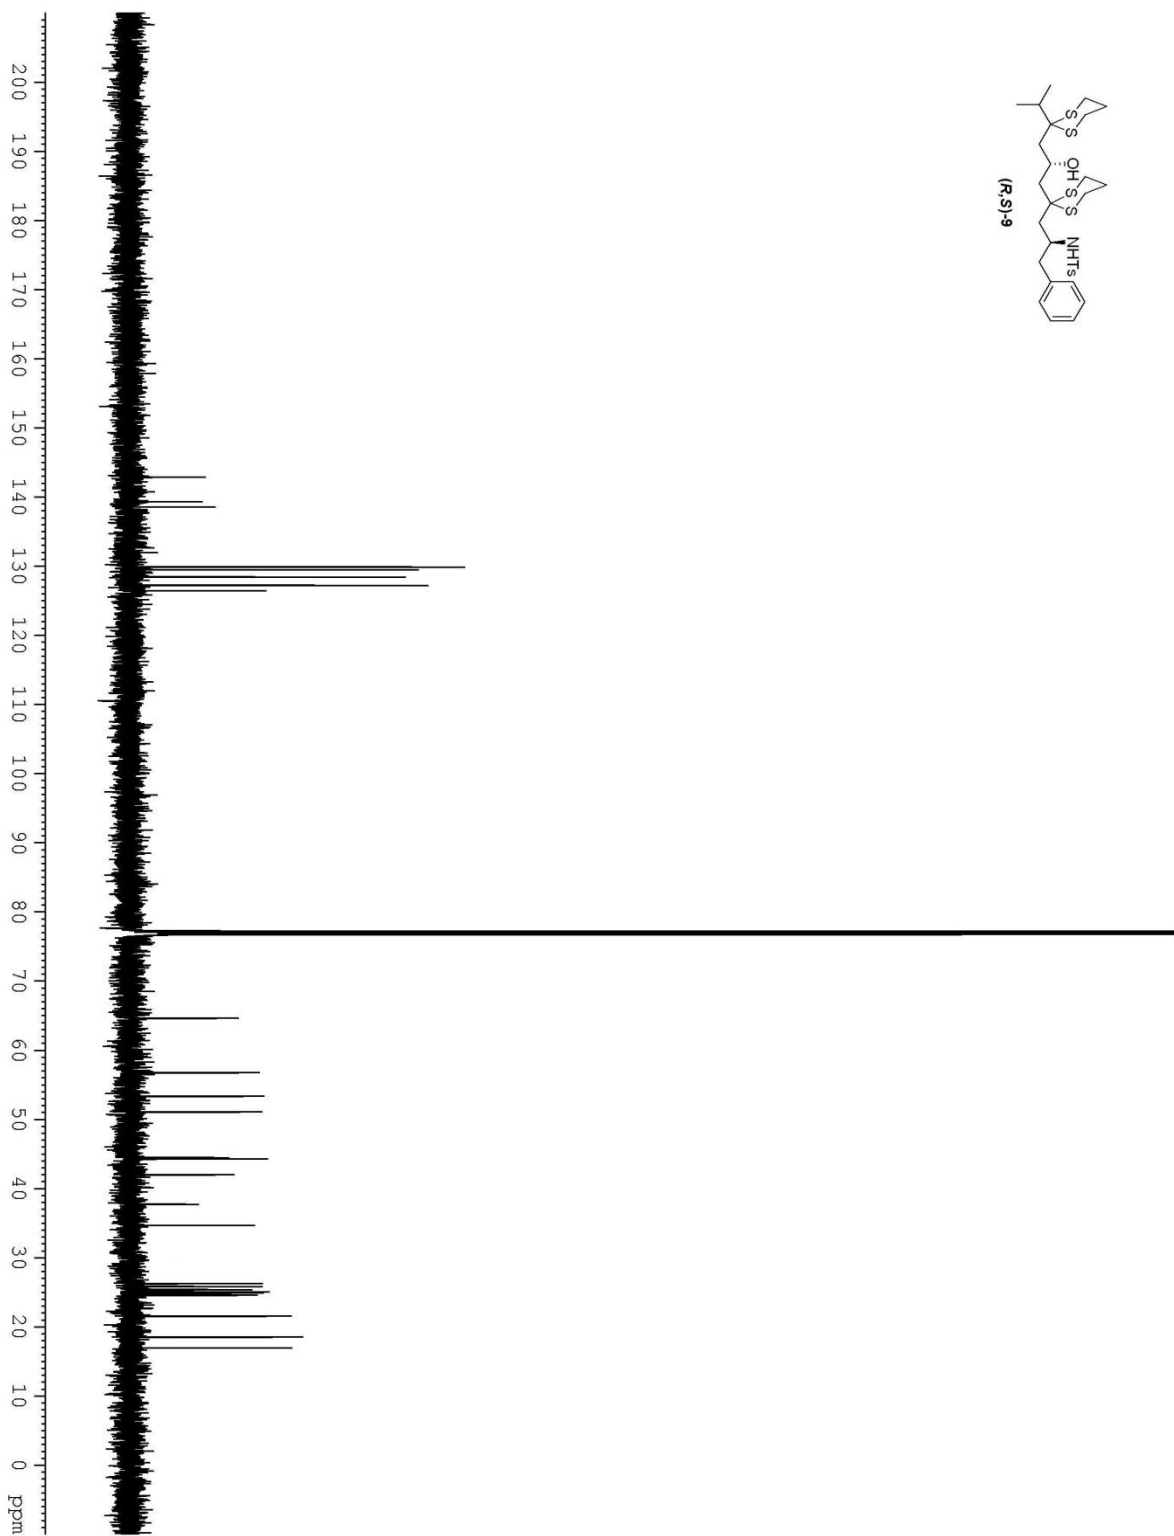

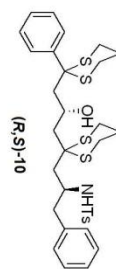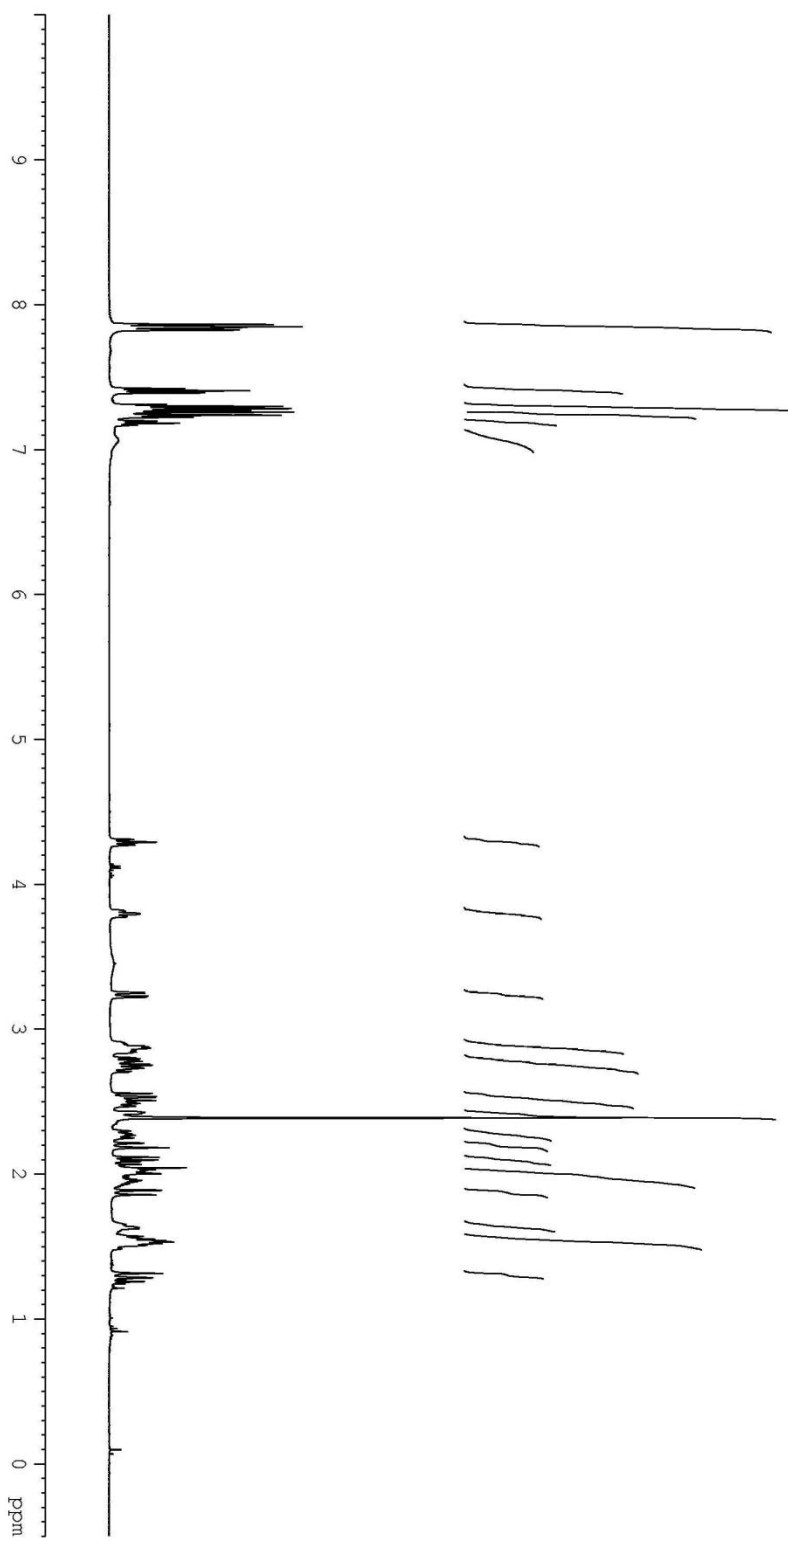

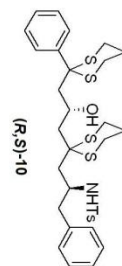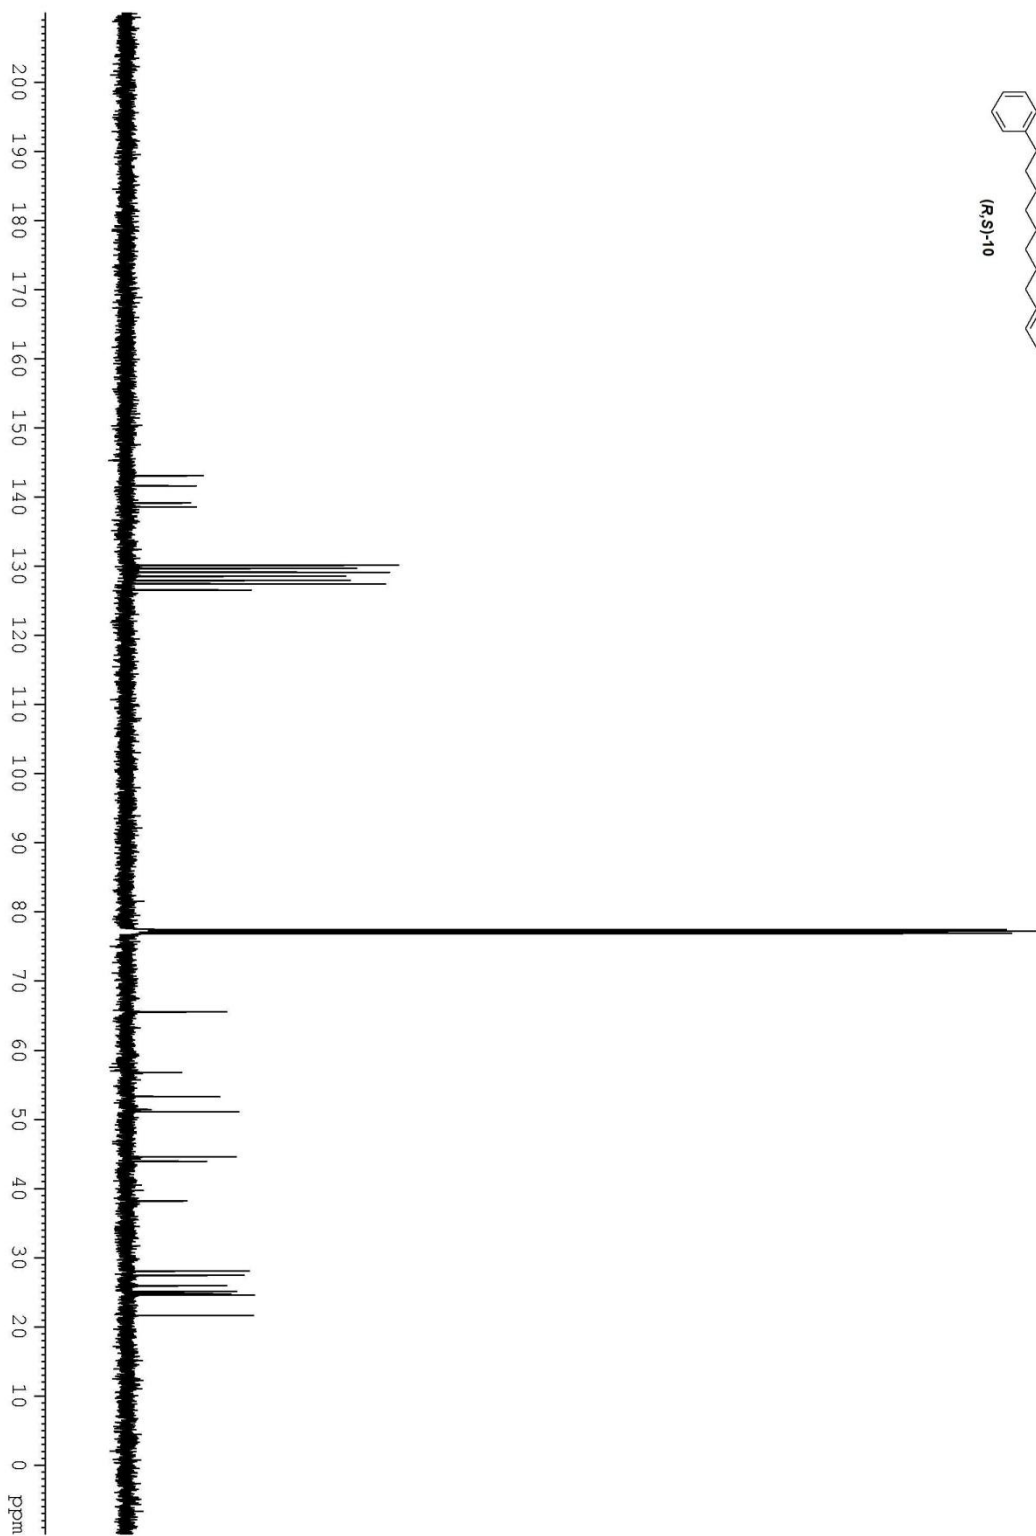

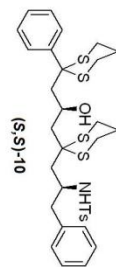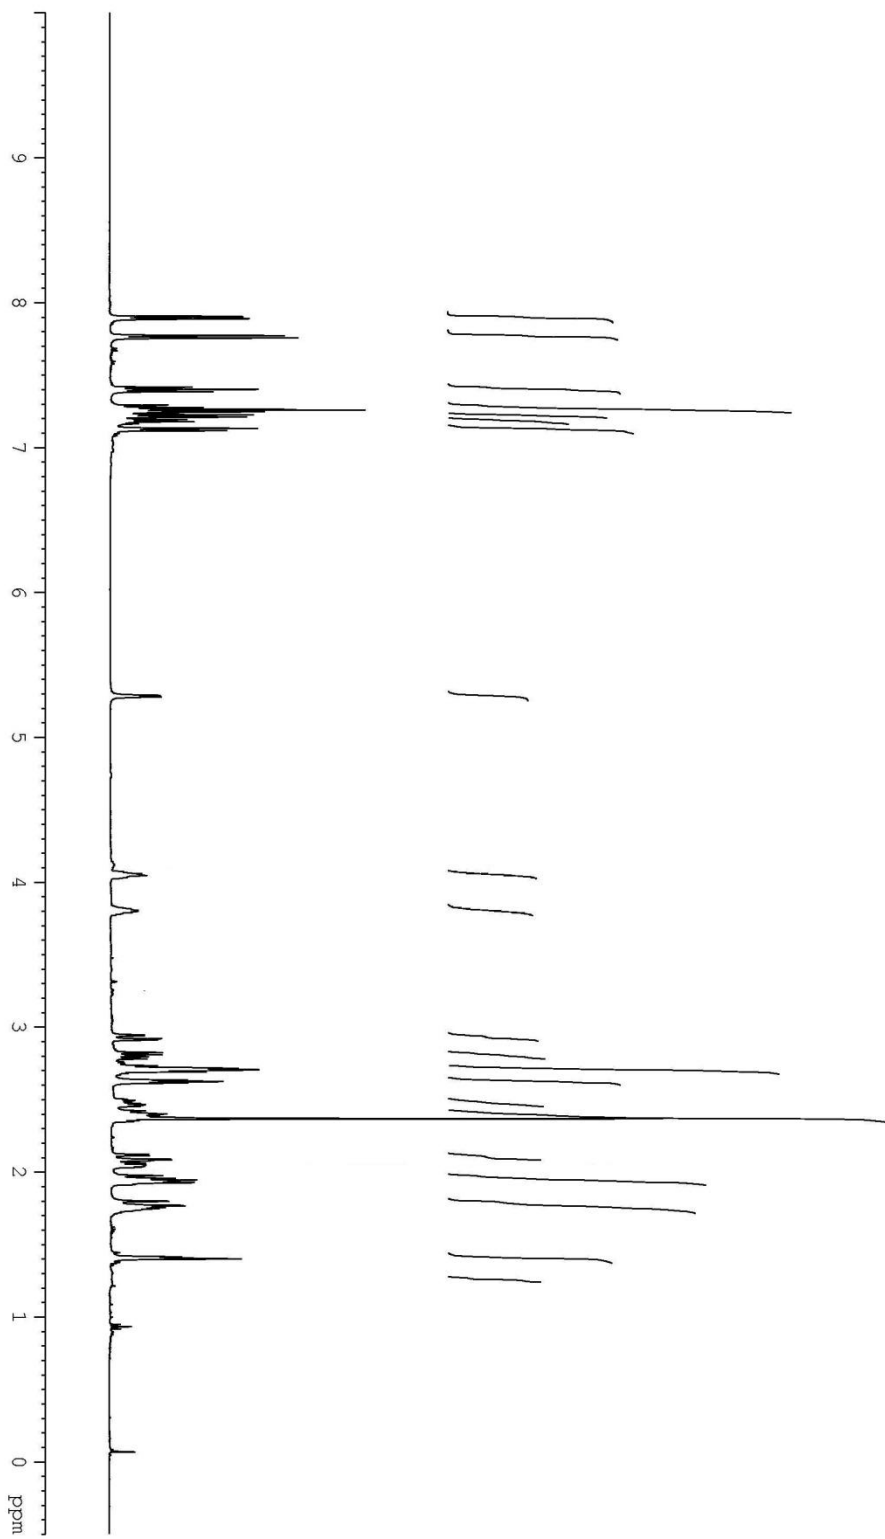

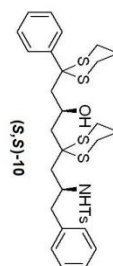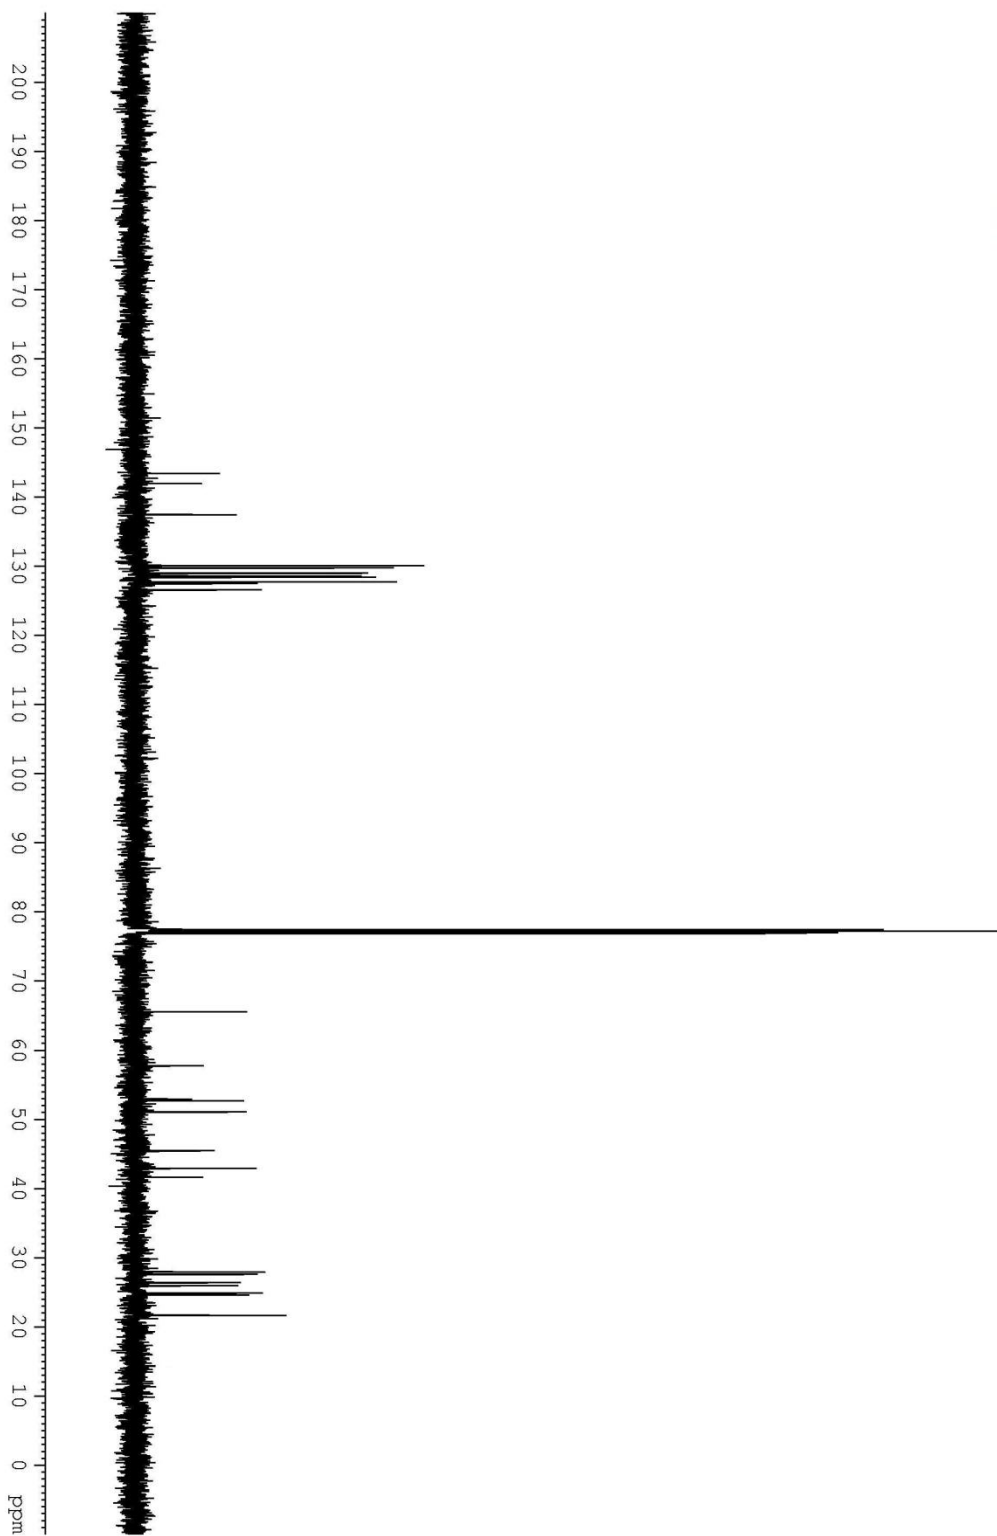



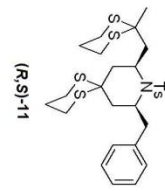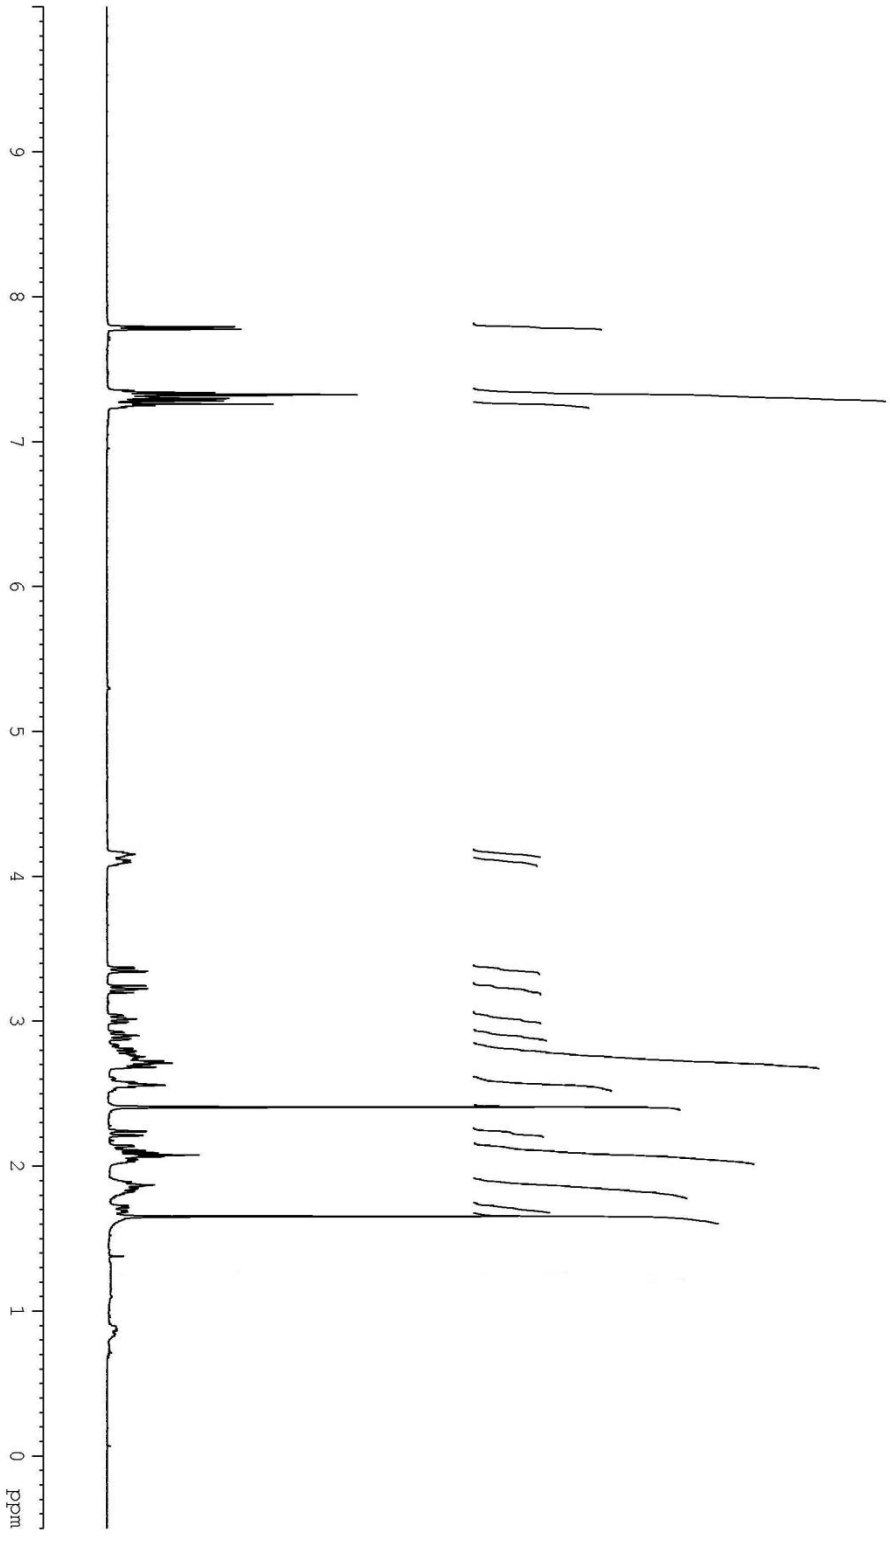

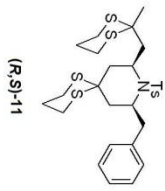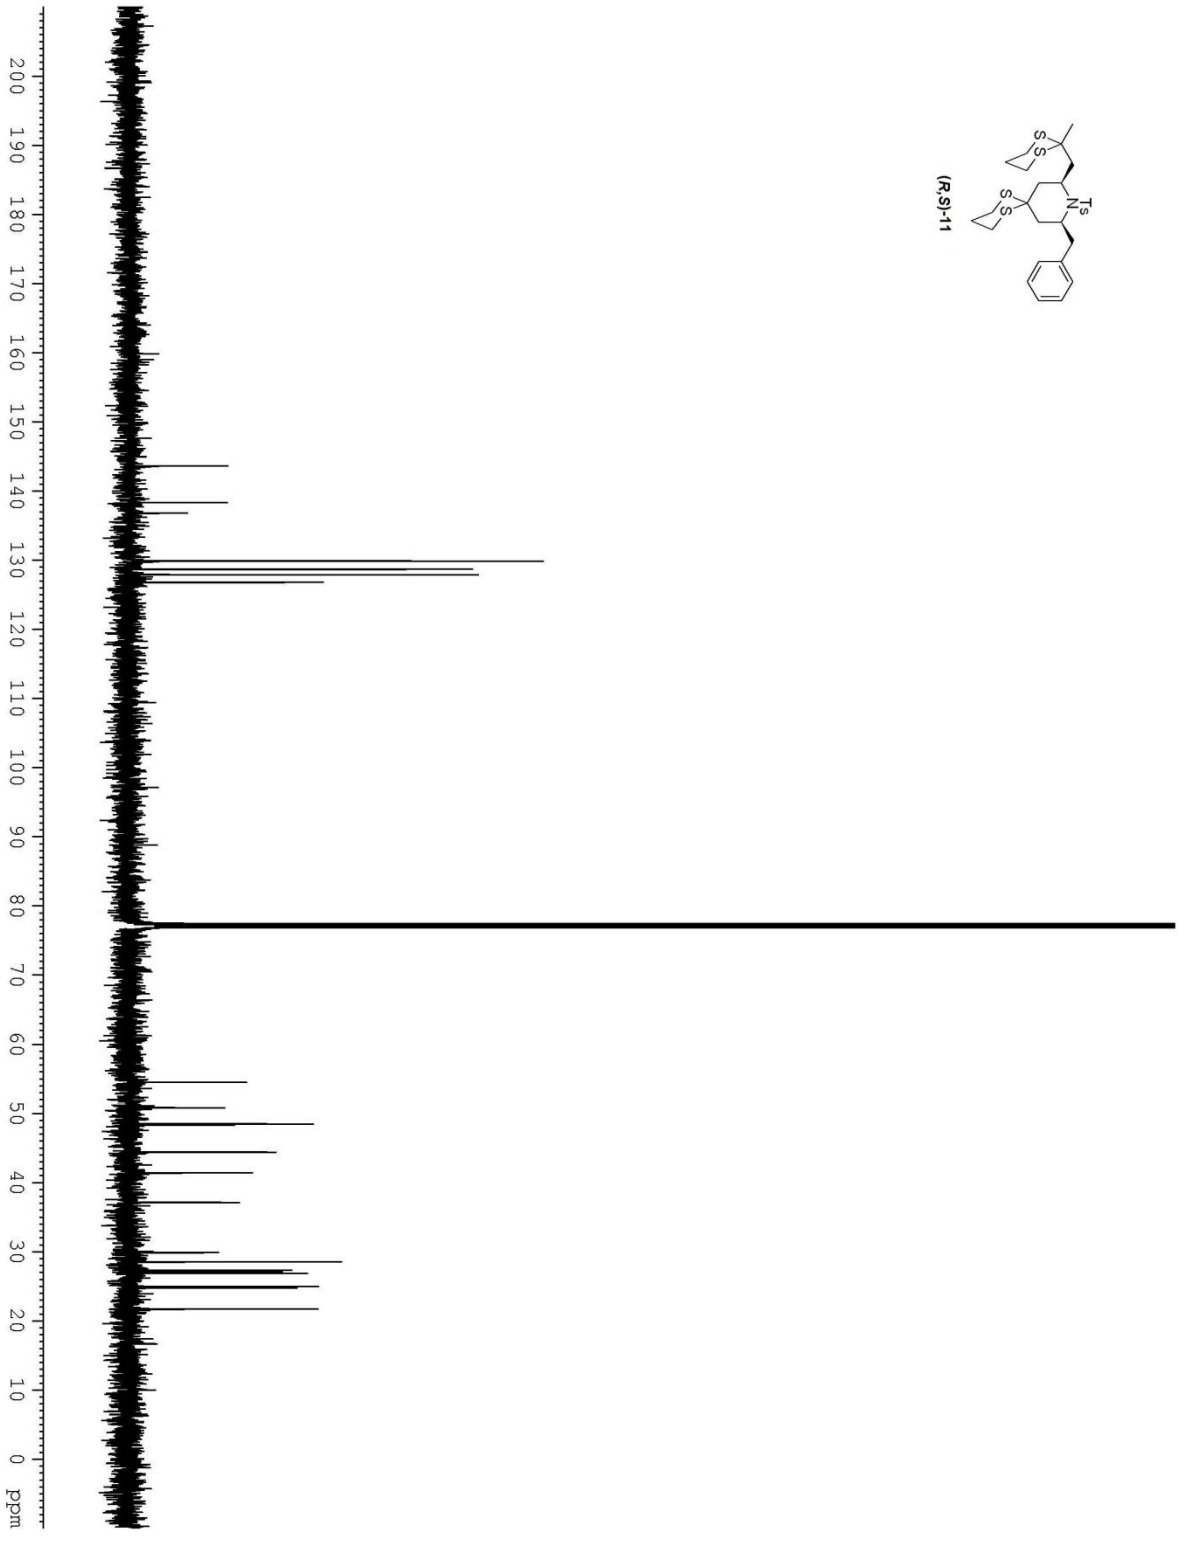

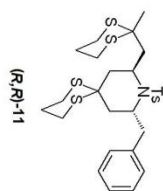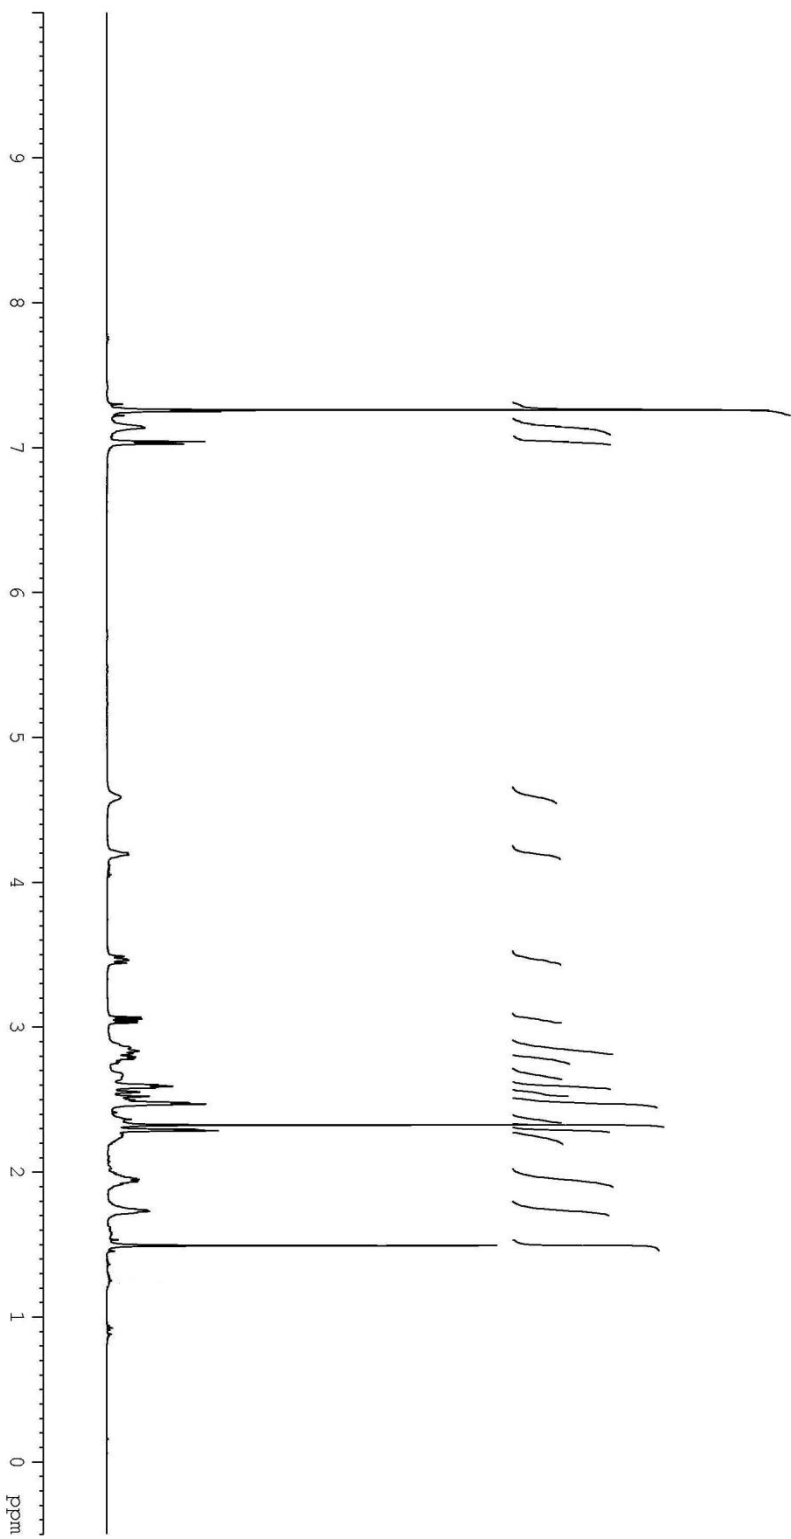

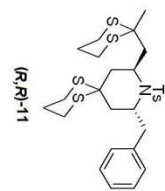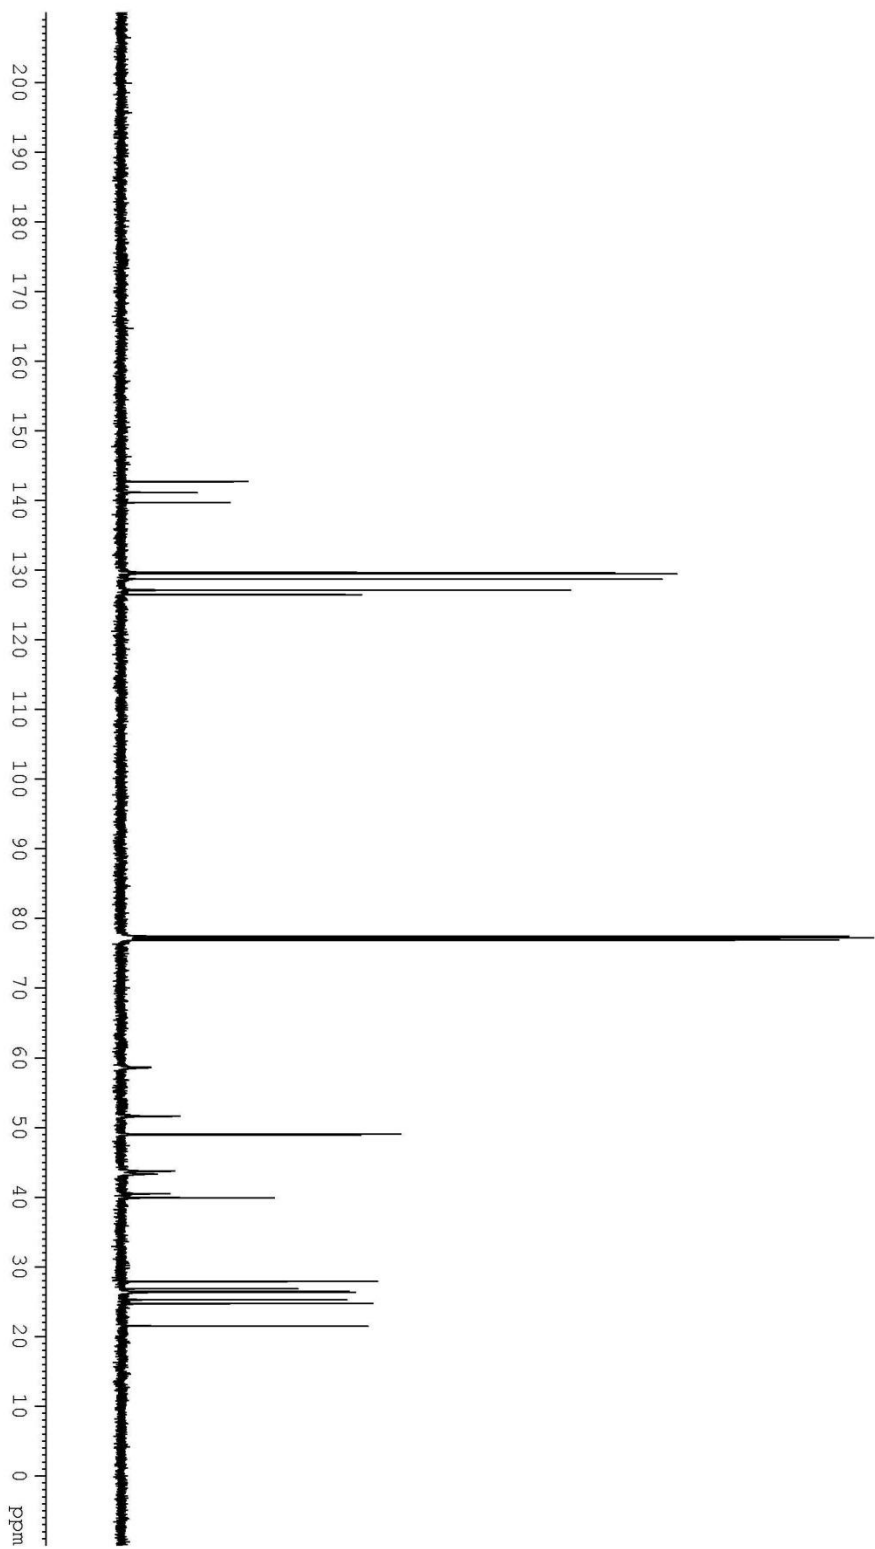

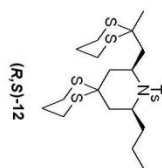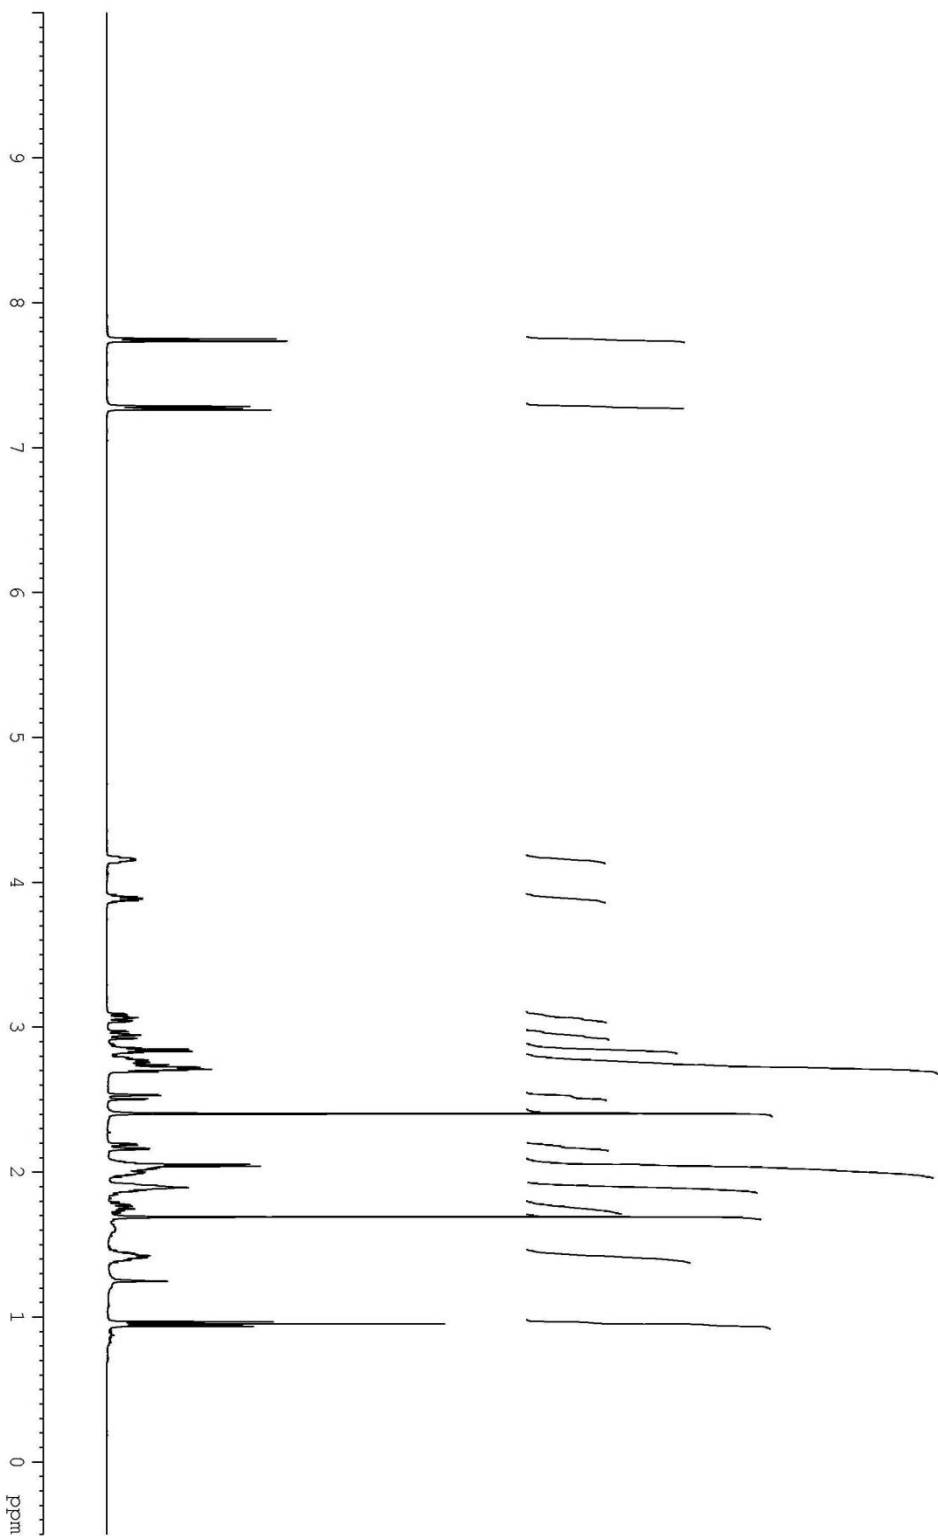

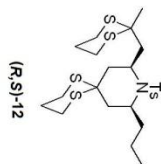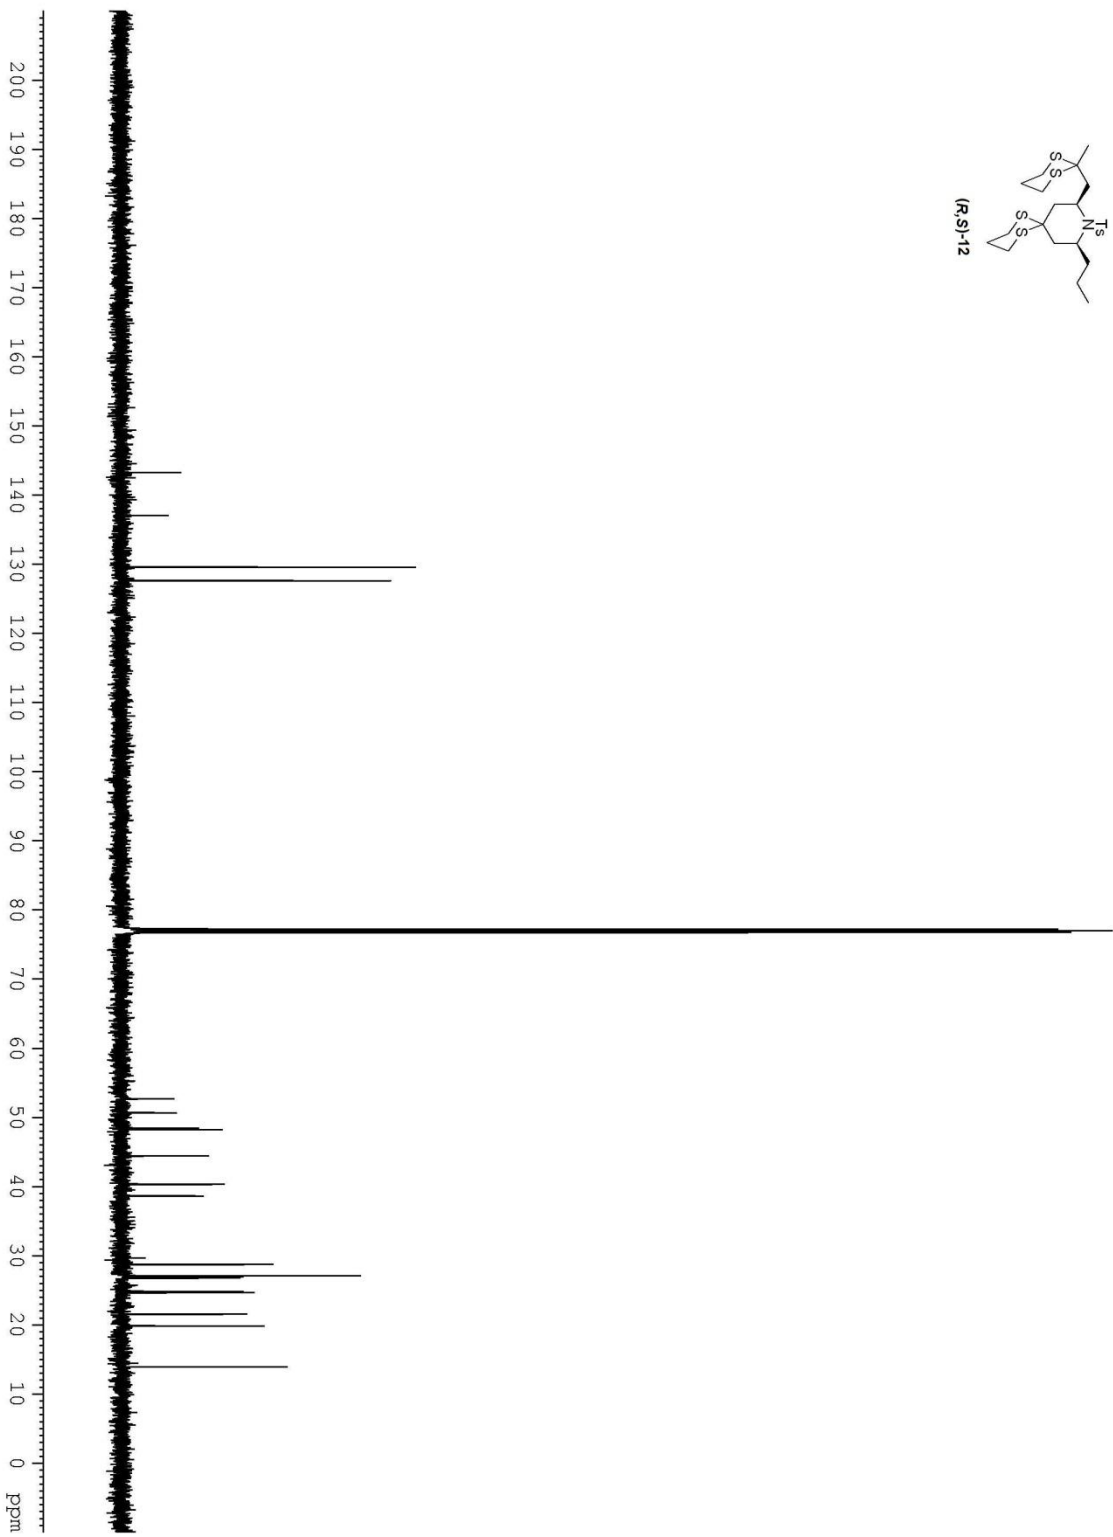

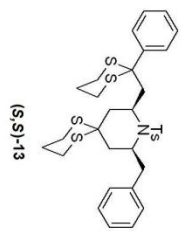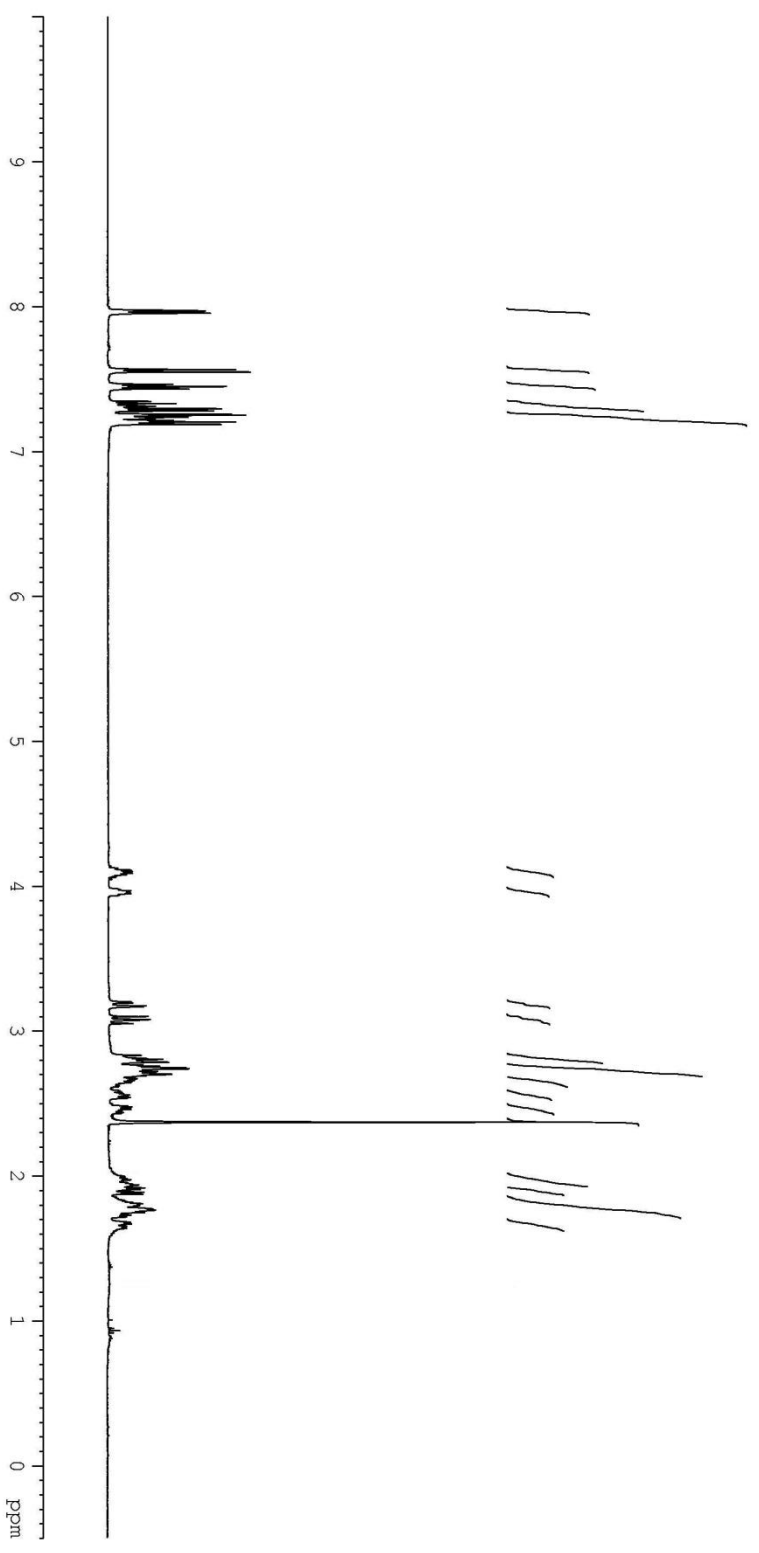





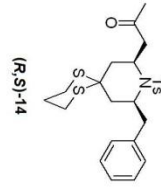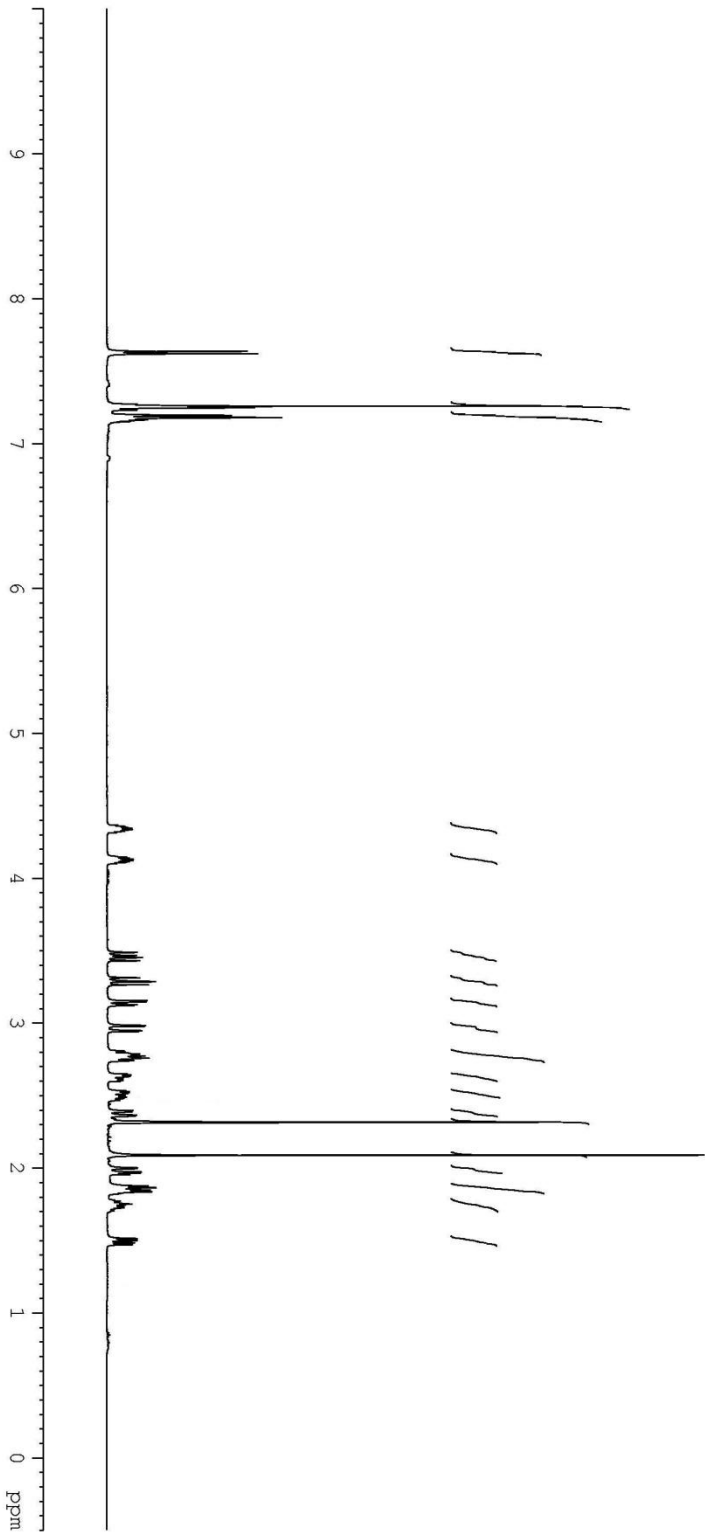

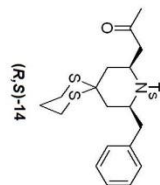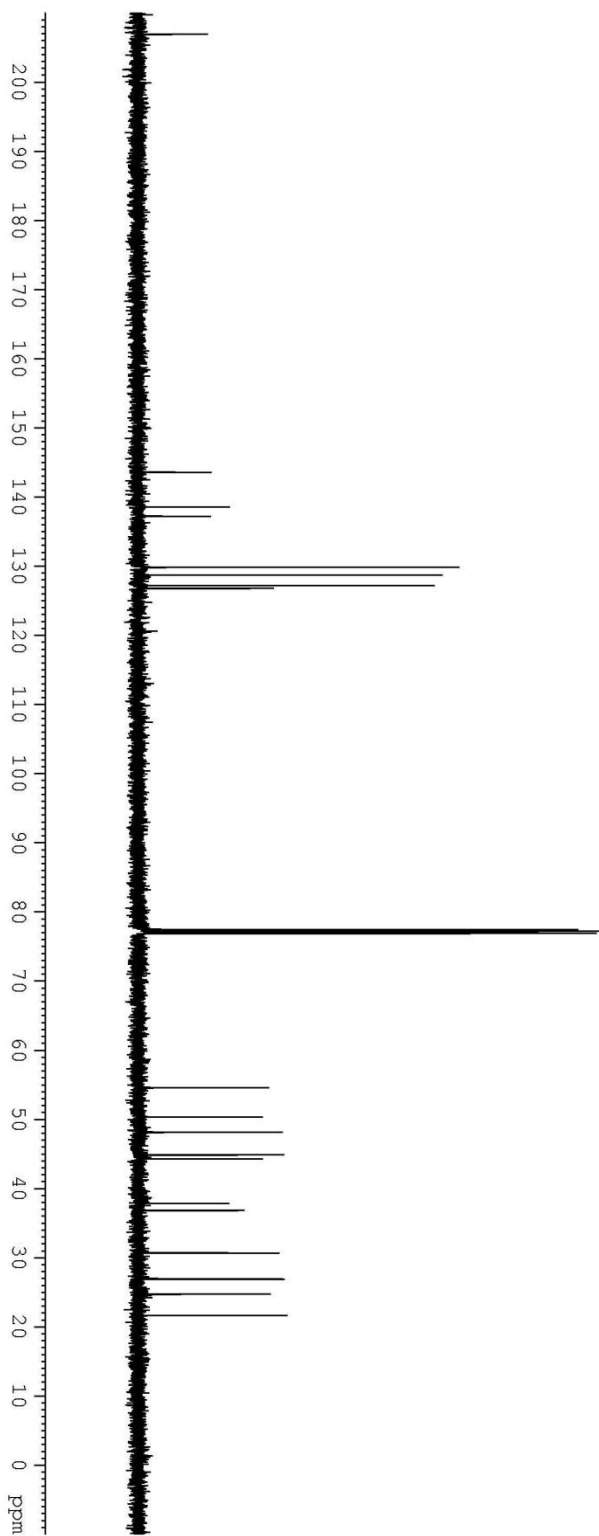

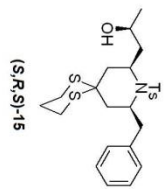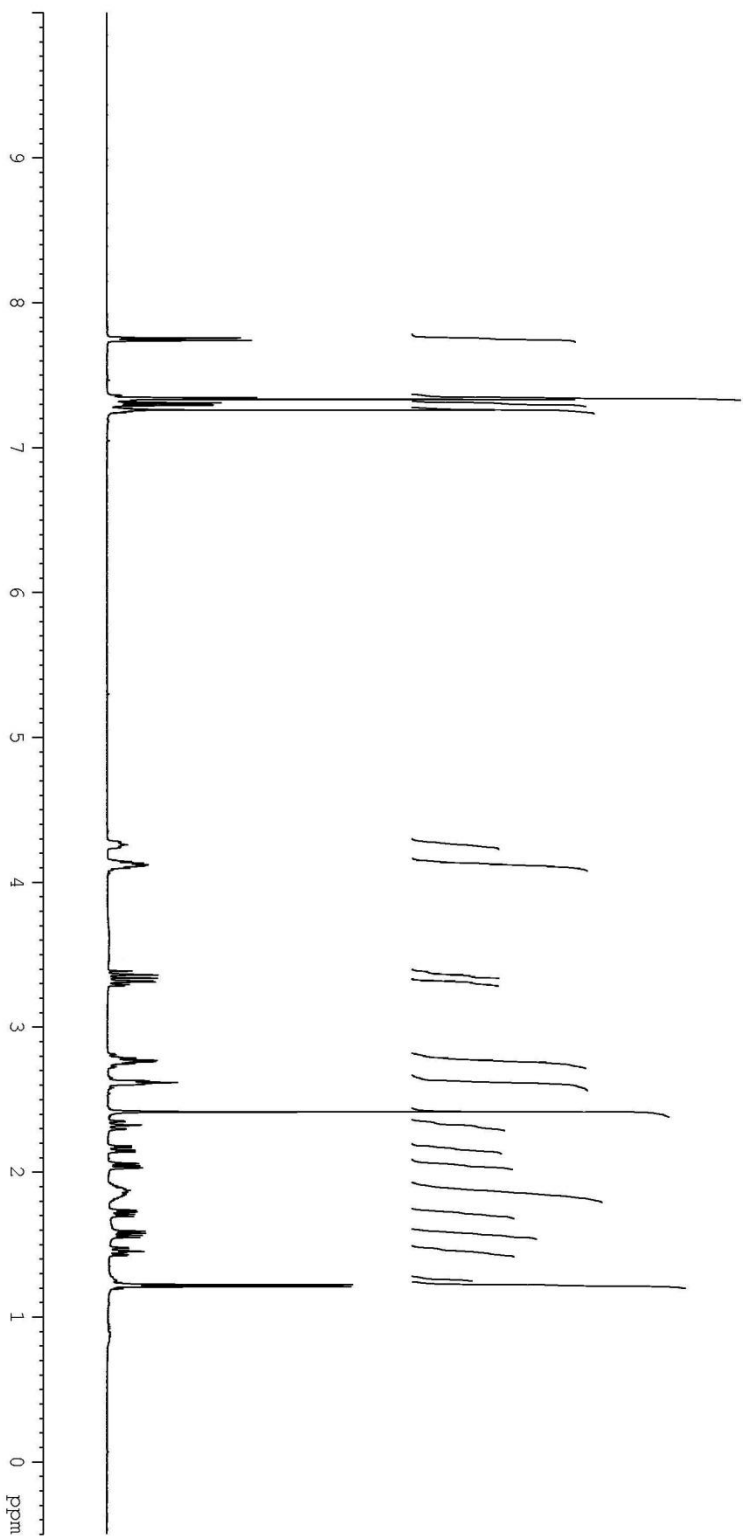

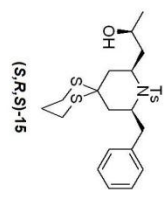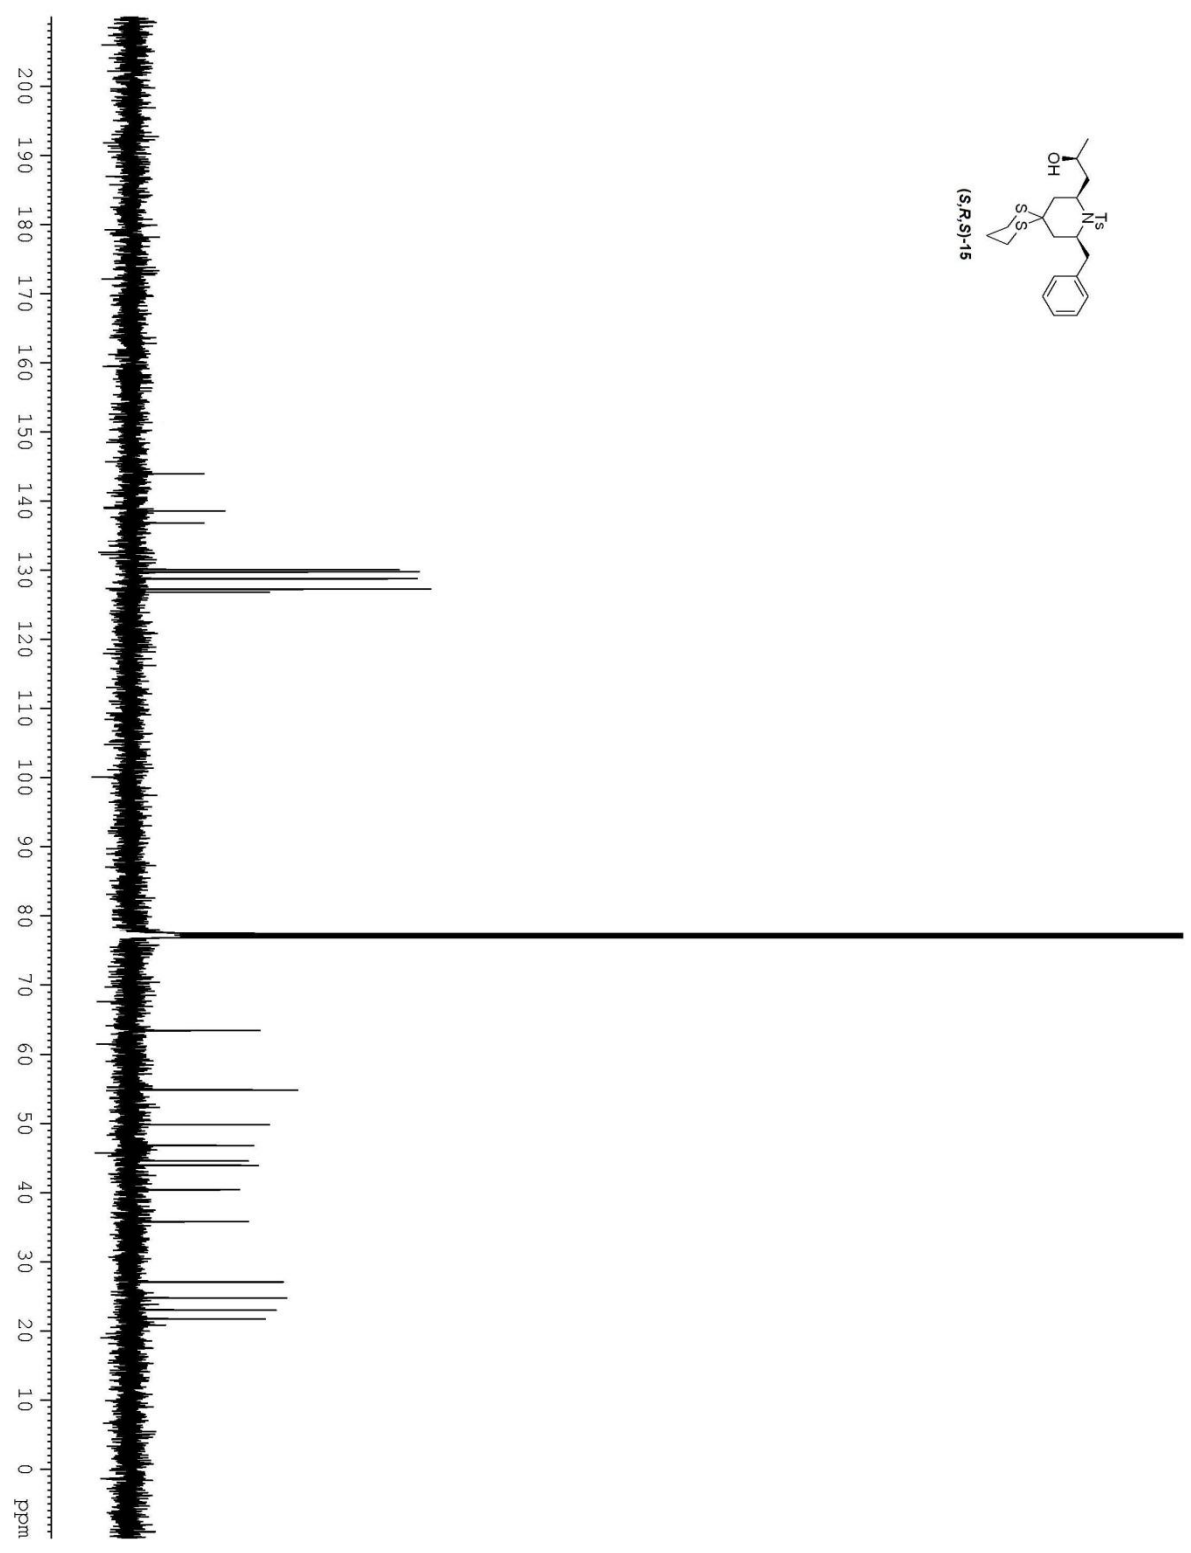

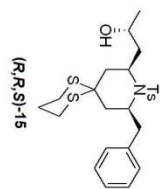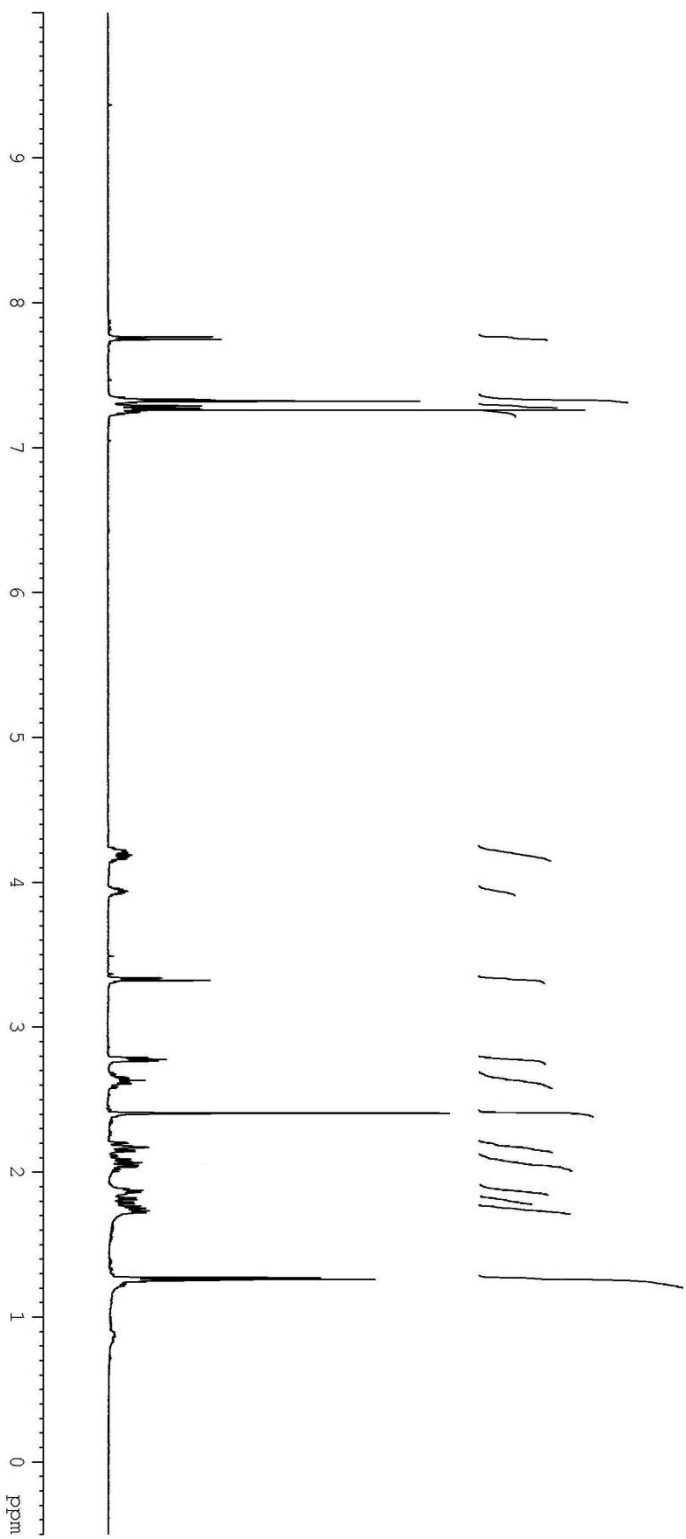

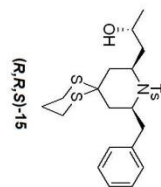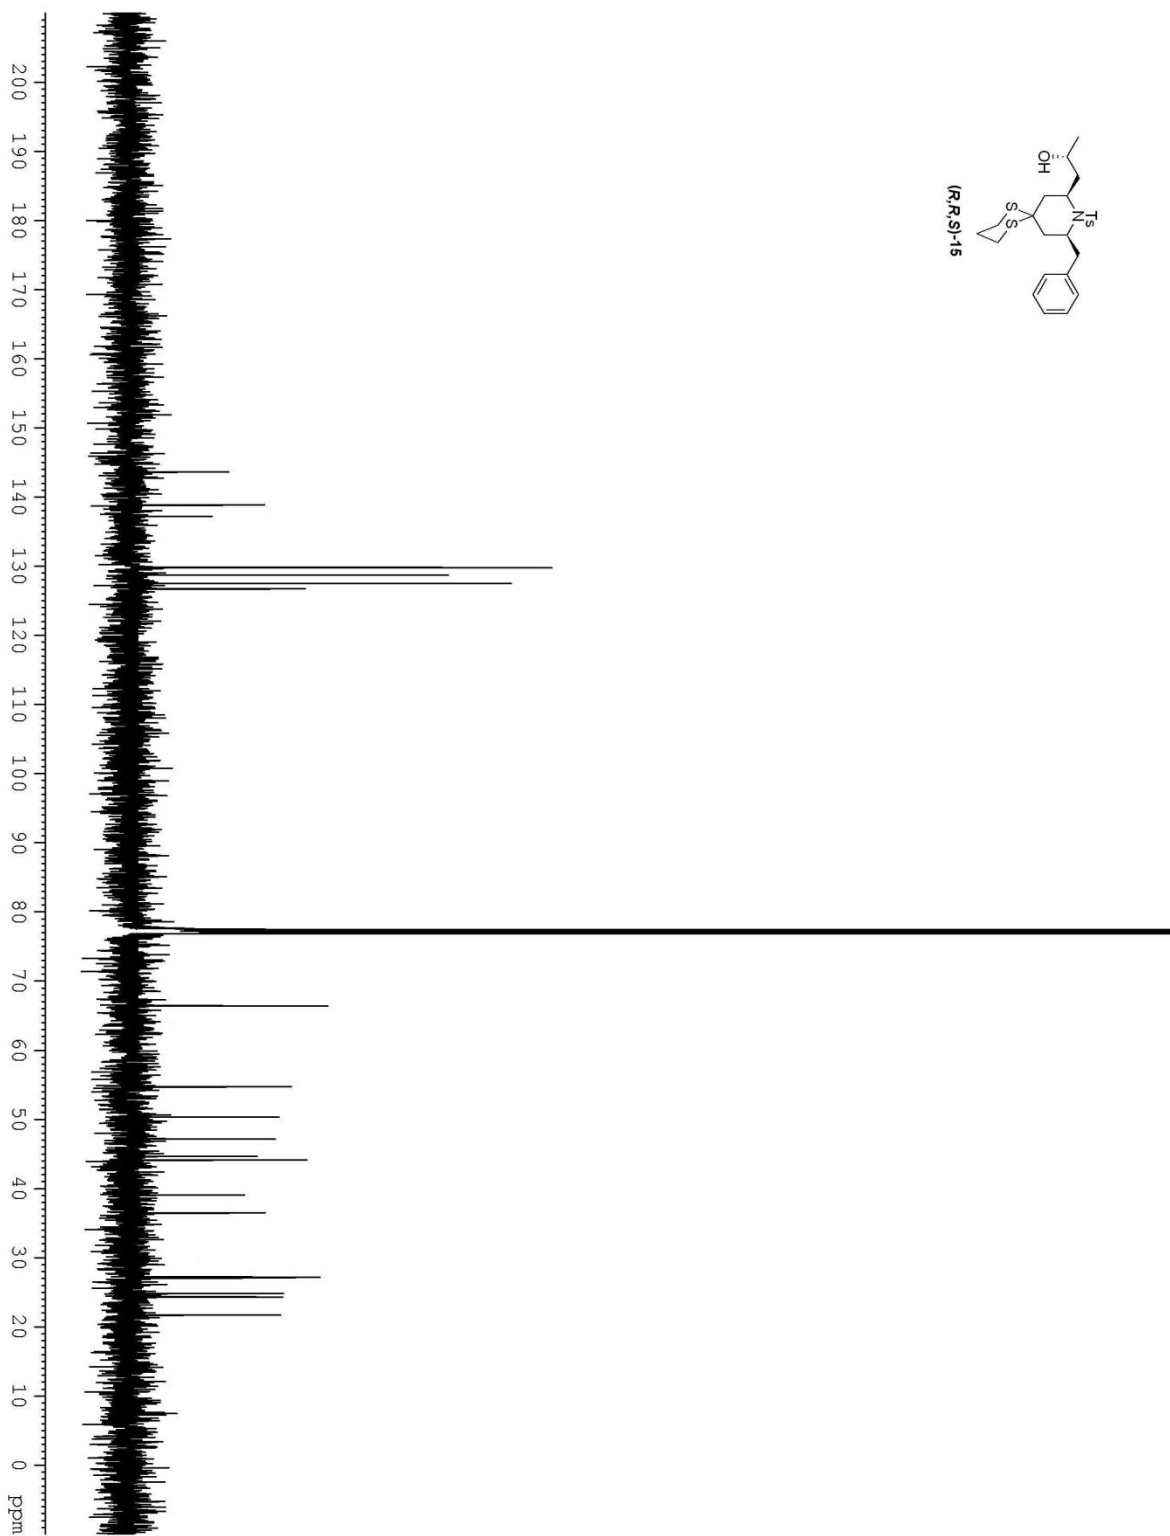

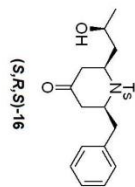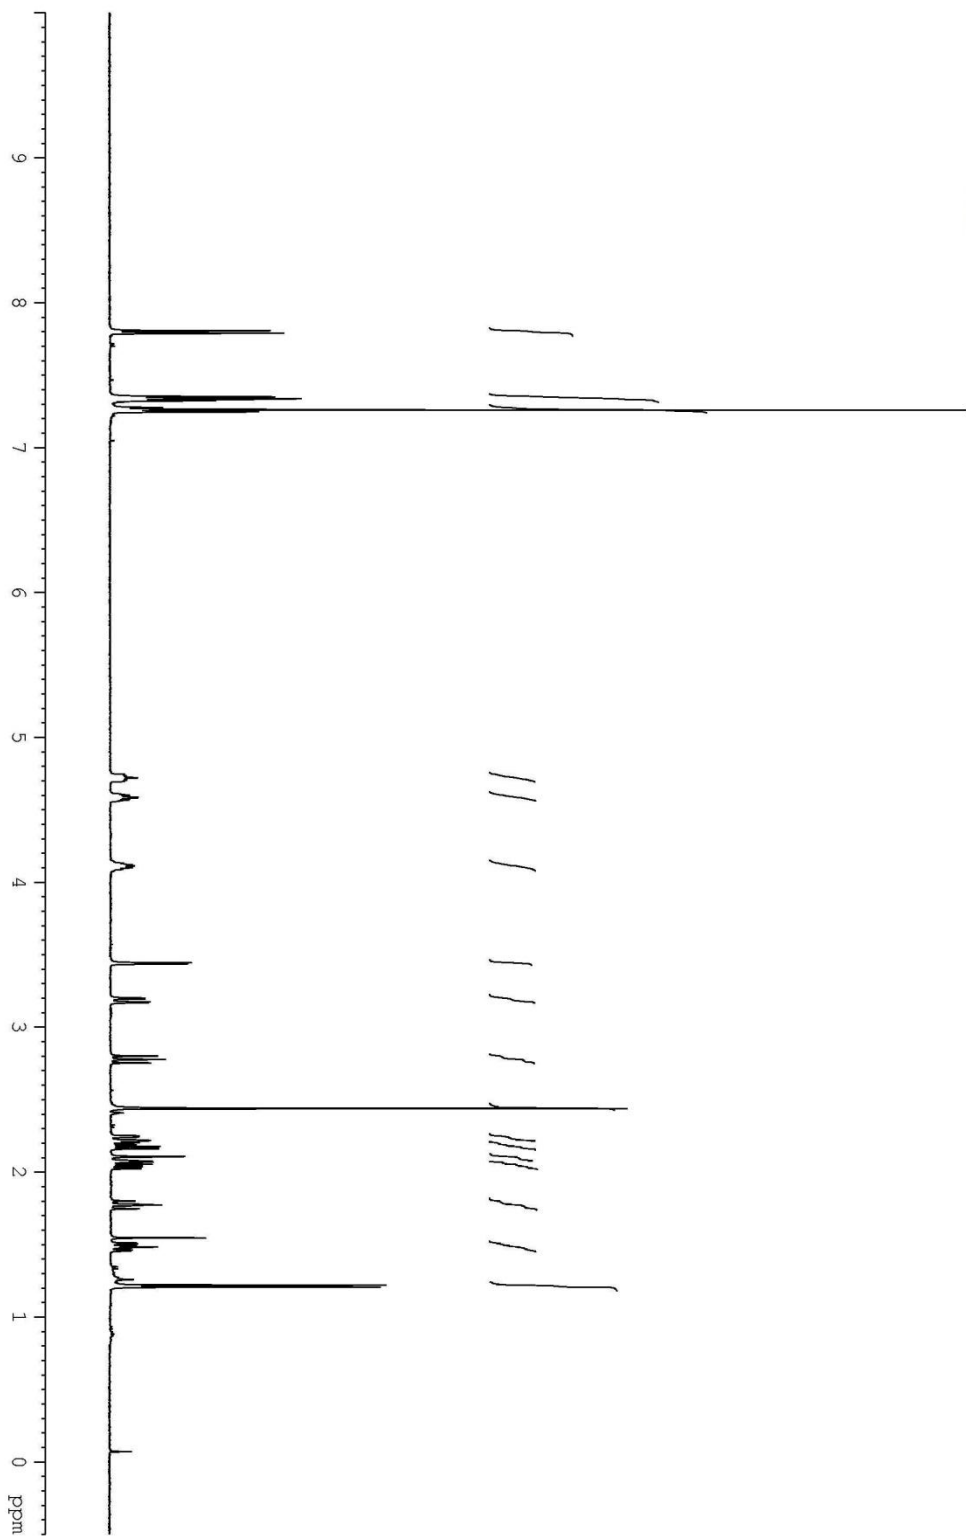

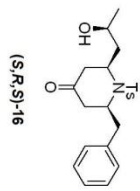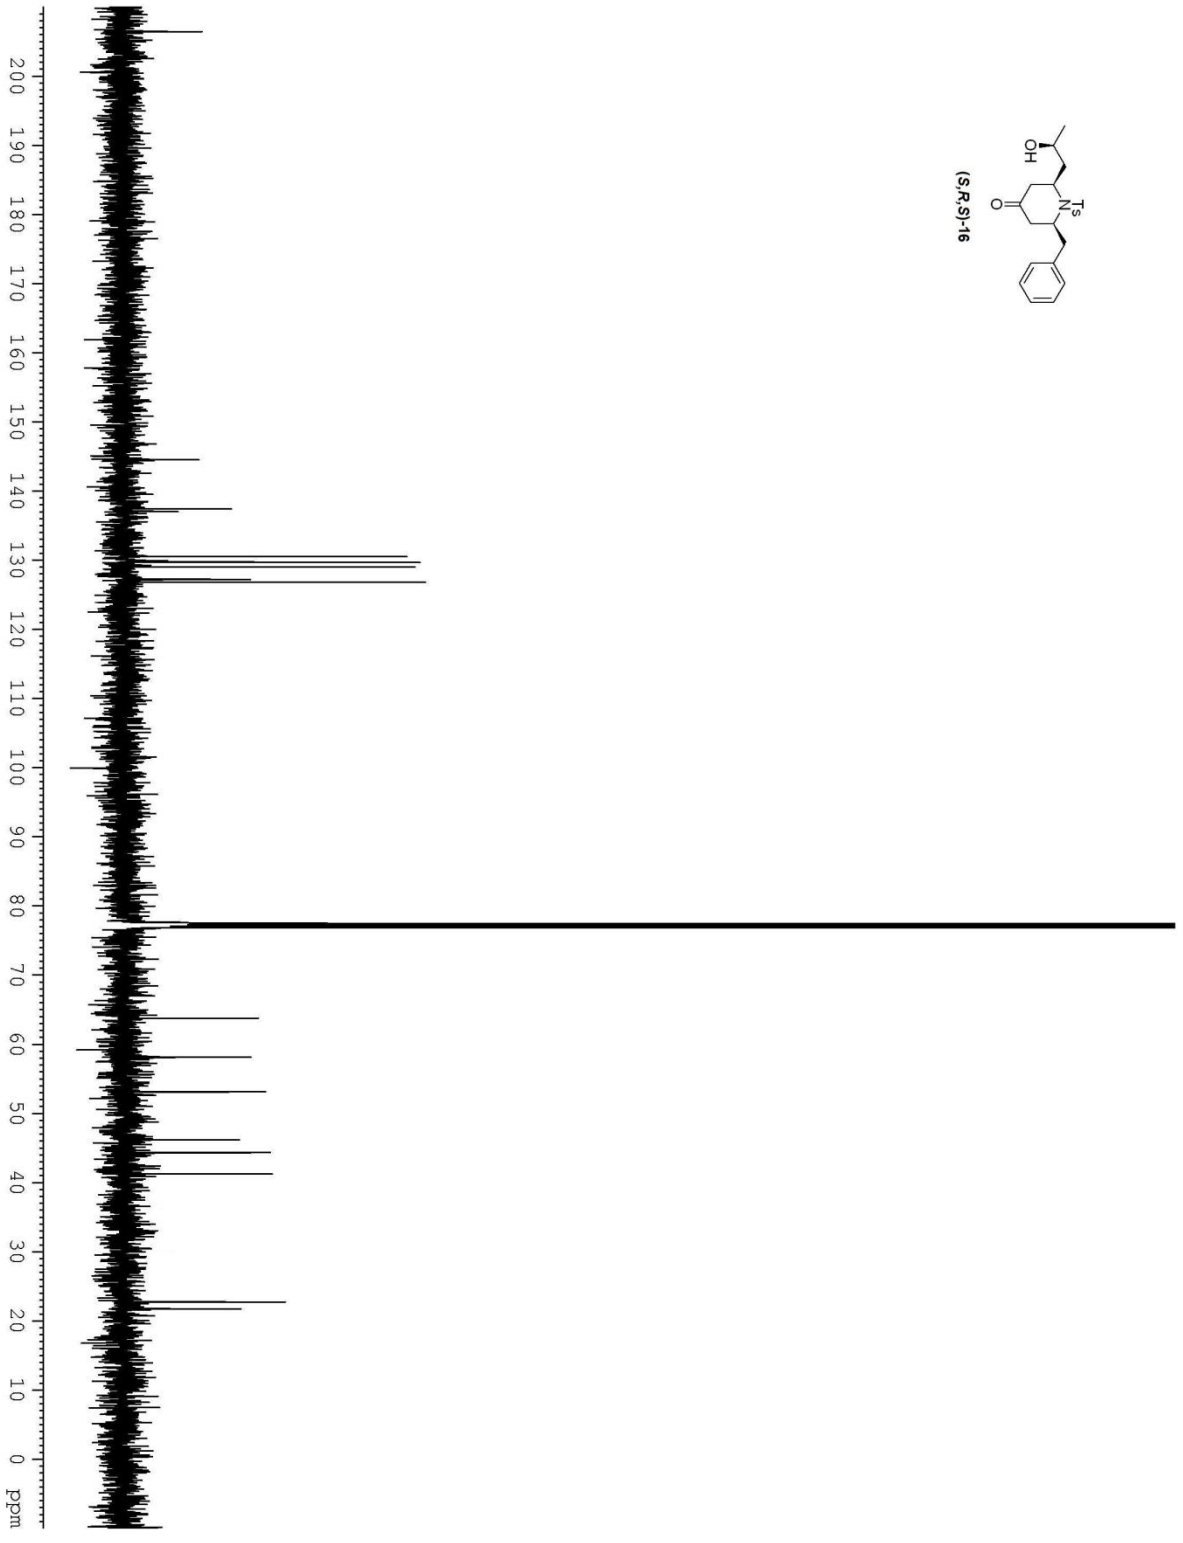



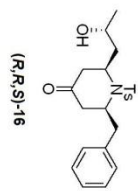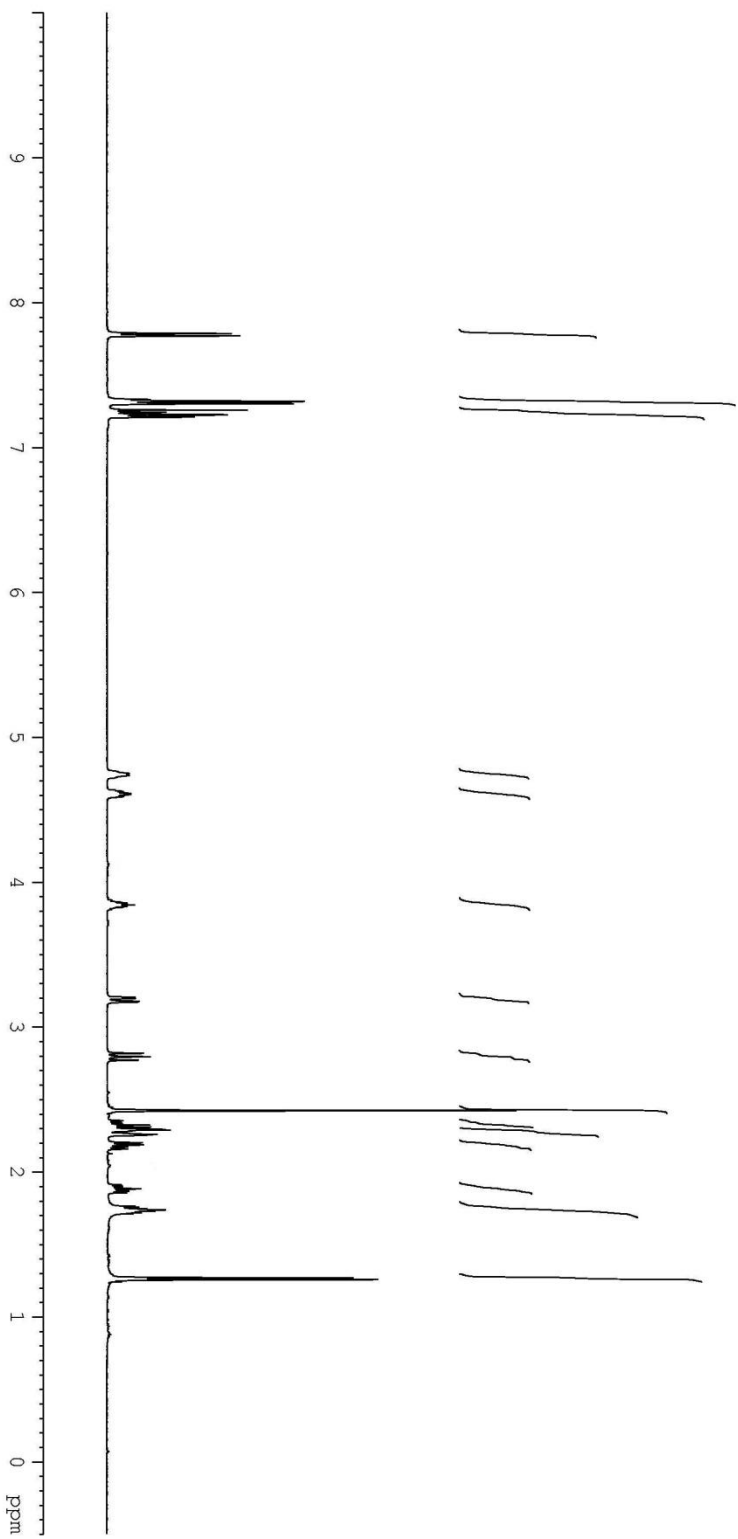

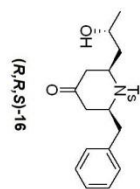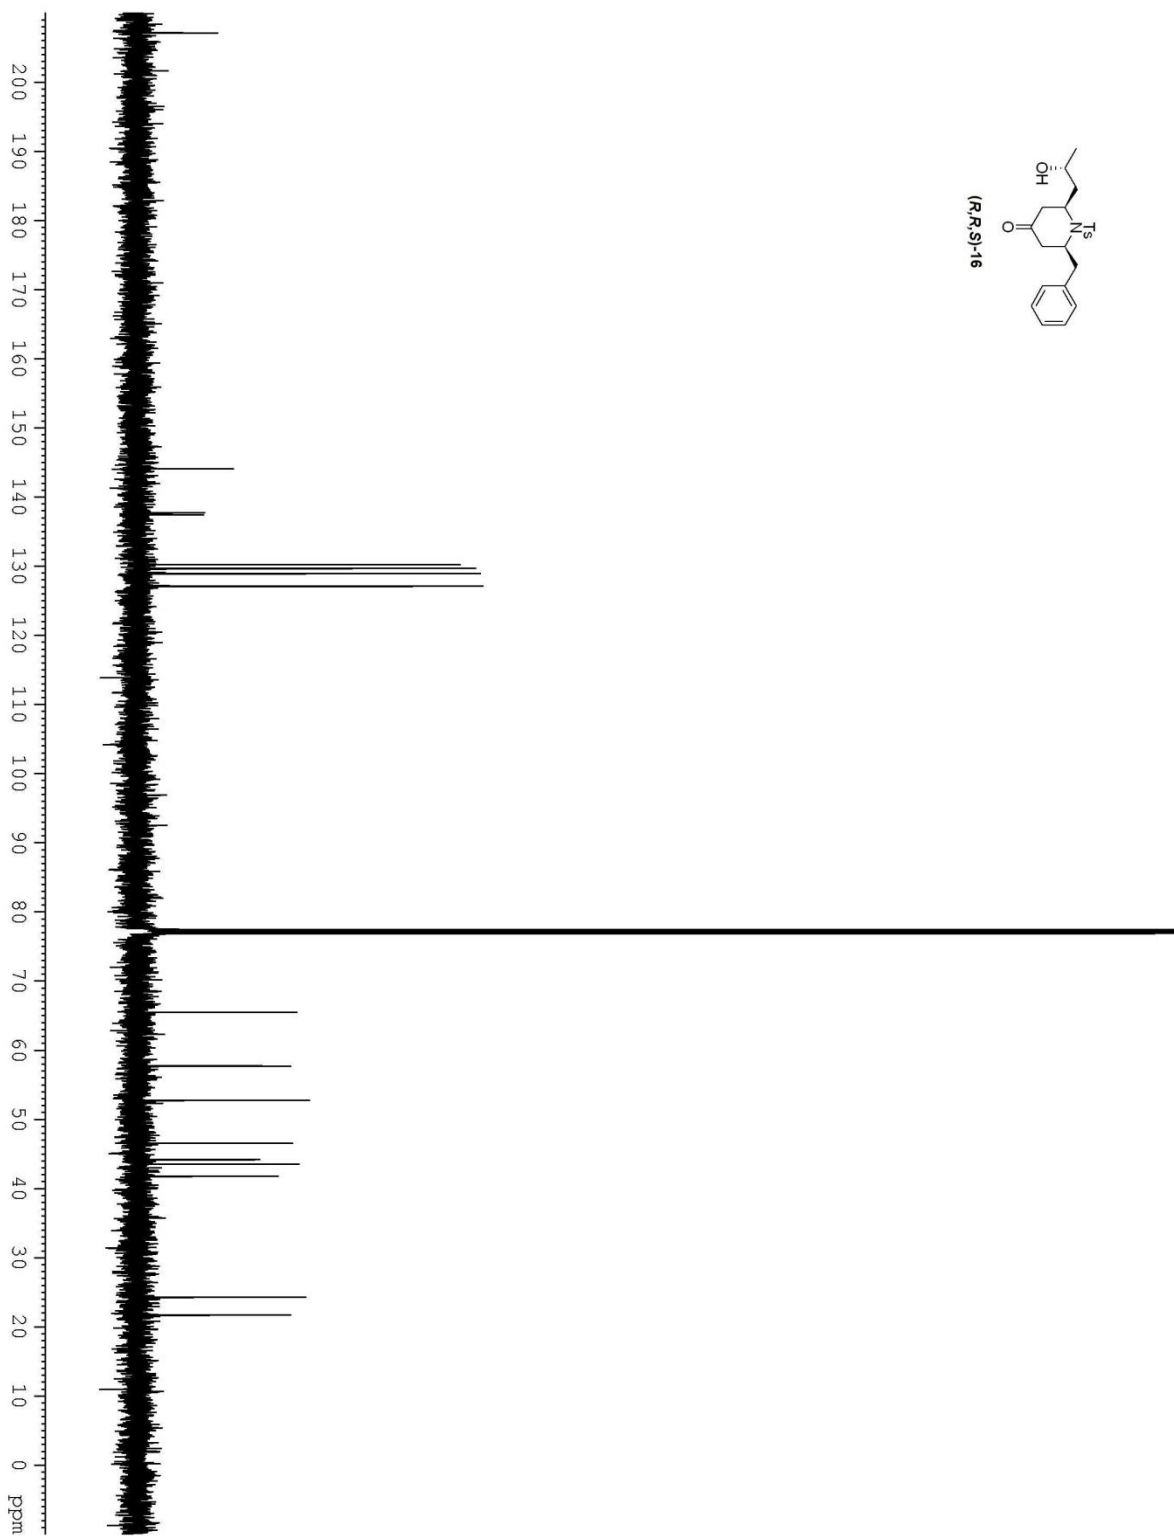

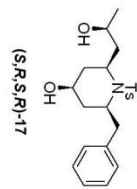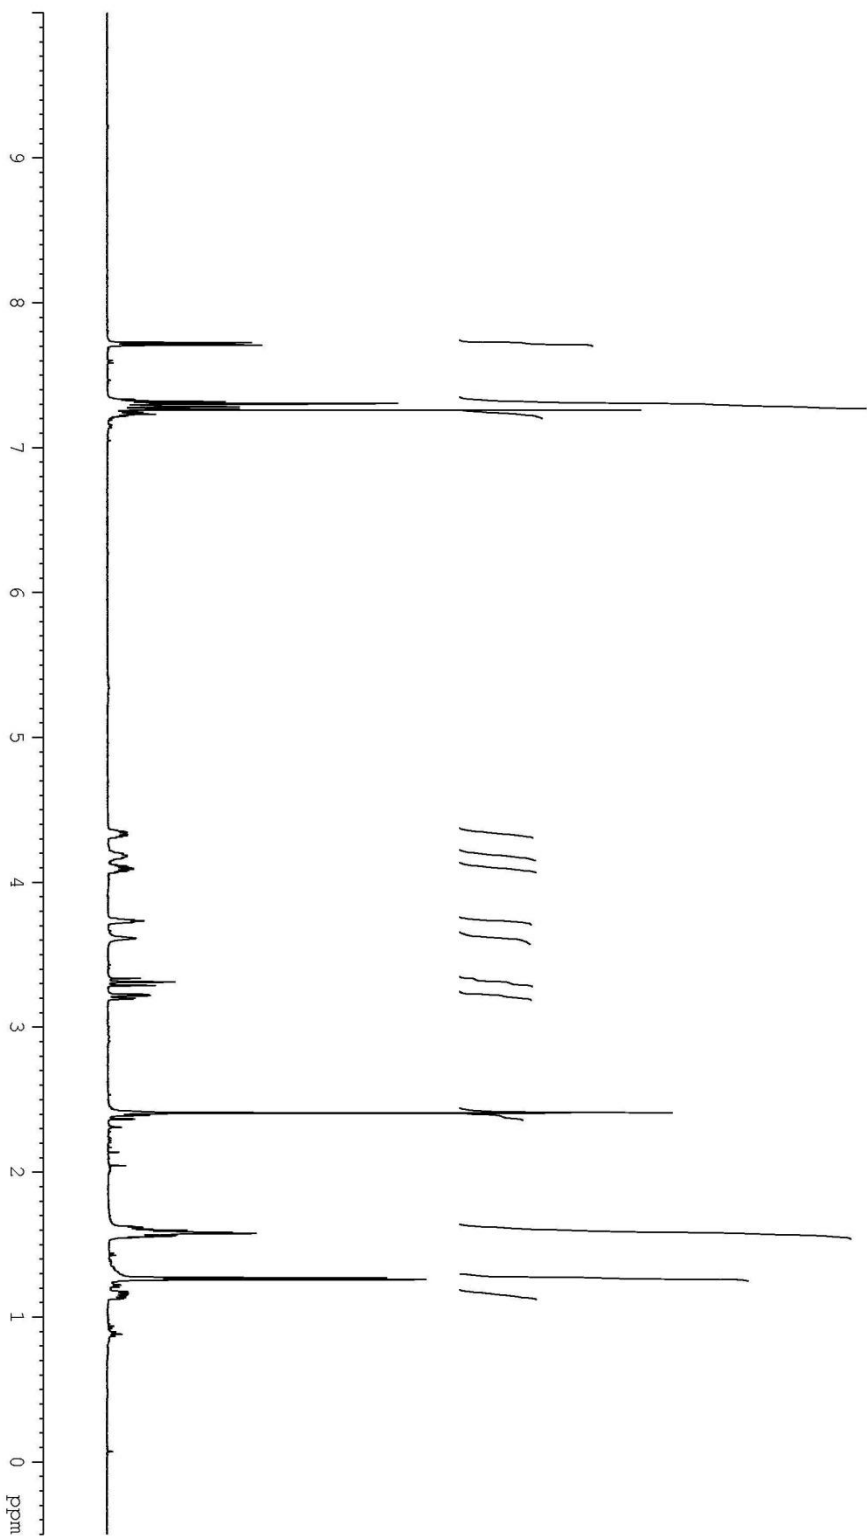

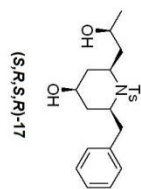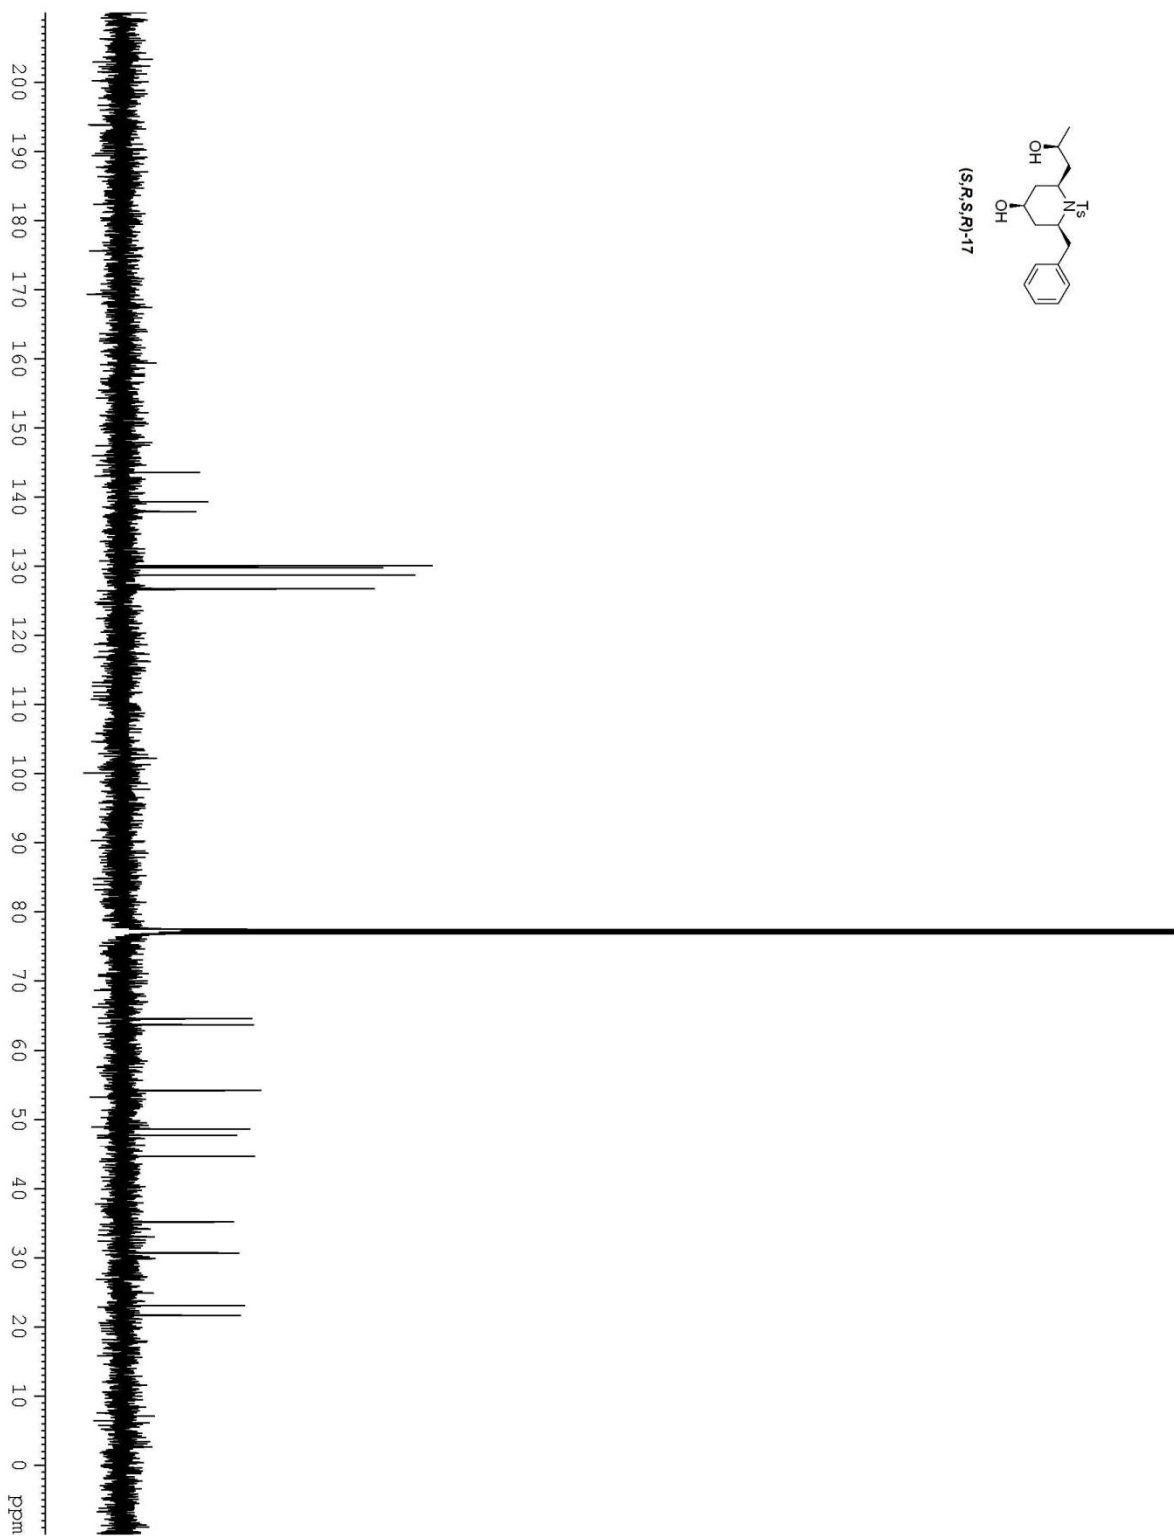



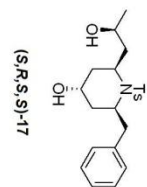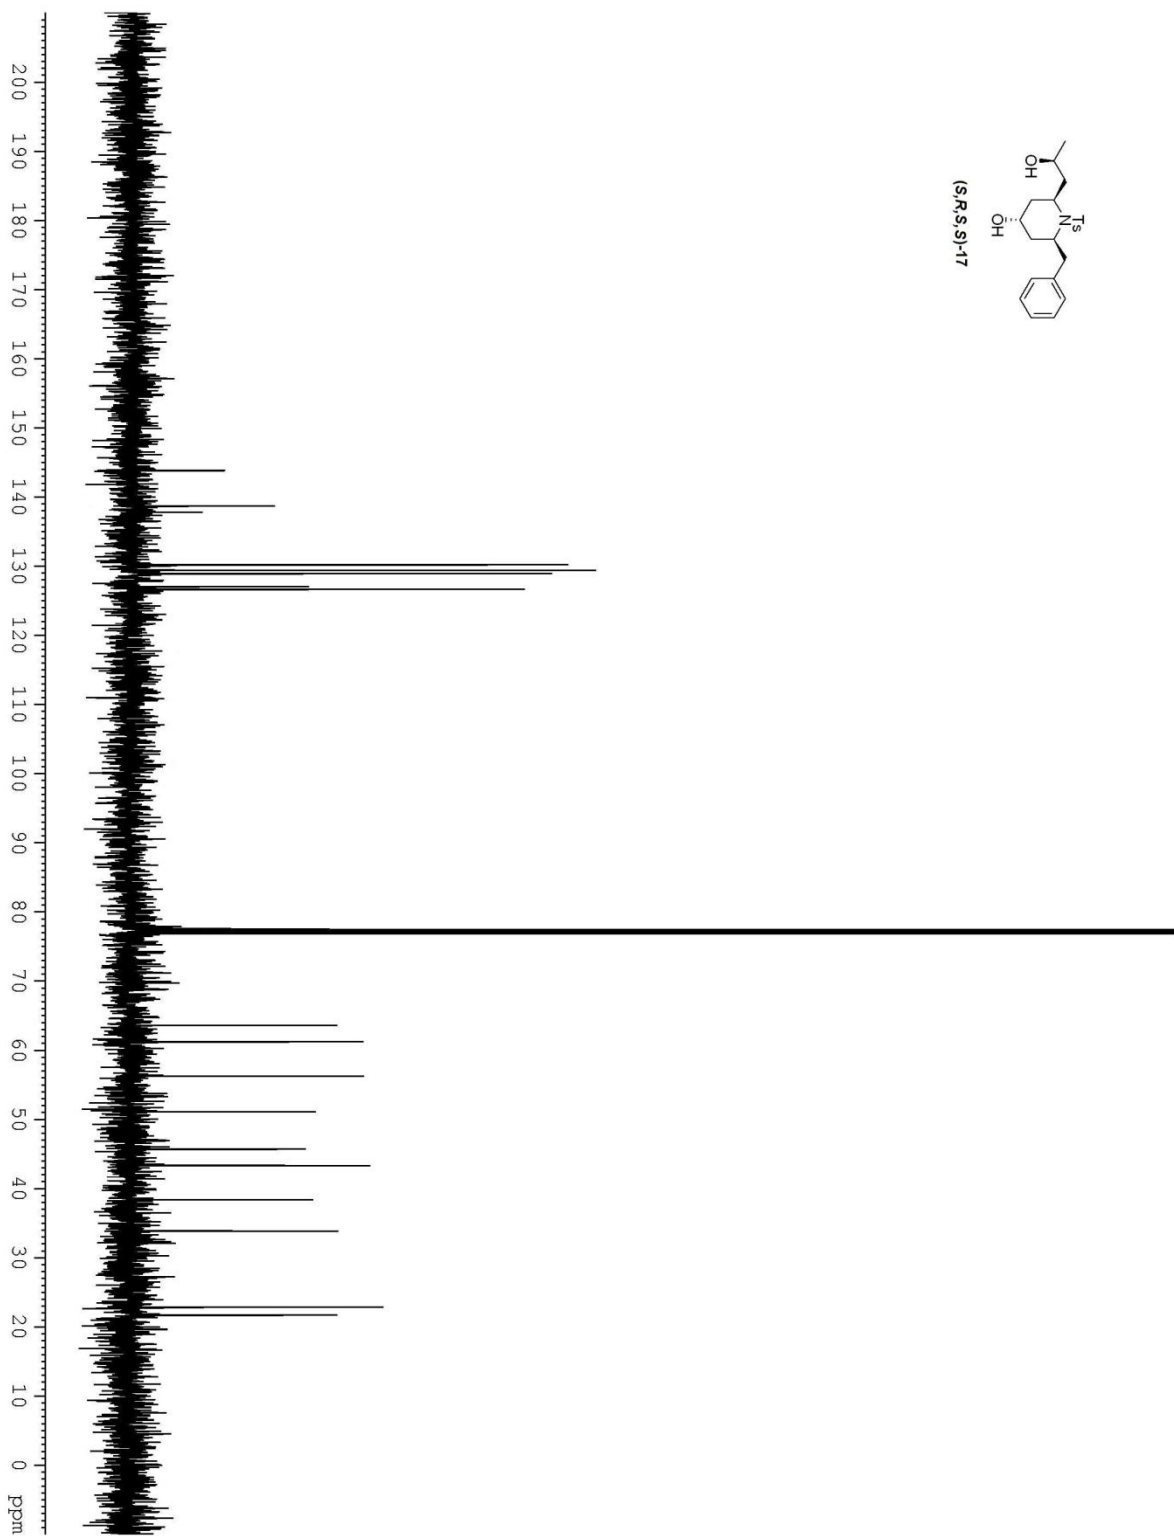

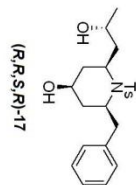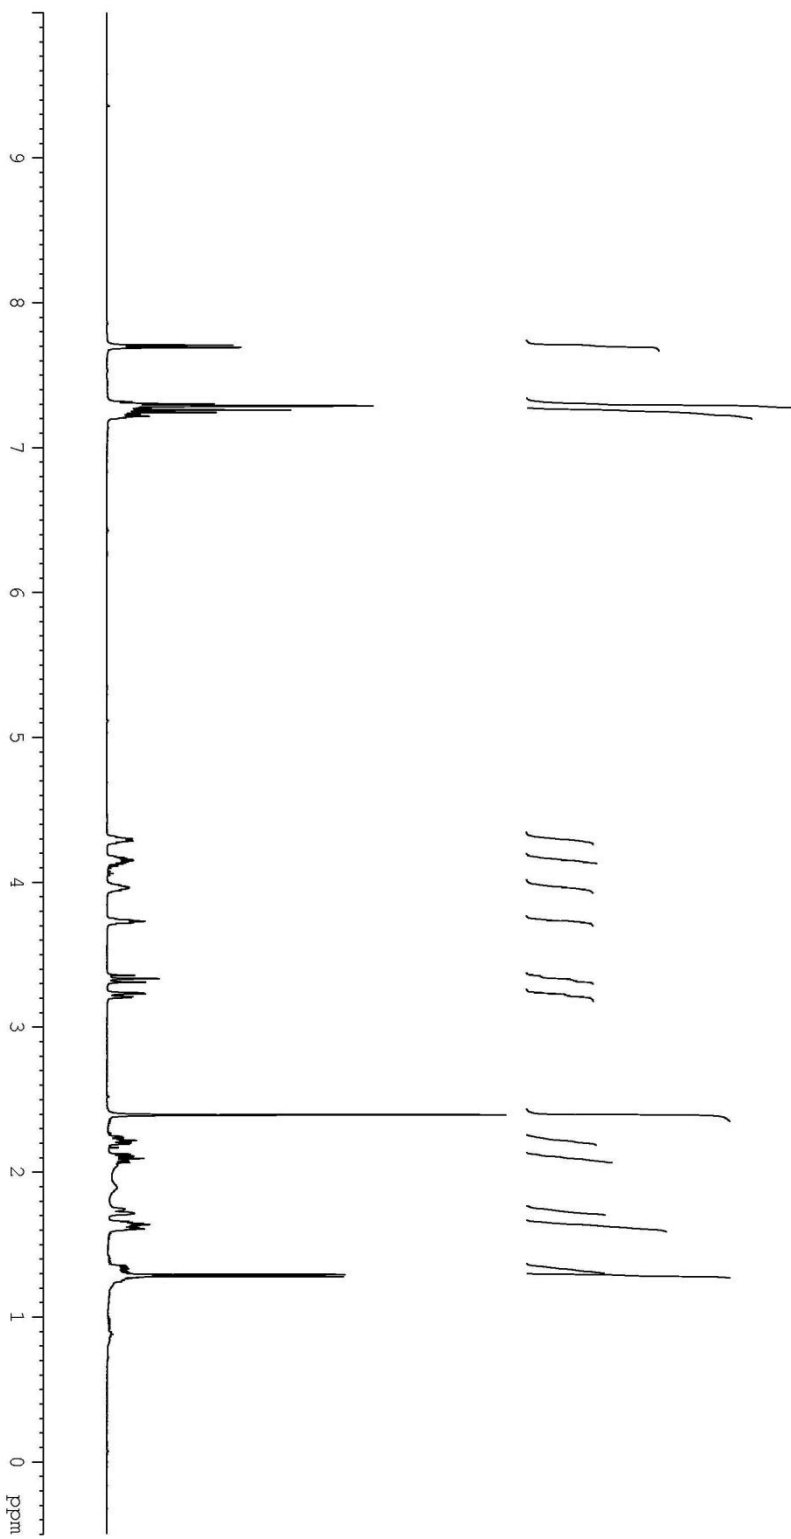

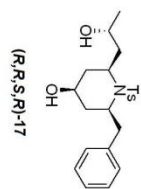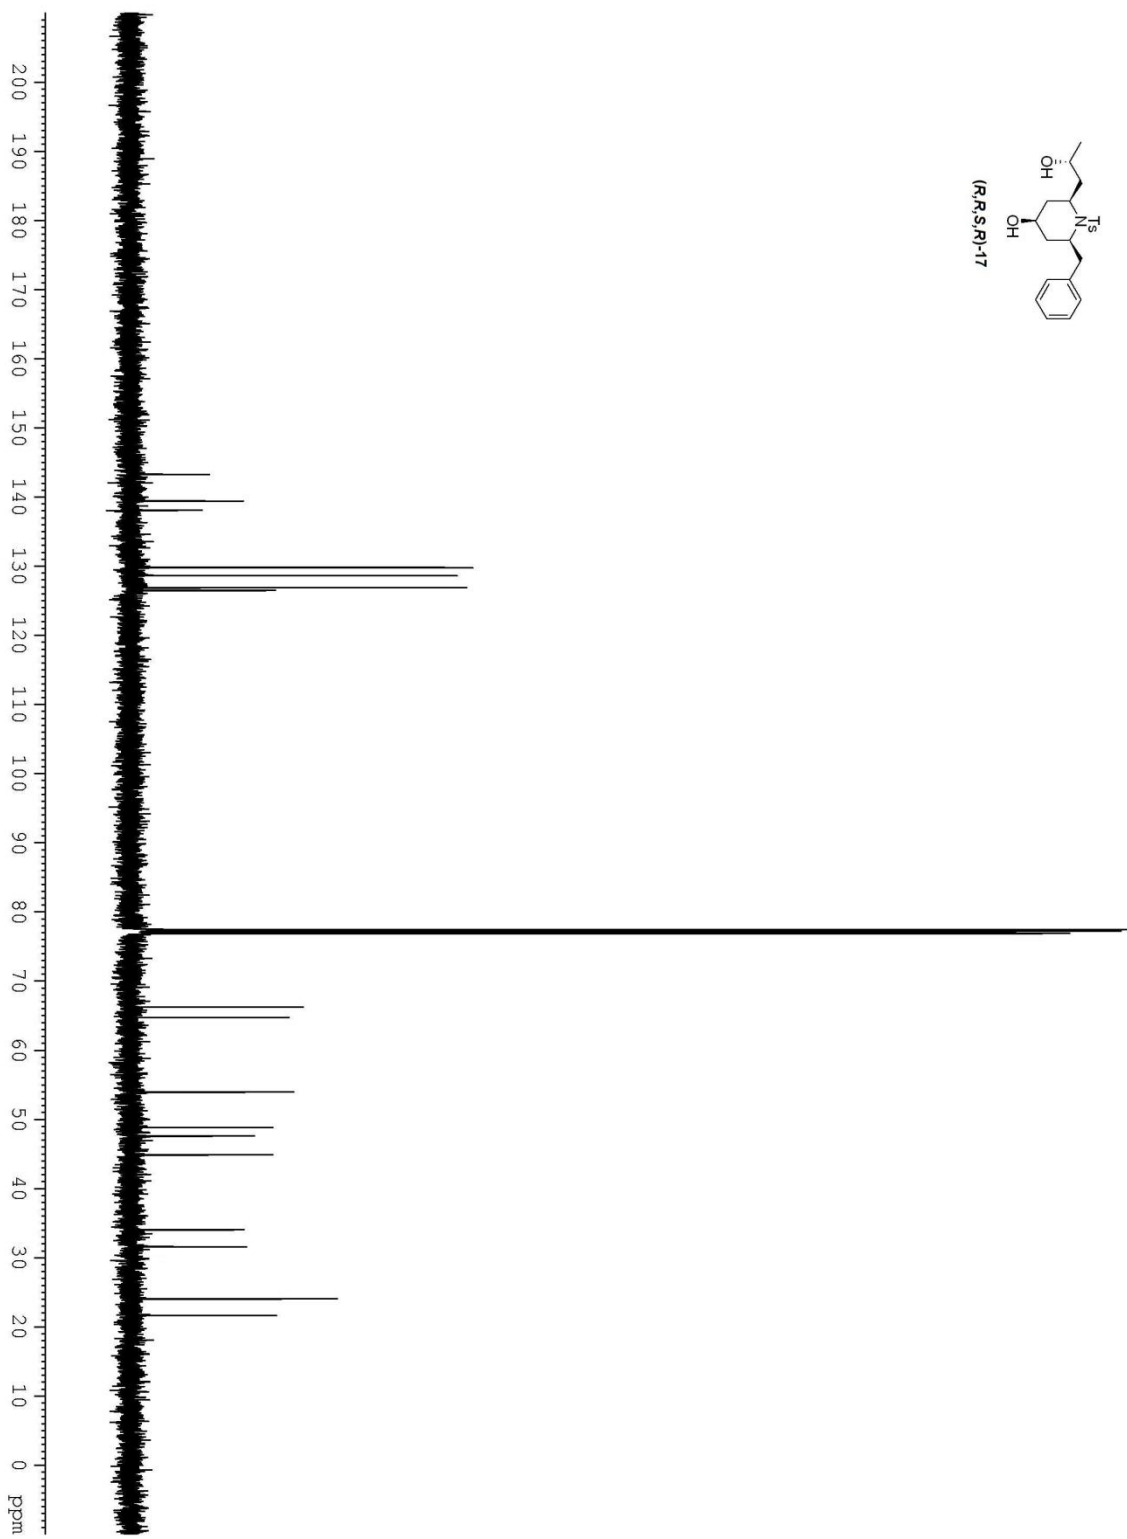



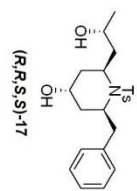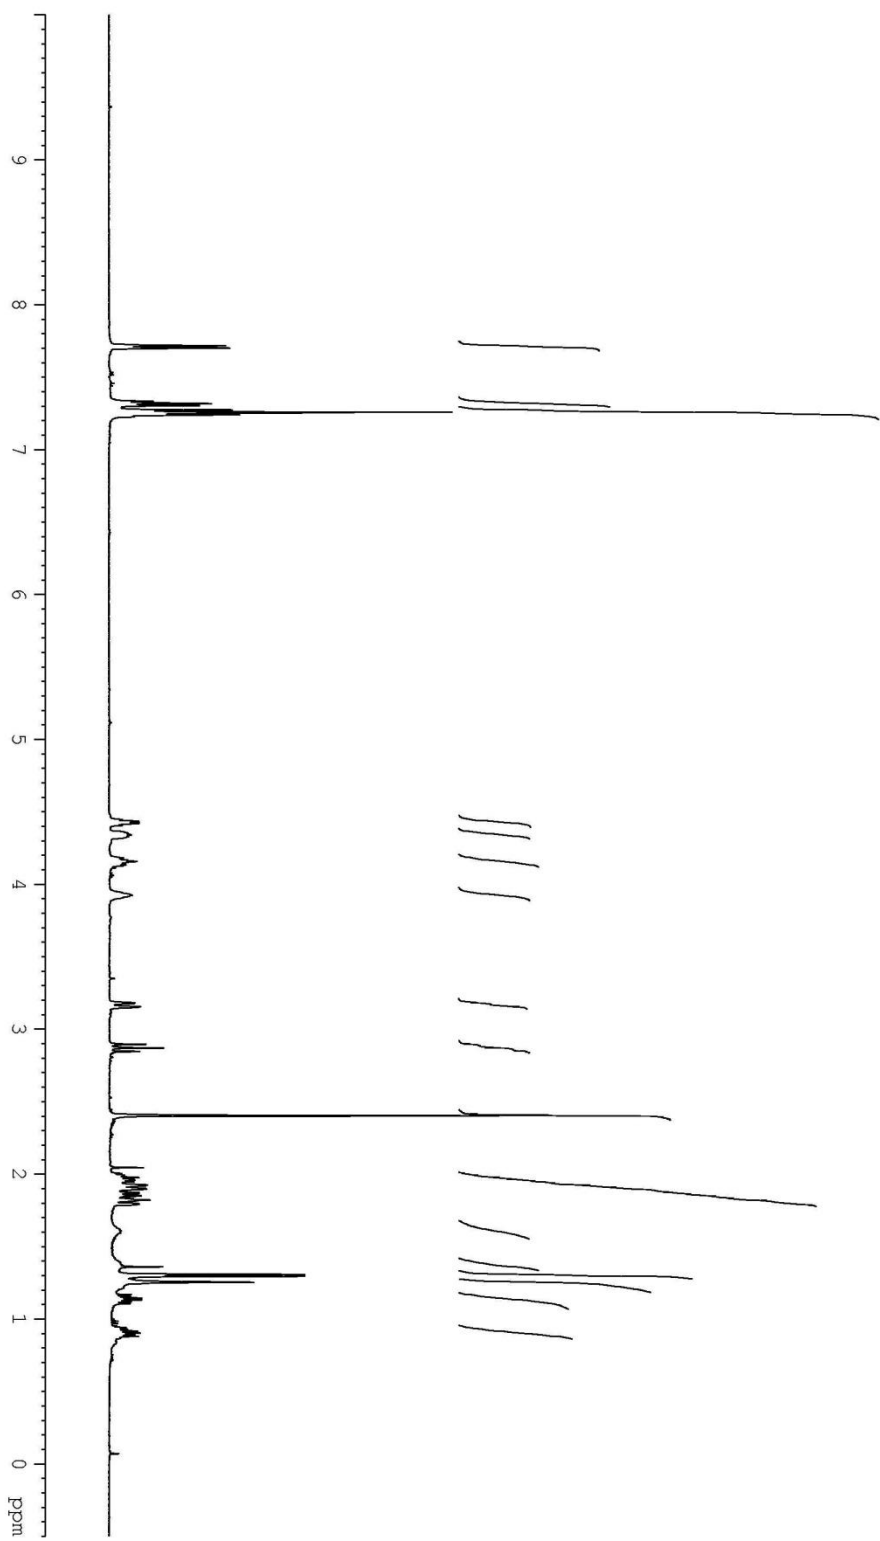

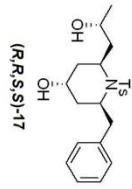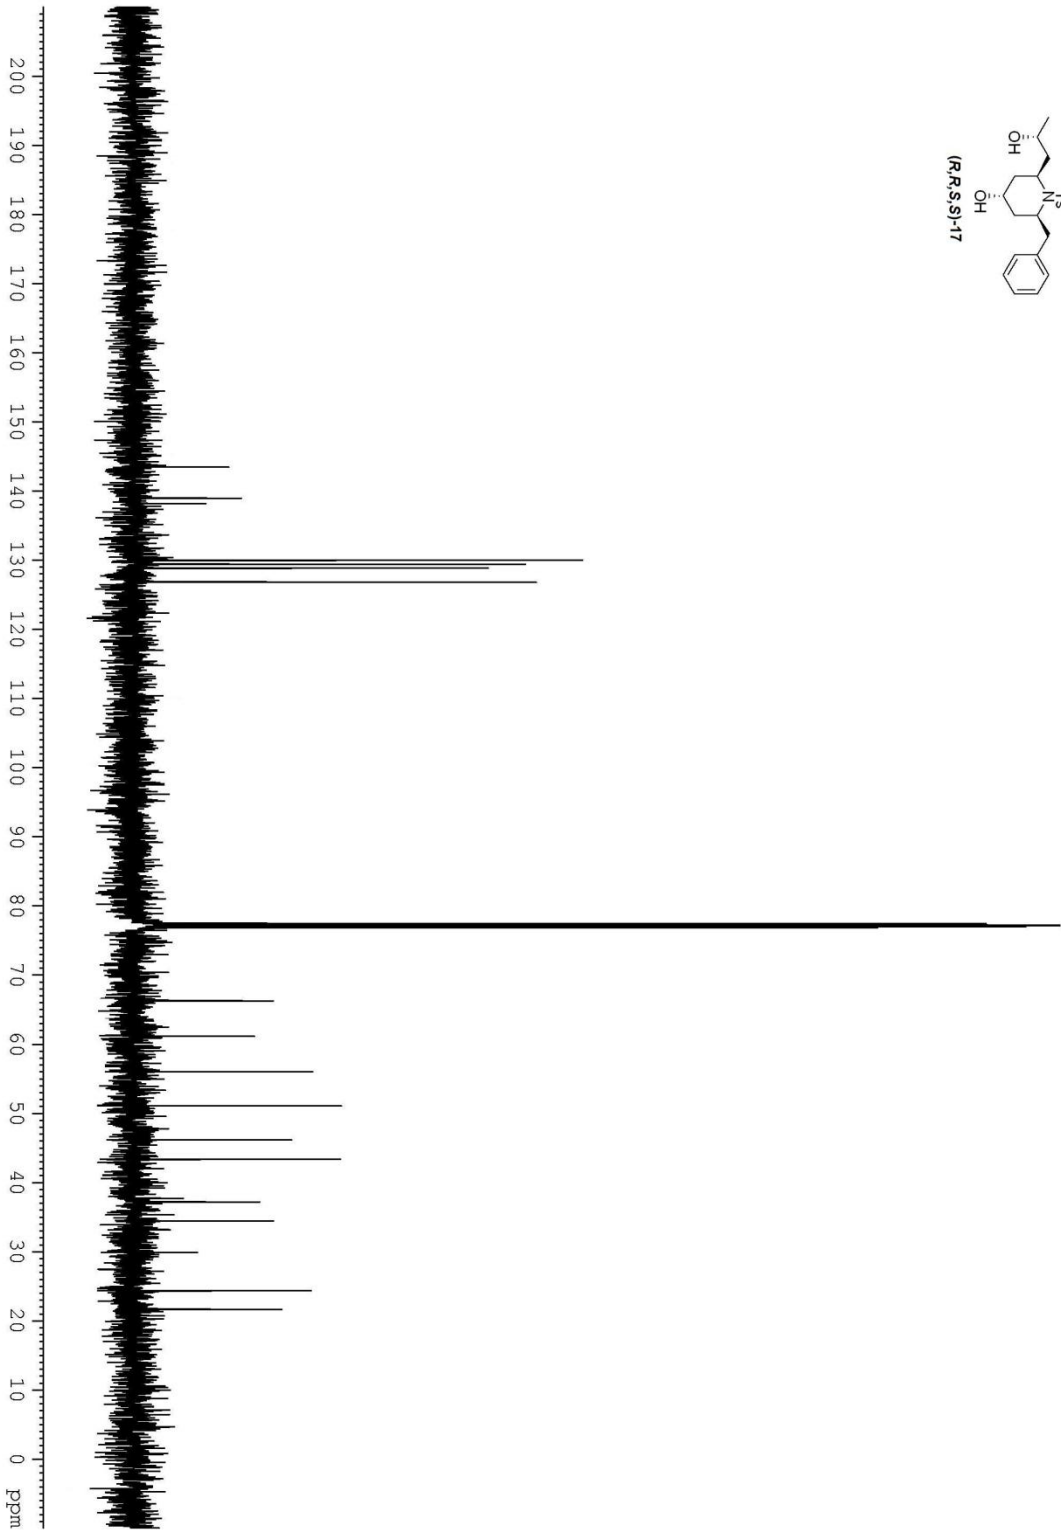

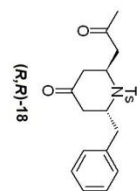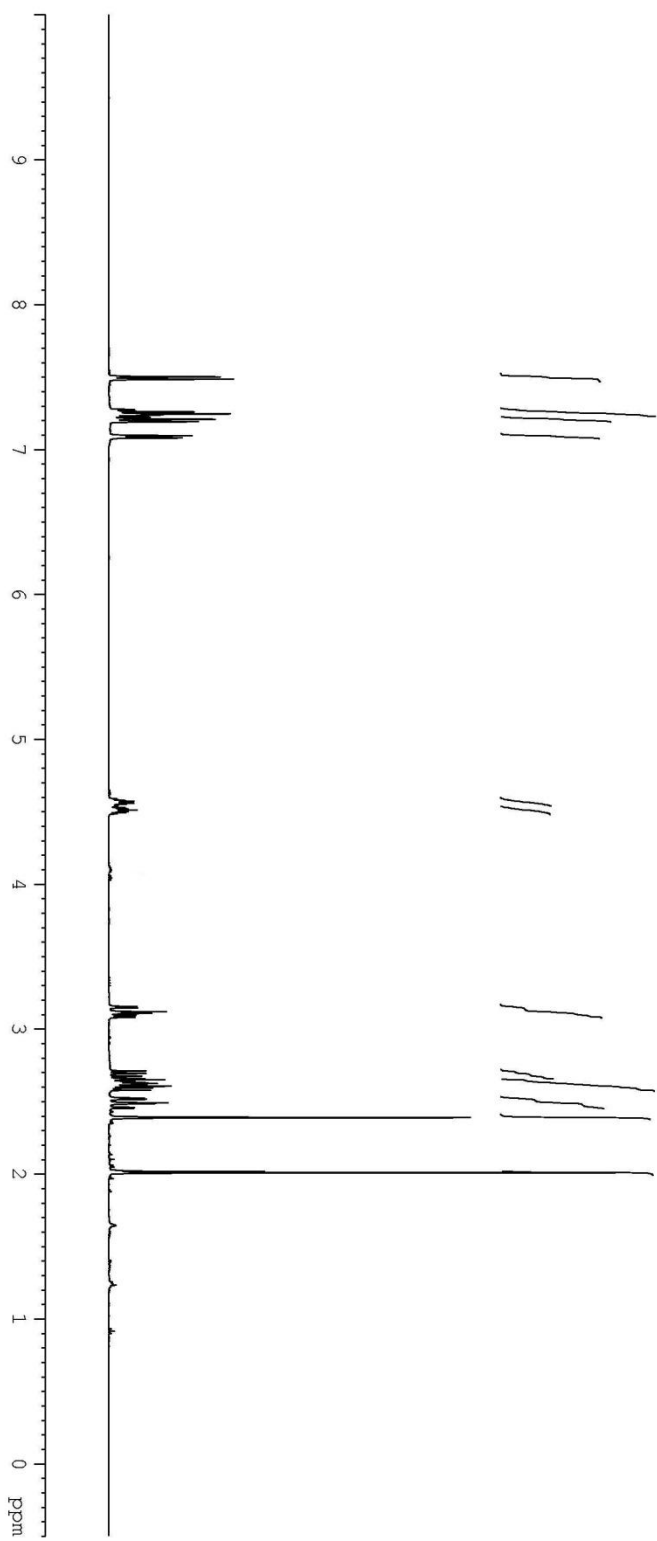

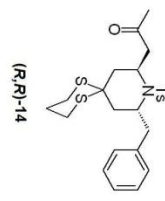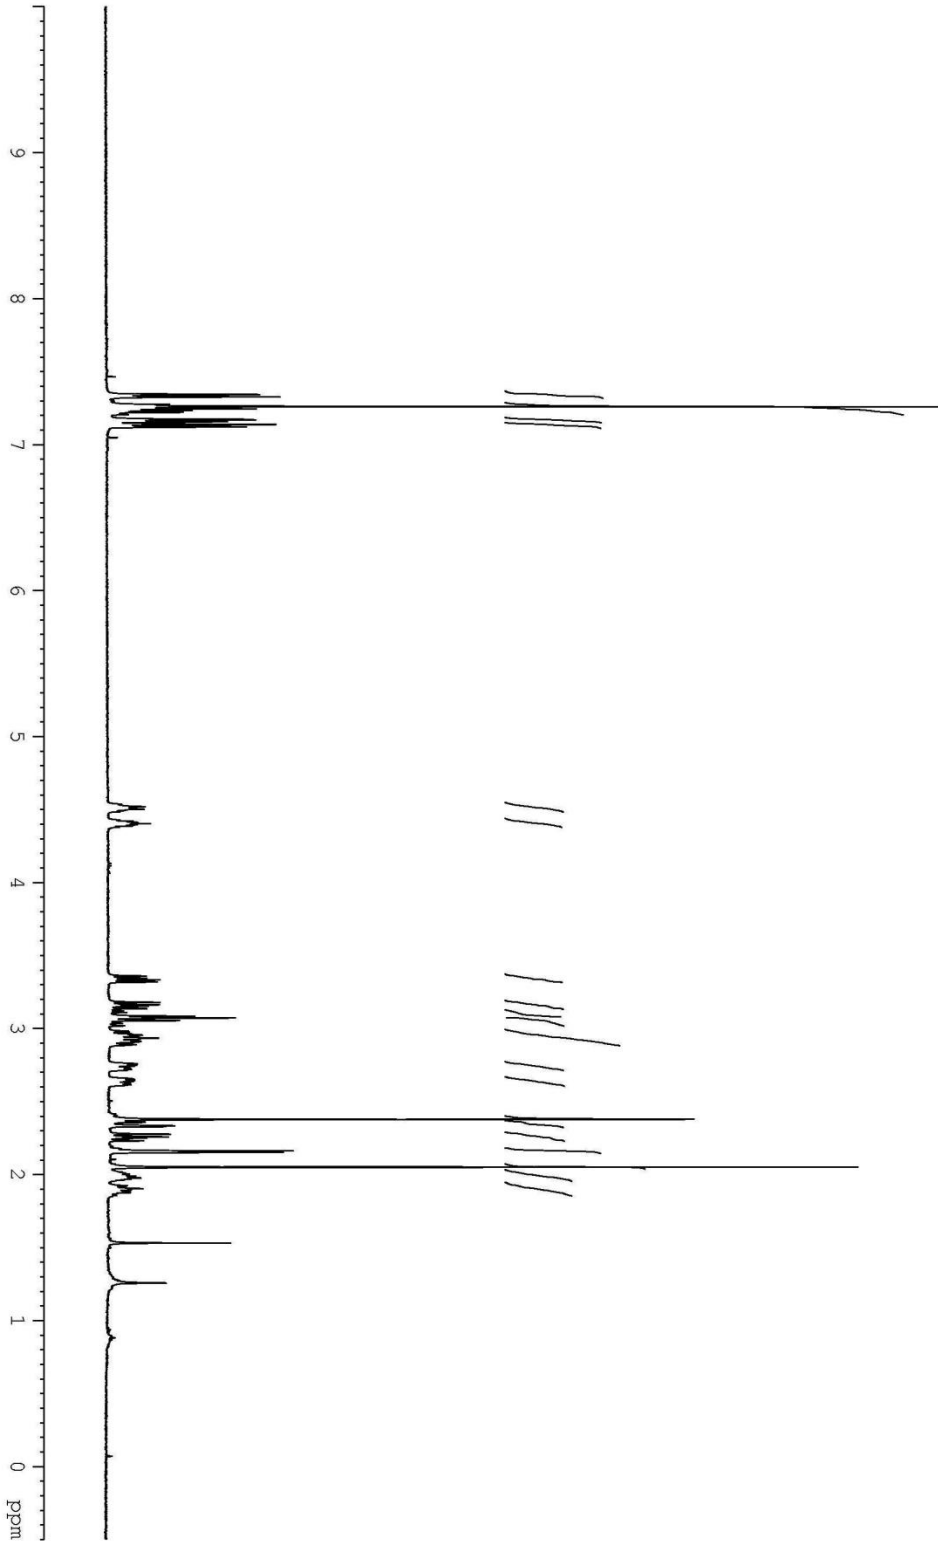

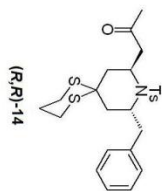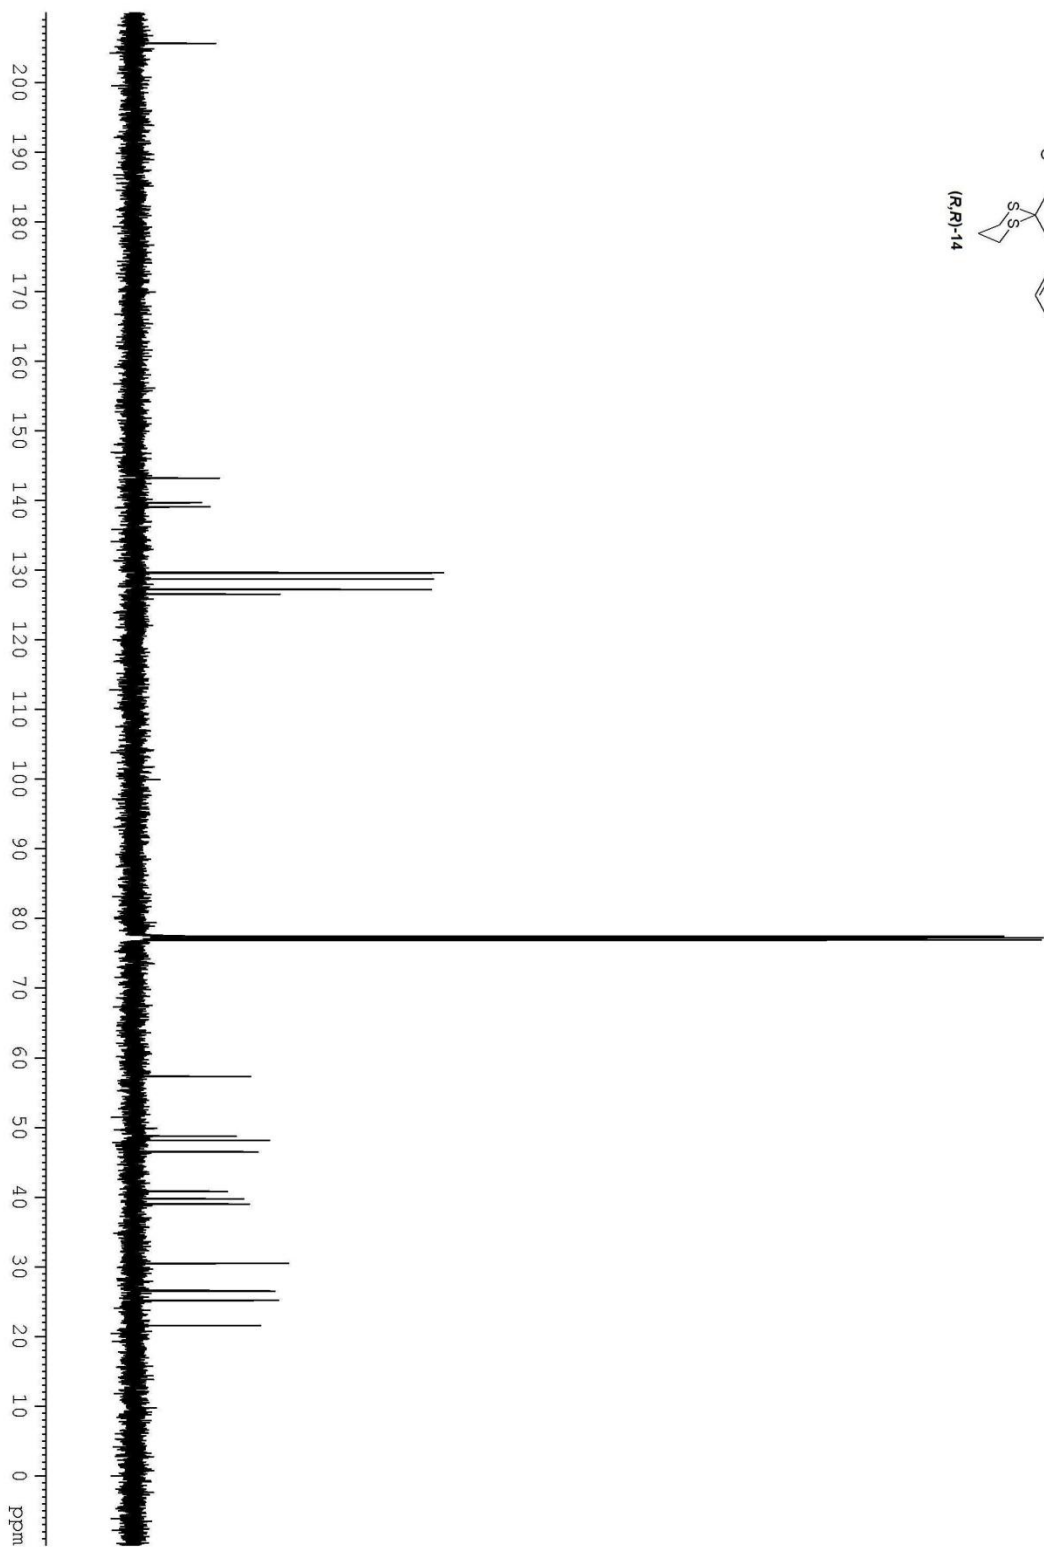



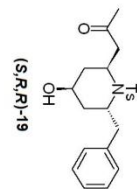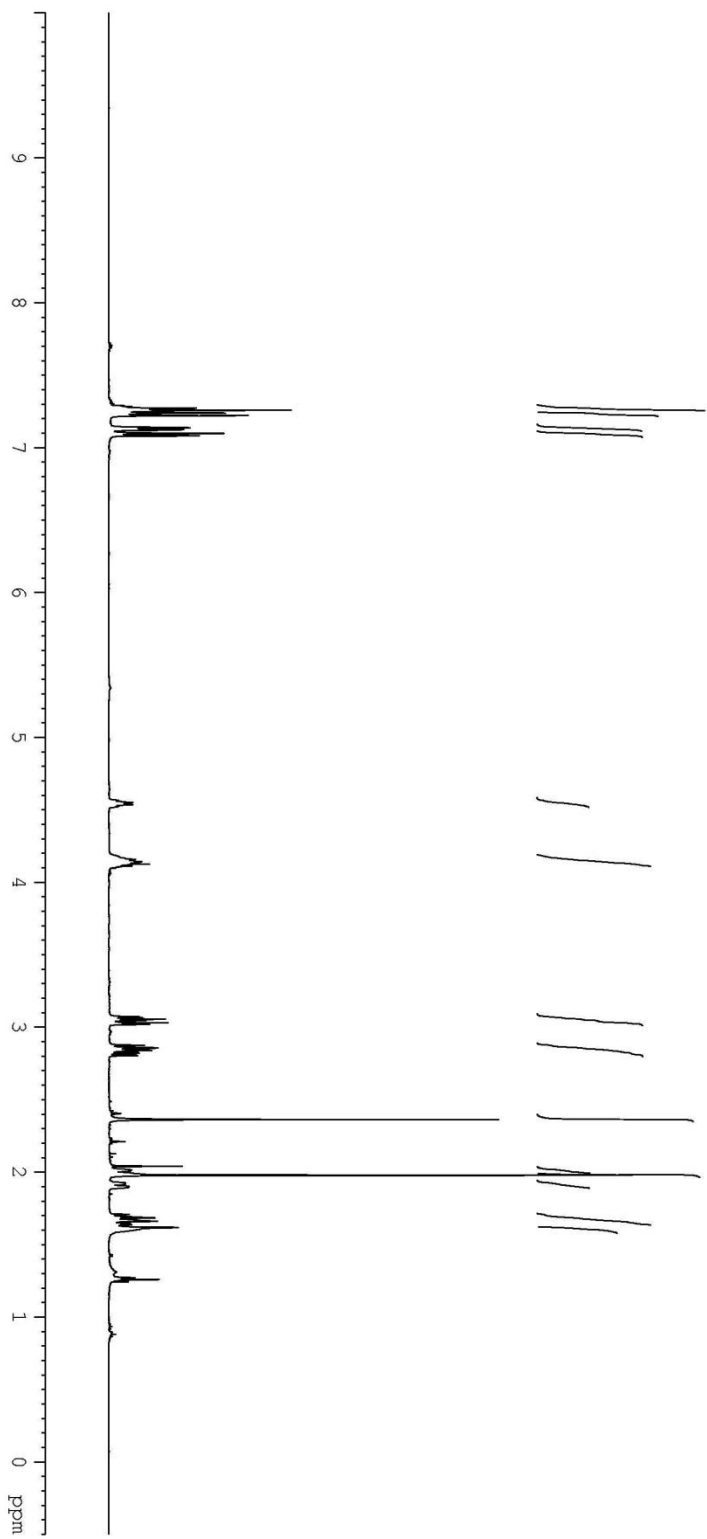





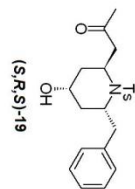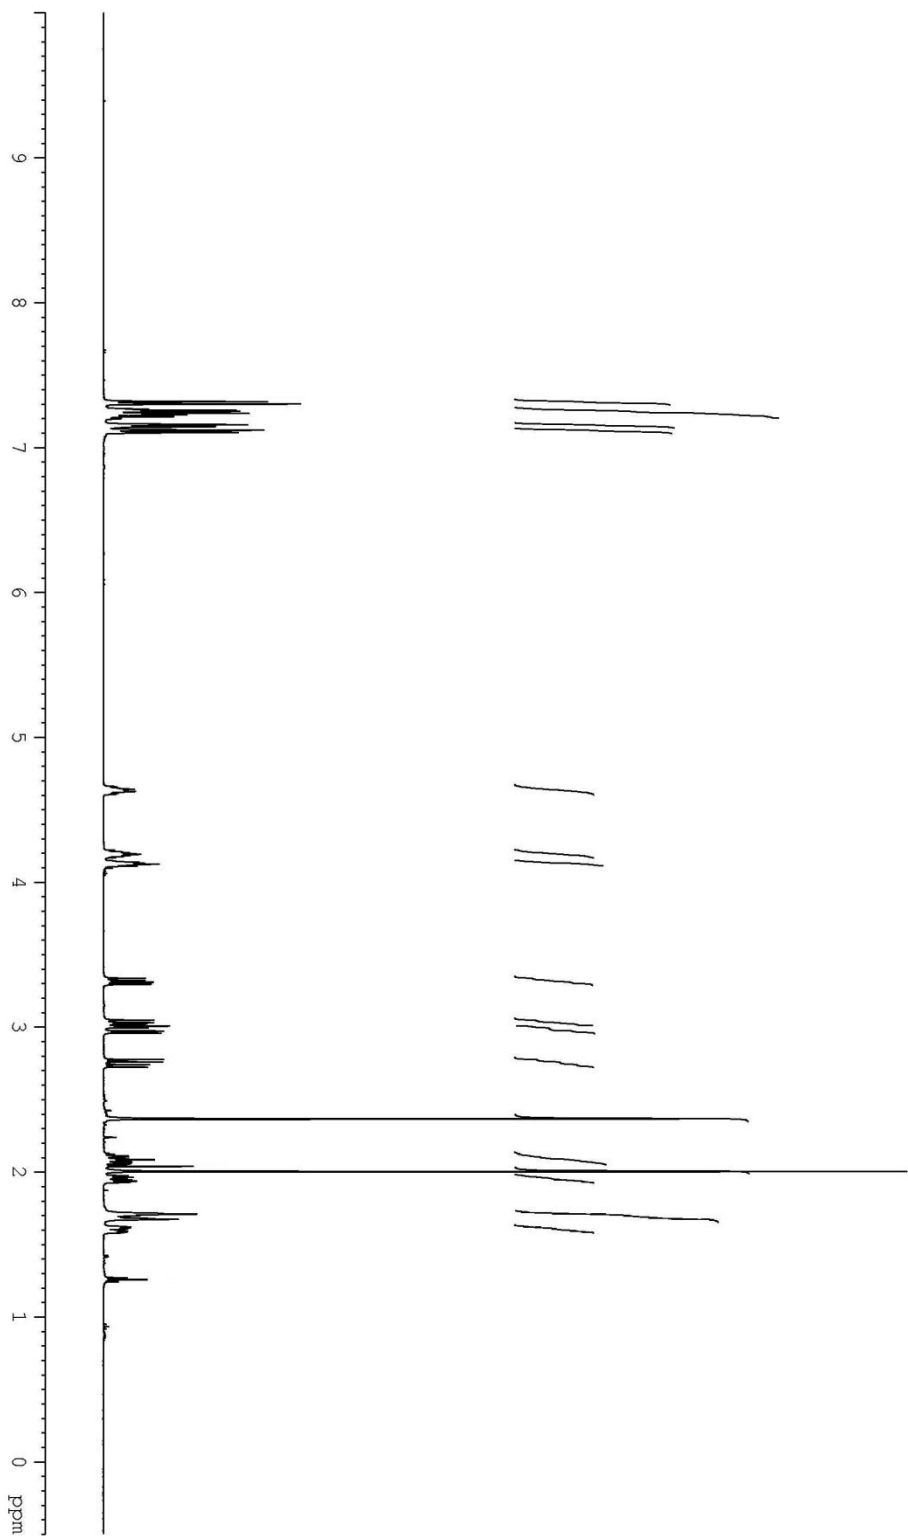

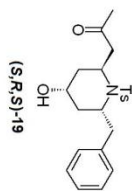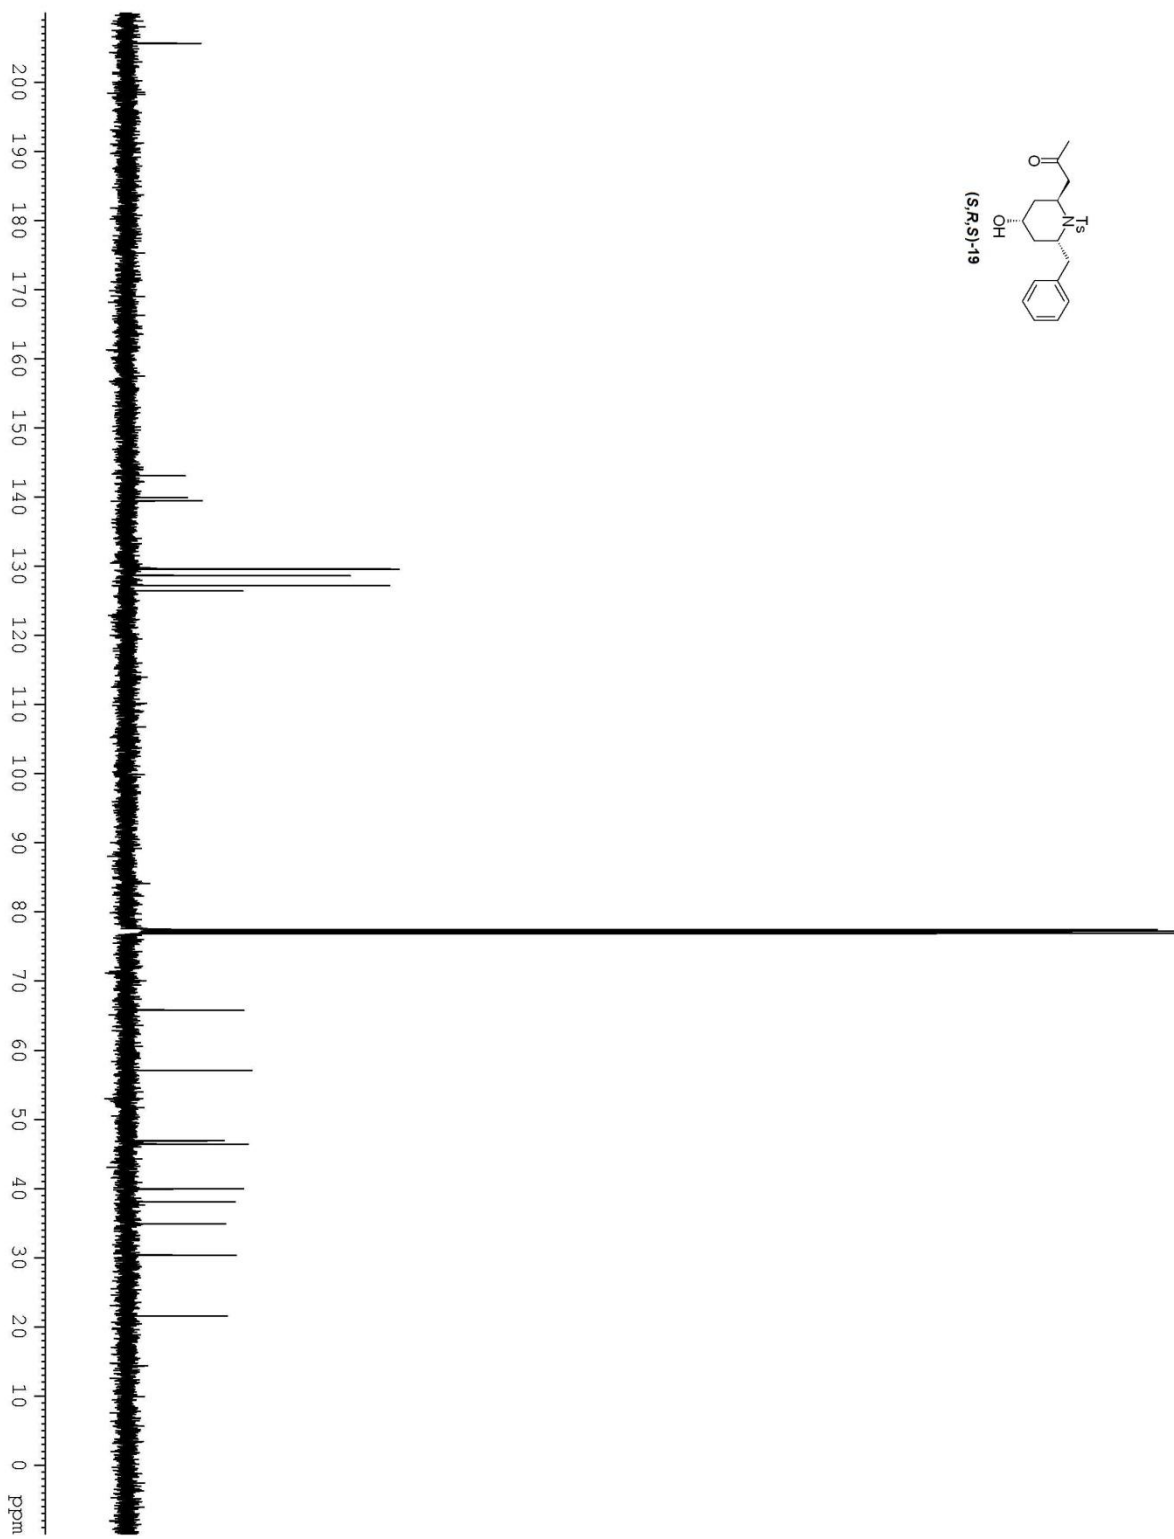

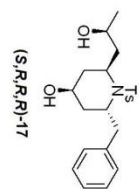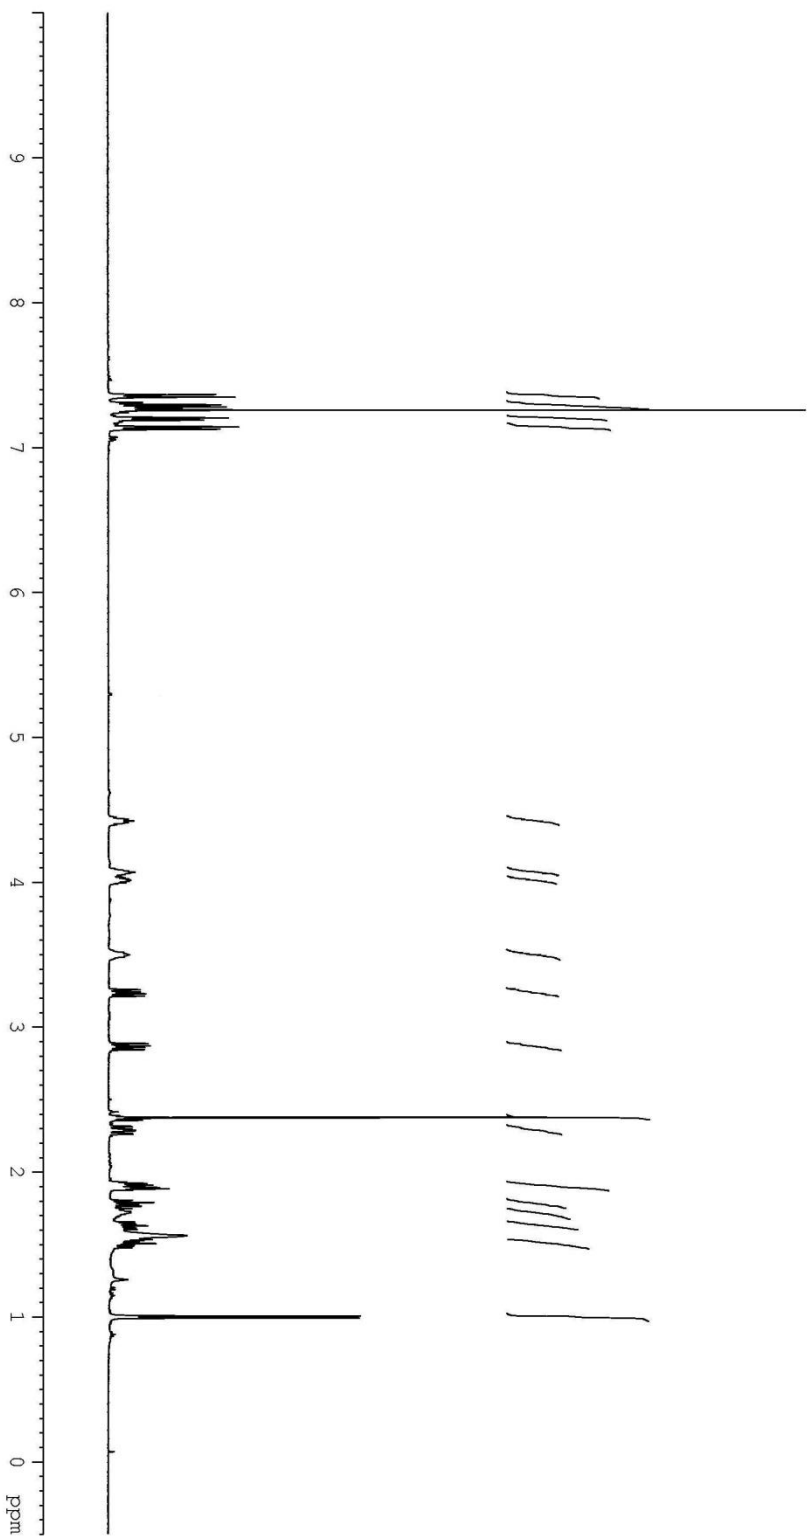

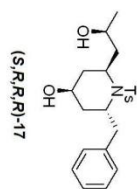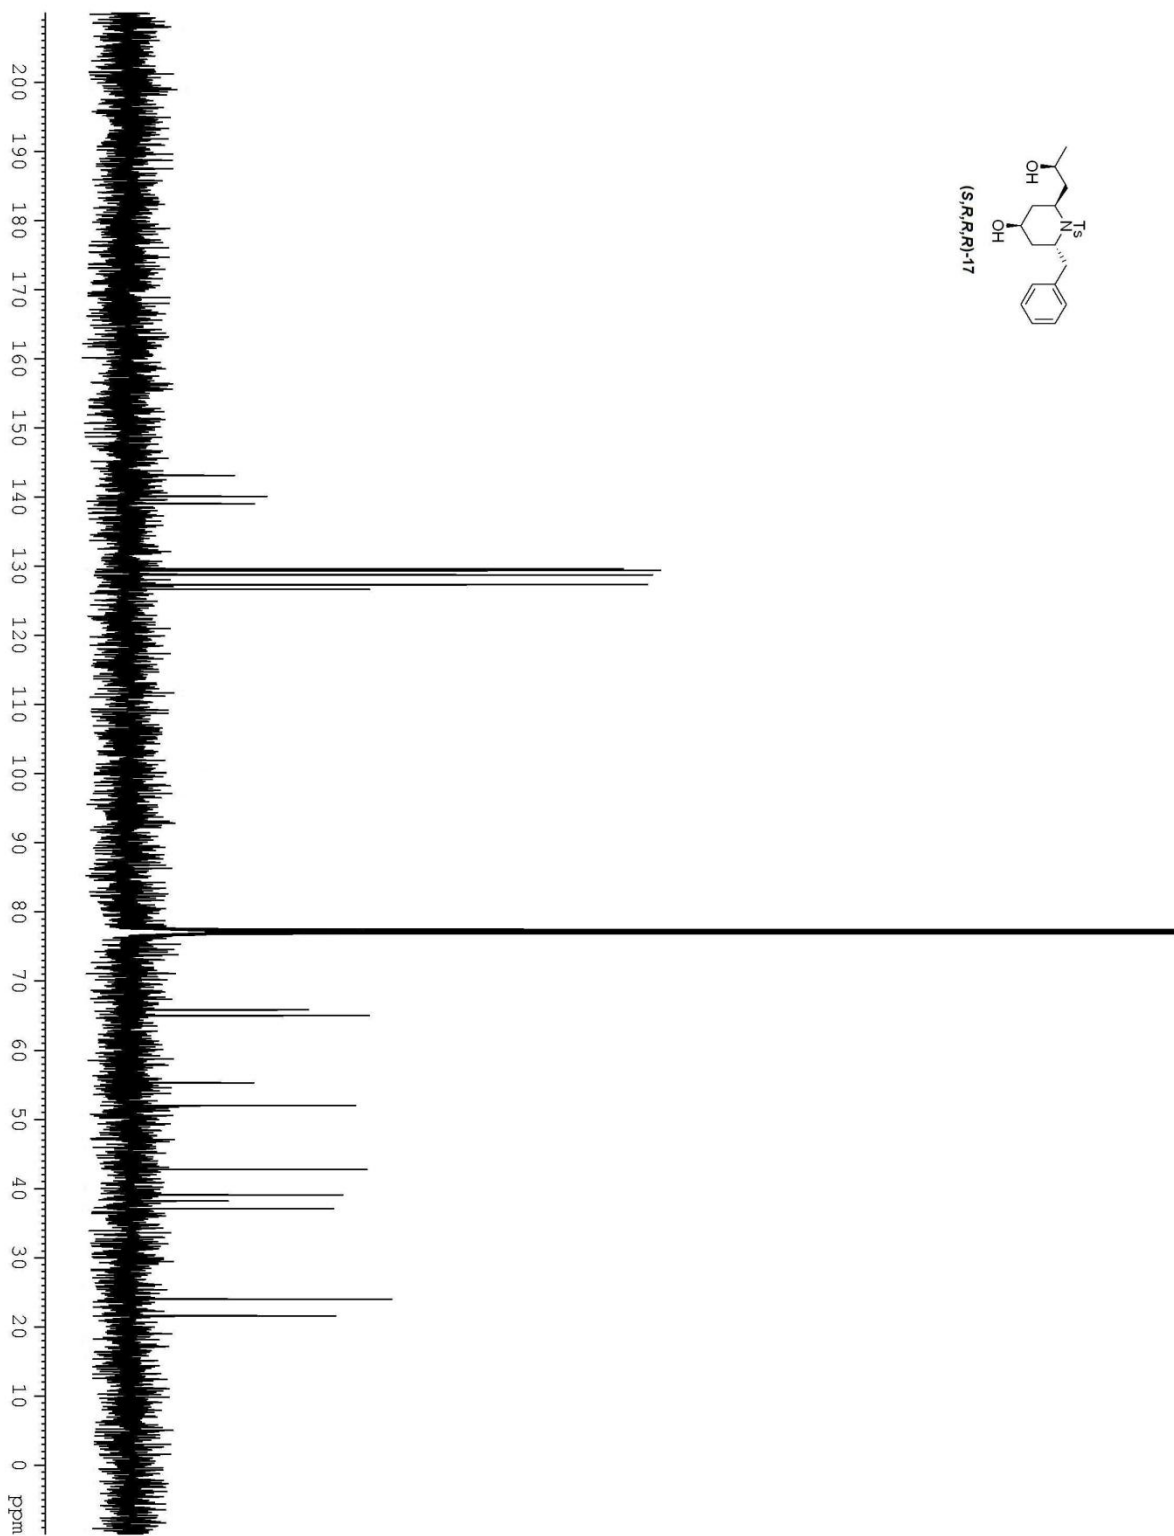

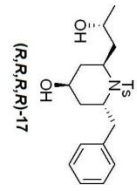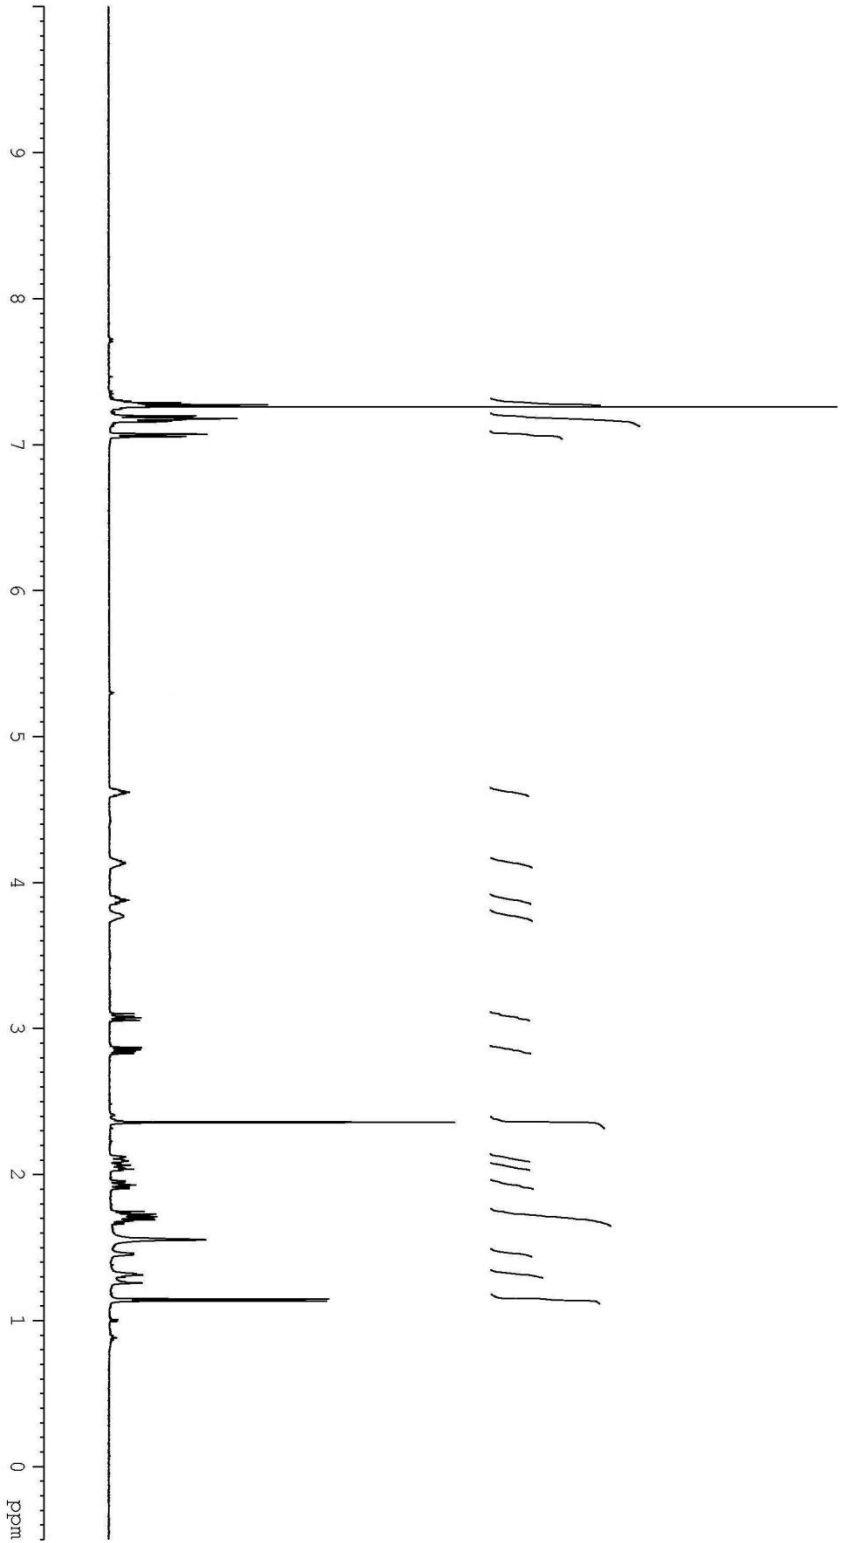

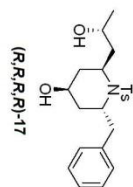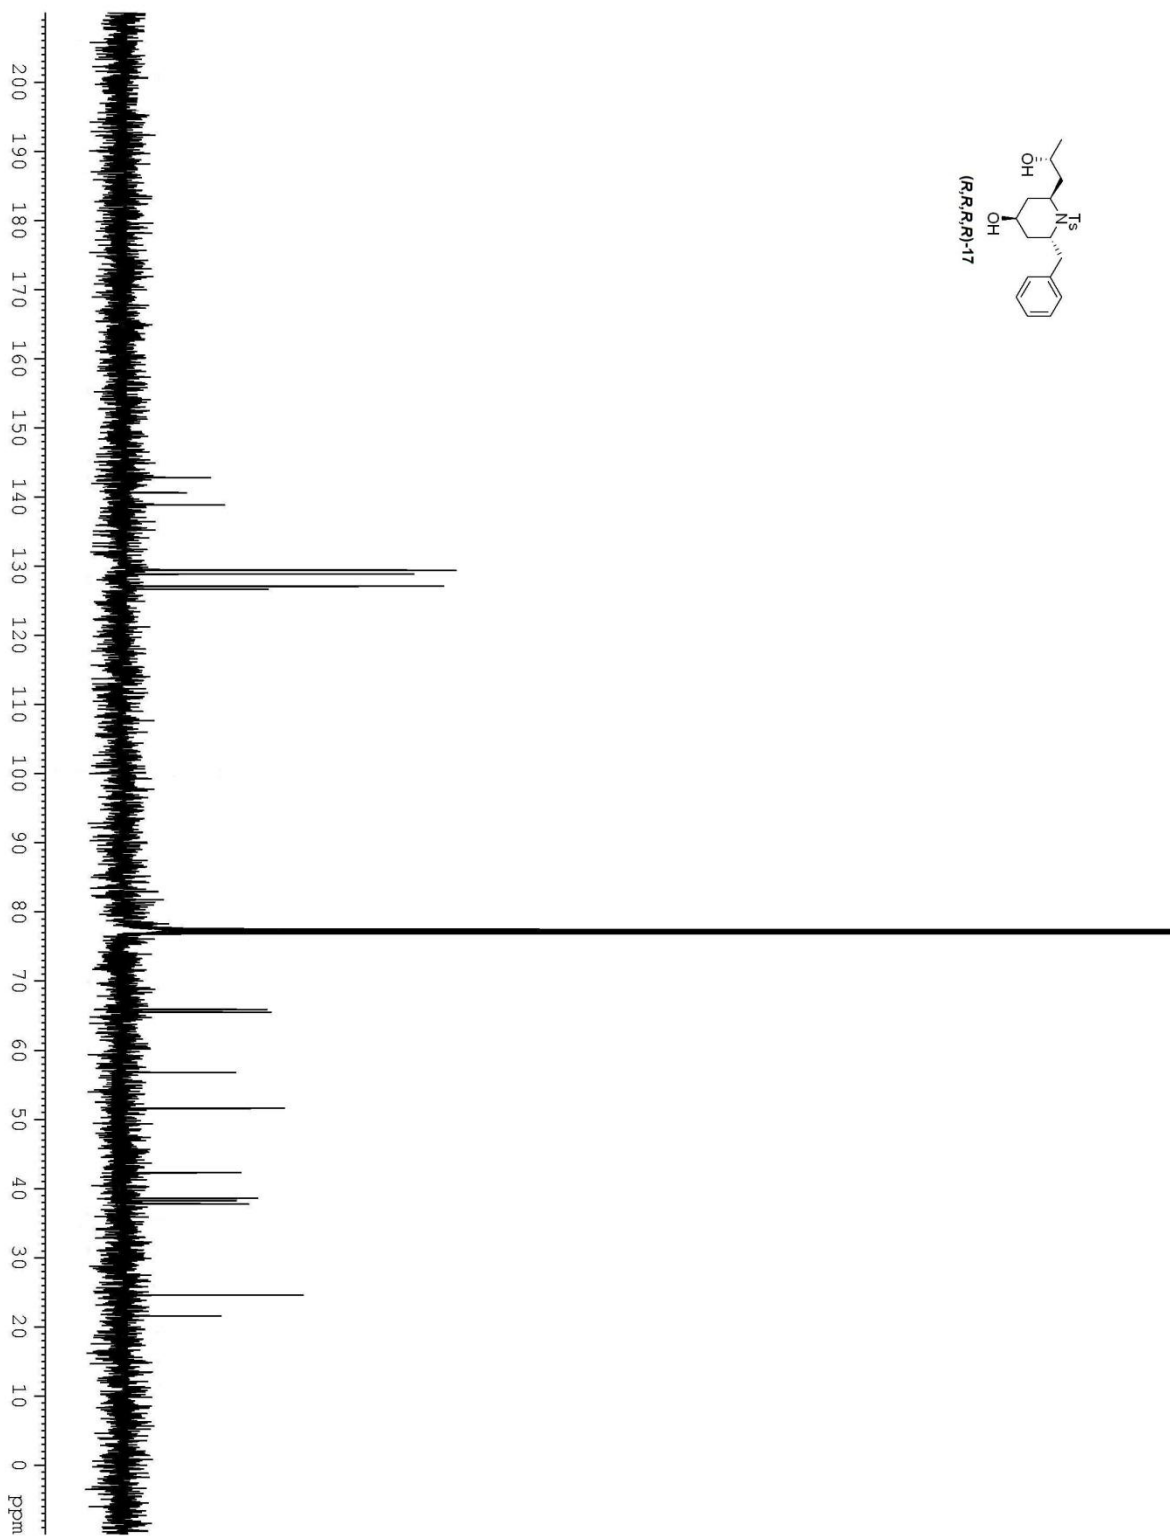

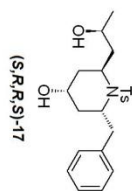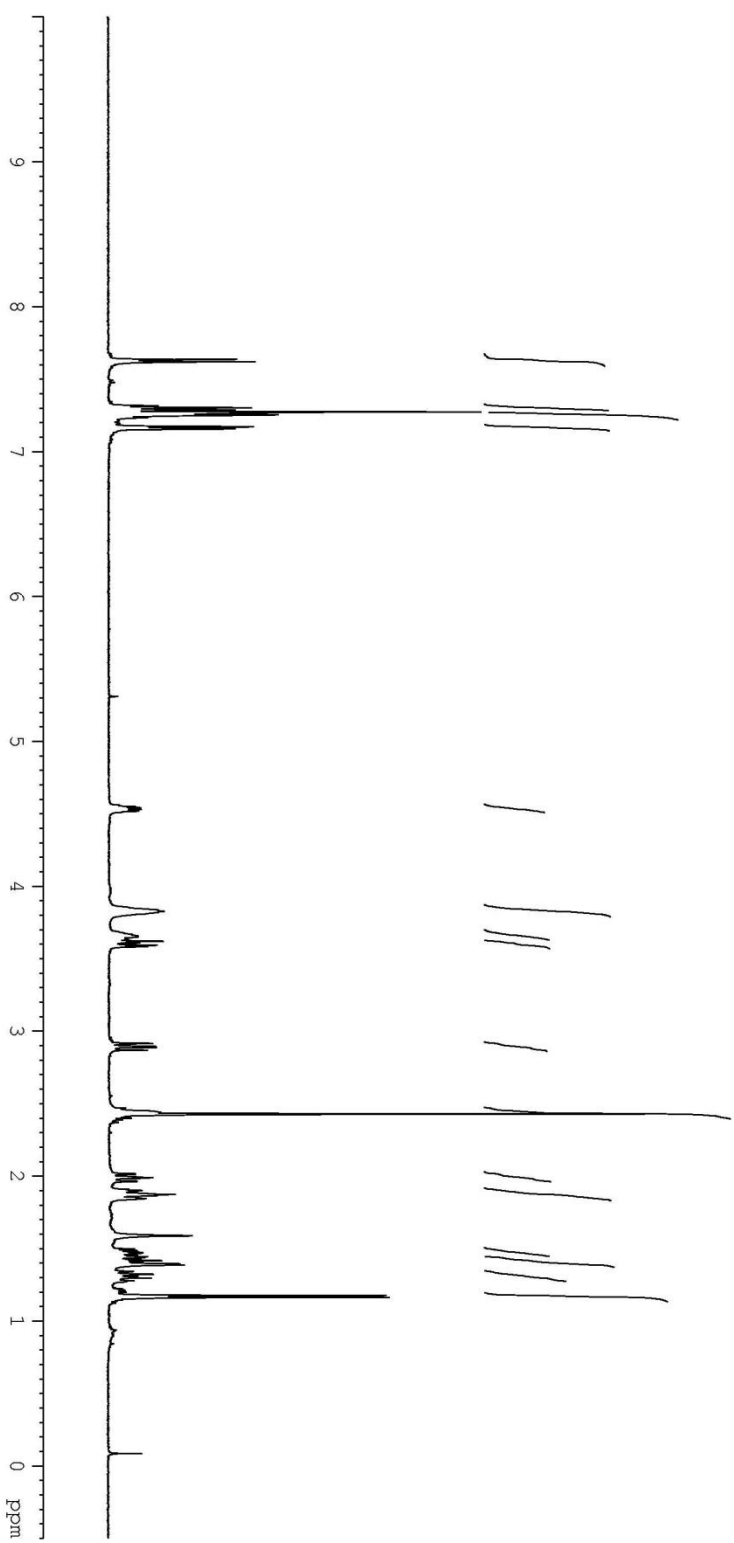

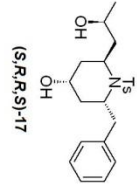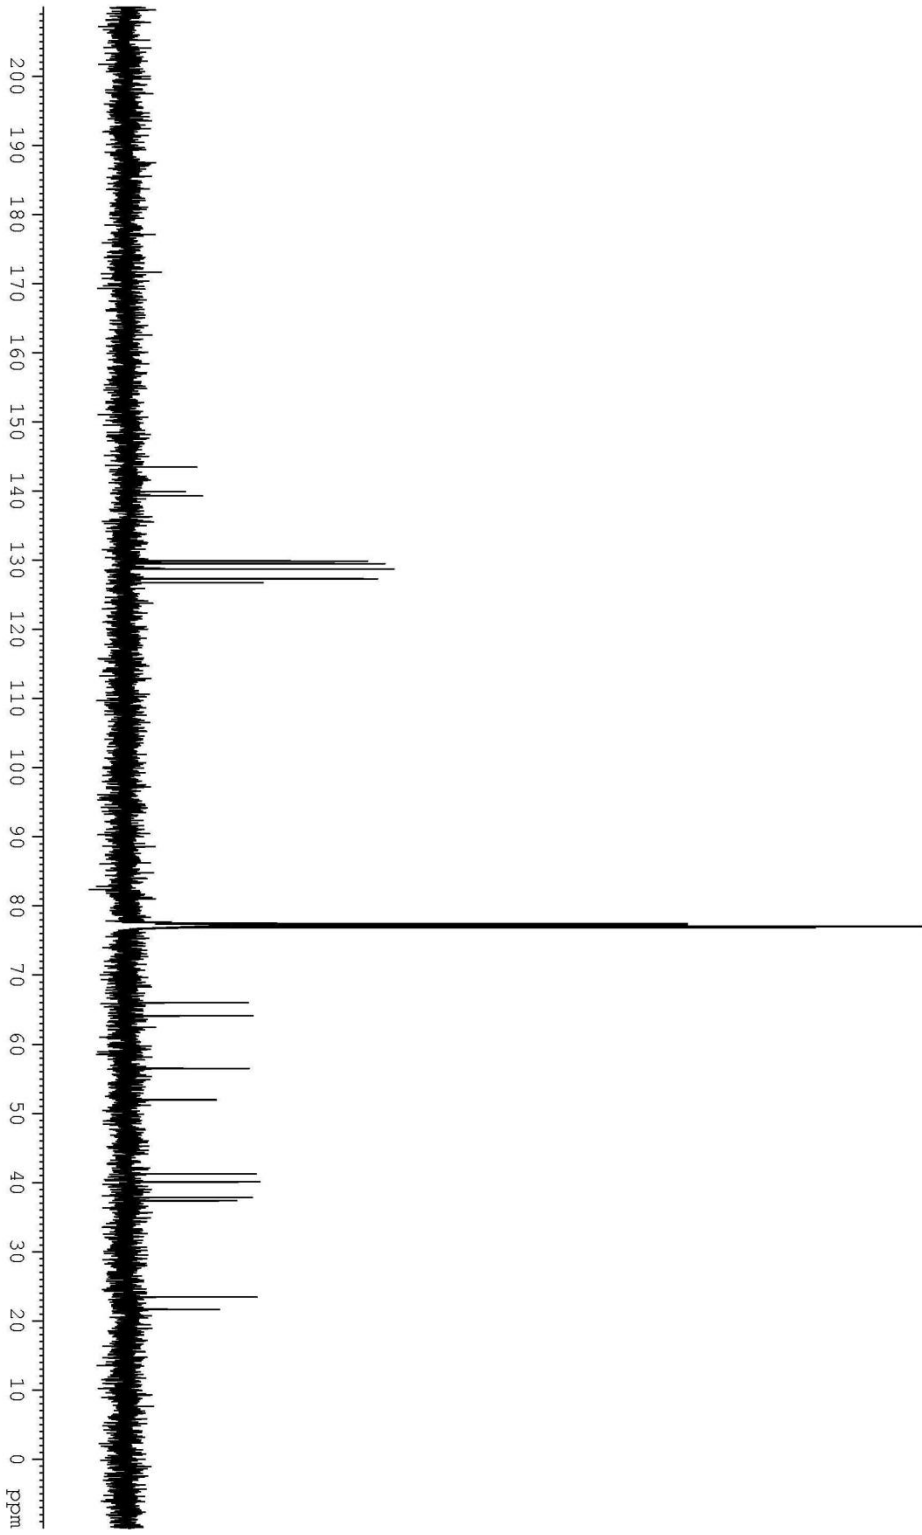



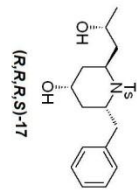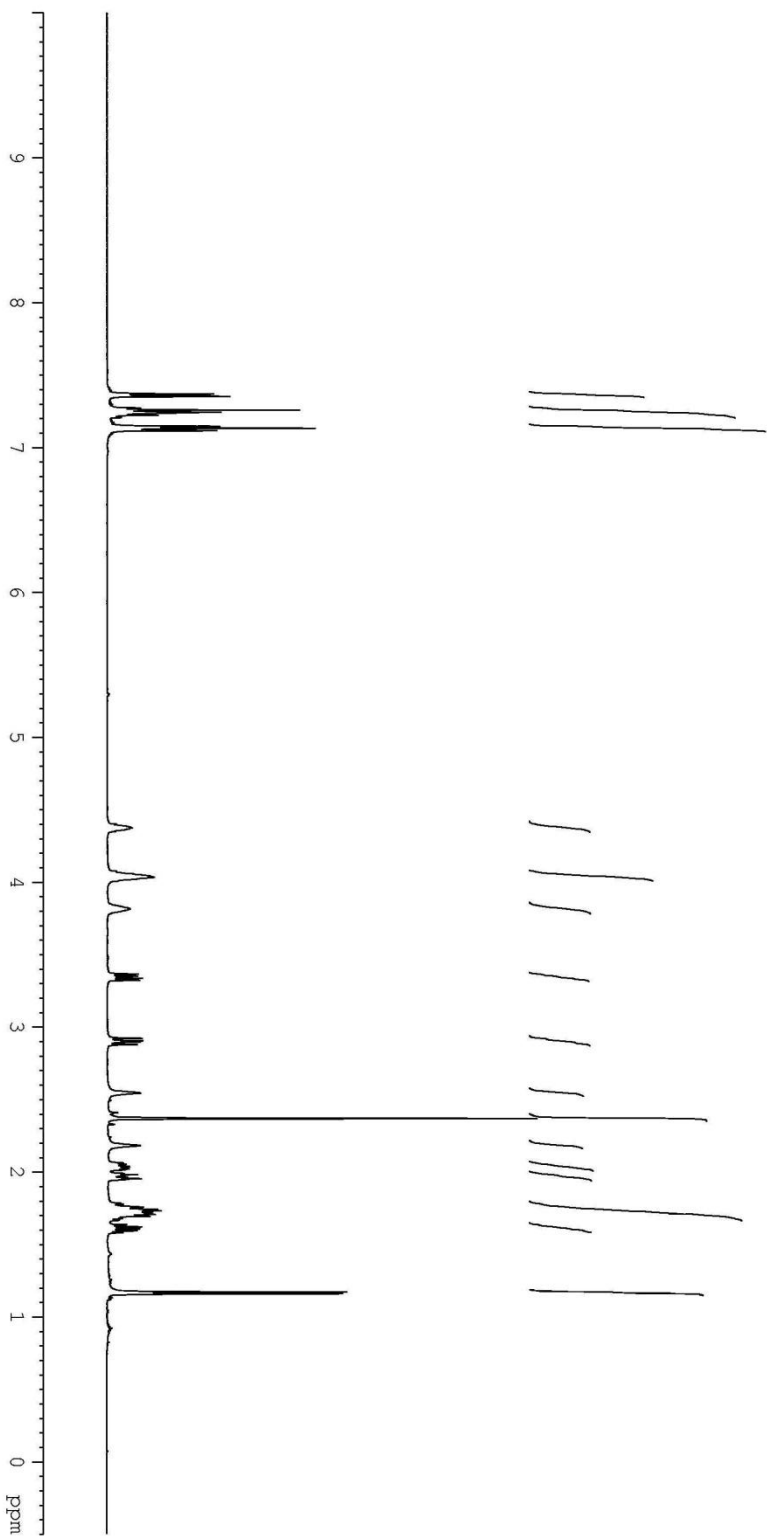

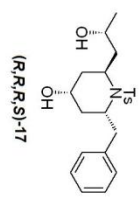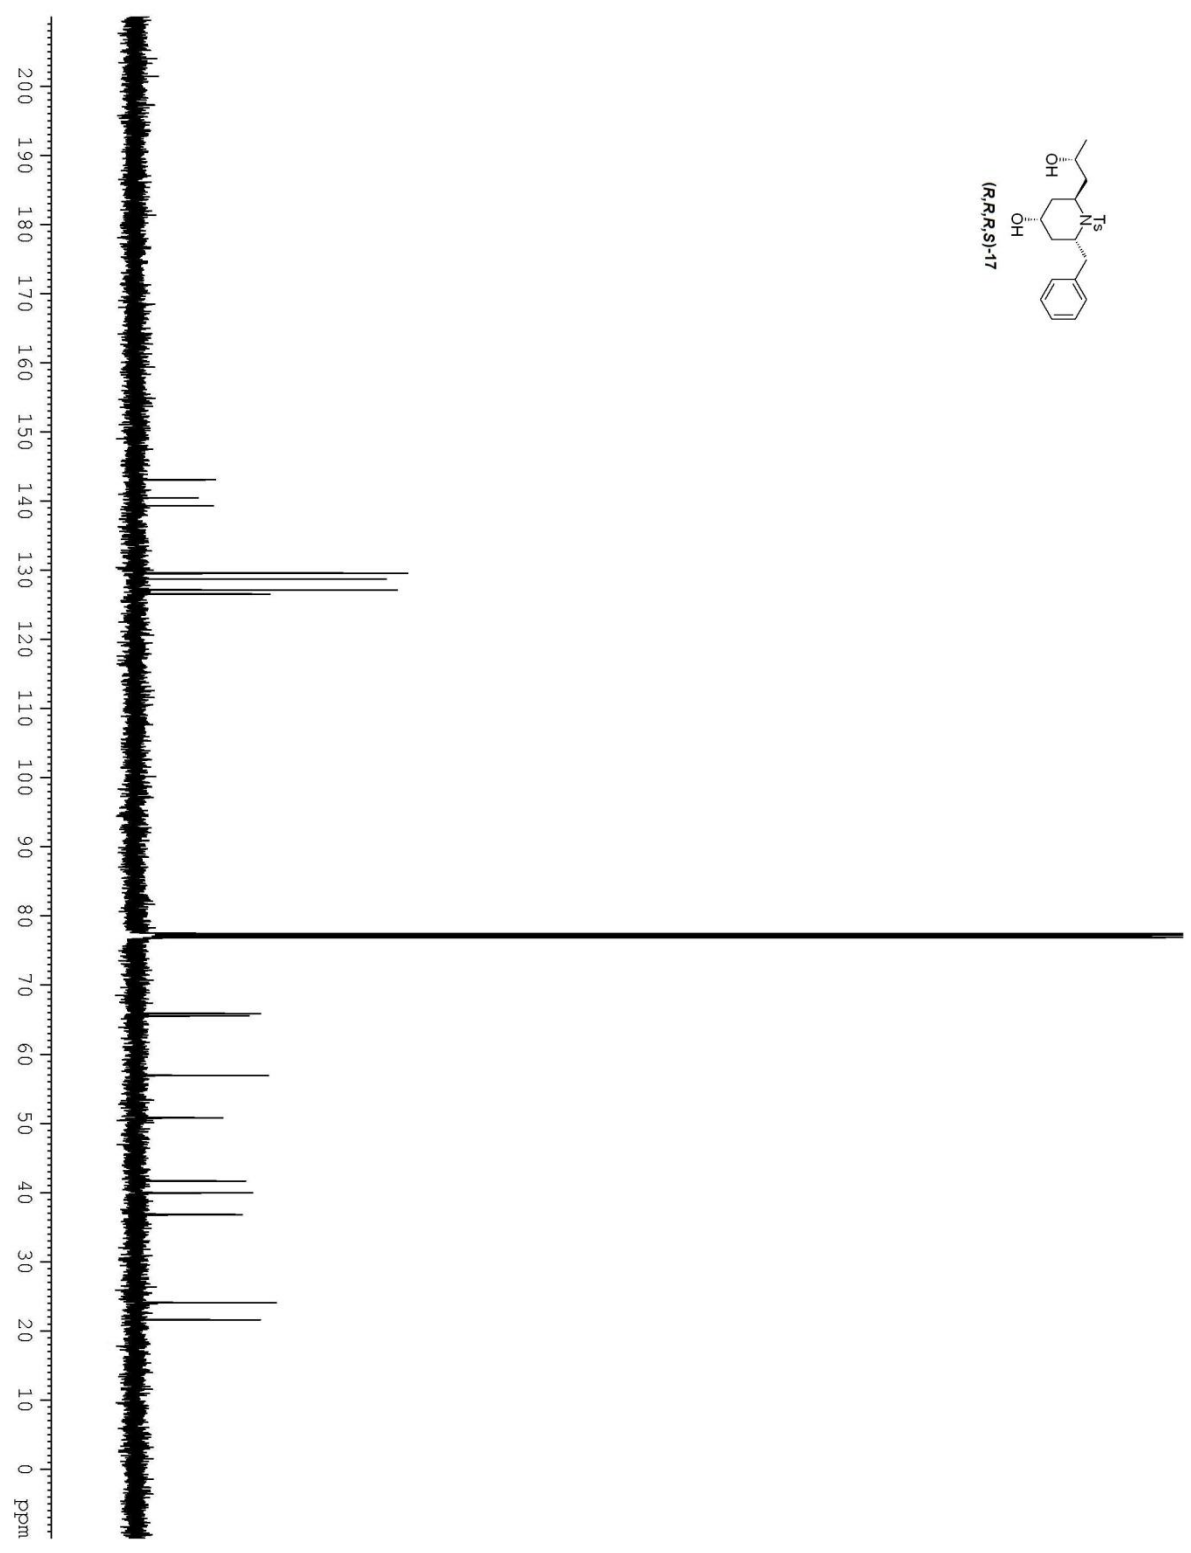

**X-ray Structure Determination of Compound (*R,R,S,R*)-17**

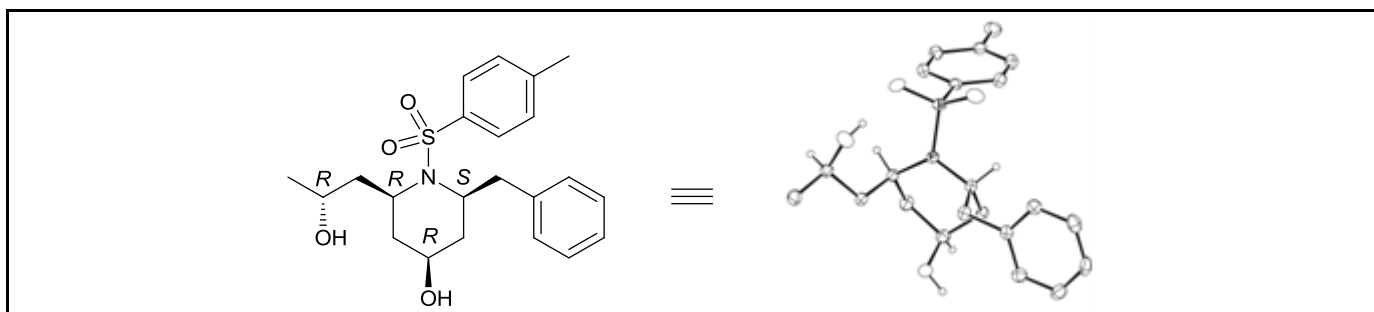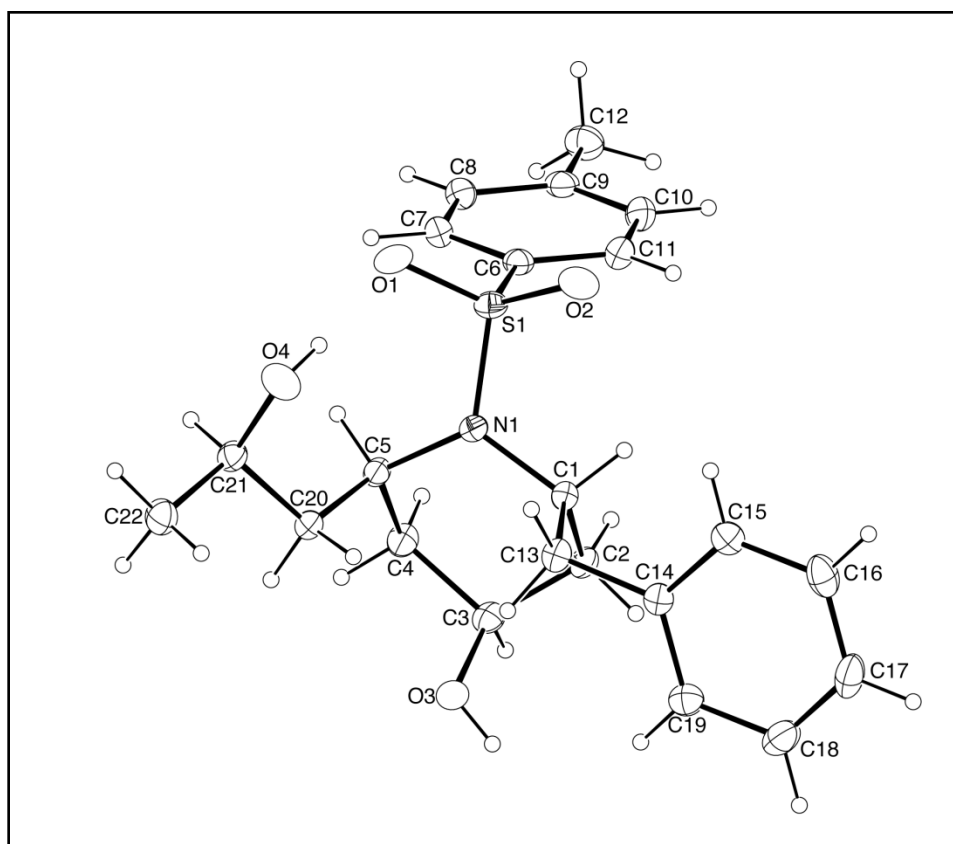

Figure 1. ORTEP drawing of the title compound with 30% probability thermal ellipsoids.

**Table 1. Summary of Structure Determination of Compound (R,R,S,R)-17**

|                                   |                                                  |
|-----------------------------------|--------------------------------------------------|
| Empirical formula                 | C <sub>22</sub> H <sub>29</sub> NSO <sub>4</sub> |
| Formula weight                    | 403.52                                           |
| Temperature                       | 143(1) K                                         |
| Wavelength                        | 0.71073 Å                                        |
| Crystal system                    | orthorhombic                                     |
| Space group                       | P2 <sub>1</sub> 2 <sub>1</sub> 2 <sub>1</sub>    |
| Cell constants:                   |                                                  |
| a                                 | 8.0248(5) Å                                      |
| b                                 | 12.4438(8) Å                                     |
| c                                 | 20.5847(14) Å                                    |
| Volume                            | 2055.6(2) Å <sup>3</sup>                         |
| Z                                 | 4                                                |
| Density (calculated)              | 1.304 Mg/m <sup>3</sup>                          |
| Absorption coefficient            | 0.185 mm <sup>-1</sup>                           |
| F(000)                            | 864                                              |
| Crystal size                      | 0.32 x 0.30 x 0.22 mm <sup>3</sup>               |
| Theta range for data collection   | 2.57 to 25.02°                                   |
| Index ranges                      | -9 ≤ h ≤ 9, -14 ≤ k ≤ 14, -24 ≤ l ≤ 24           |
| Reflections collected             | 27757                                            |
| Independent reflections           | 3629 [R(int) = 0.0191]                           |
| Completeness to theta = 25.02°    | 99.9 %                                           |
| Absorption correction             | Semi-empirical from equivalents                  |
| Max. and min. transmission        | 1.0000 and 0.8654                                |
| Refinement method                 | Full-matrix least-squares on F <sup>2</sup>      |
| Data / restraints / parameters    | 3629 / 0 / 258                                   |
| Goodness-of-fit on F <sup>2</sup> | 1.068                                            |
| Final R indices [I > 2σ(I)]       | R1 = 0.0292, wR2 = 0.0750                        |
| R indices (all data)              | R1 = 0.0298, wR2 = 0.0759                        |
| Absolute structure parameter      | 0.02(6)                                          |
| Largest diff. peak and hole       | 0.147 and -0.314 e.Å <sup>-3</sup>               |

**Table 2. Refined Positional Parameters for Compound (R,R,S,R)-17**

| Atom | x           | y            | z            | $U_{eq}, \text{\AA}^2$ |
|------|-------------|--------------|--------------|------------------------|
| C1   | 0.39500(18) | 0.51080(12)  | 0.35065(7)   | 0.0236(3)              |
| C2   | 0.24205(19) | 0.44020(13)  | 0.33936(8)   | 0.0260(3)              |
| C3   | 0.22873(19) | 0.39532(13)  | 0.27078(8)   | 0.0288(3)              |
| C4   | 0.3903(2)   | 0.33820(13)  | 0.25287(8)   | 0.0298(4)              |
| C5   | 0.54972(18) | 0.40537(13)  | 0.26112(7)   | 0.0250(3)              |
| C6   | 0.65640(18) | 0.29654(13)  | 0.41080(7)   | 0.0263(3)              |
| C7   | 0.72574(19) | 0.20745(14)  | 0.38061(8)   | 0.0299(3)              |
| C8   | 0.7036(2)   | 0.10657(13)  | 0.40766(8)   | 0.0311(3)              |
| C9   | 0.6138(2)   | 0.09313(14)  | 0.46483(8)   | 0.0306(4)              |
| C10  | 0.5462(2)   | 0.18369(15)  | 0.49450(8)   | 0.0345(4)              |
| C11  | 0.5661(2)   | 0.28515(15)  | 0.46801(8)   | 0.0335(4)              |
| C12  | 0.5904(2)   | -0.01704(15) | 0.49339(9)   | 0.0398(4)              |
| C13  | 0.3816(2)   | 0.62633(12)  | 0.32359(8)   | 0.0280(3)              |
| C14  | 0.2591(2)   | 0.69410(12)  | 0.36123(7)   | 0.0256(3)              |
| C15  | 0.3085(2)   | 0.74481(13)  | 0.41800(8)   | 0.0314(3)              |
| C16  | 0.1976(3)   | 0.80578(14)  | 0.45431(8)   | 0.0406(4)              |
| C17  | 0.0345(3)   | 0.81629(16)  | 0.43391(10)  | 0.0440(5)              |
| C18  | -0.0175(2)  | 0.76574(15)  | 0.37735(10)  | 0.0421(4)              |
| C19  | 0.0942(2)   | 0.70523(14)  | 0.34111(8)   | 0.0334(4)              |
| C20  | 0.58273(19) | 0.48476(14)  | 0.20513(7)   | 0.0277(3)              |
| C21  | 0.76531(19) | 0.50419(14)  | 0.18764(8)   | 0.0288(3)              |
| C22  | 0.7841(2)   | 0.57317(15)  | 0.12763(8)   | 0.0371(4)              |
| N1   | 0.54971(16) | 0.45821(10)  | 0.32641(6)   | 0.0249(3)              |
| O1   | 0.84647(13) | 0.41757(10)  | 0.34275(6)   | 0.0366(3)              |
| O2   | 0.68169(16) | 0.50106(10)  | 0.43140(6)   | 0.0383(3)              |
| O3   | 0.19728(14) | 0.47678(10)  | 0.22318(5)   | 0.0332(3)              |
| O4   | 0.85595(16) | 0.55886(11)  | 0.23798(6)   | 0.0425(3)              |
| S1   | 0.69268(5)  | 0.42613(3)   | 0.378701(19) | 0.02777(11)            |

$U_{eq} = \frac{1}{3}[U_{11}(aa^*)^2 + U_{22}(bb^*)^2 + U_{33}(cc^*)^2 + 2U_{12}aa^*bb^*\cos\gamma + 2U_{13}aa^*cc^*\cos\beta + 2U_{23}bb^*cc^*\cos\alpha]$

**Table 3. Positional Parameters for Hydrogens in Compound (R,R,S,R)-17**

| Atom | x       | y       | z      | U <sub>iso</sub> , Å <sup>2</sup> |
|------|---------|---------|--------|-----------------------------------|
| H1   | 0.4076  | 0.5176  | 0.3978 | 0.031                             |
| H2a  | 0.2450  | 0.3807  | 0.3698 | 0.035                             |
| H2b  | 0.1428  | 0.4820  | 0.3486 | 0.035                             |
| H3   | 0.1374  | 0.3431  | 0.2695 | 0.038                             |
| H4a  | 0.3829  | 0.3152  | 0.2079 | 0.040                             |
| H4b  | 0.4002  | 0.2741  | 0.2794 | 0.040                             |
| H5   | 0.6429  | 0.3545  | 0.2611 | 0.033                             |
| H7   | 0.7866  | 0.2154  | 0.3425 | 0.040                             |
| H8   | 0.7496  | 0.0469  | 0.3873 | 0.041                             |
| H10  | 0.4864  | 0.1759  | 0.5329 | 0.046                             |
| H11  | 0.5197  | 0.3449  | 0.4882 | 0.045                             |
| H12a | 0.6900  | -0.0381 | 0.5159 | 0.060                             |
| H12b | 0.5677  | -0.0675 | 0.4592 | 0.060                             |
| H12c | 0.4986  | -0.0159 | 0.5233 | 0.060                             |
| H13a | 0.4905  | 0.6601  | 0.3252 | 0.037                             |
| H13b | 0.3471  | 0.6232  | 0.2785 | 0.037                             |
| H15  | 0.4181  | 0.7378  | 0.4320 | 0.042                             |
| H16  | 0.2330  | 0.8394  | 0.4922 | 0.054                             |
| H17  | -0.0404 | 0.8571  | 0.4580 | 0.058                             |
| H18  | -0.1274 | 0.7724  | 0.3637 | 0.056                             |
| H19  | 0.0588  | 0.6719  | 0.3031 | 0.044                             |
| H20a | 0.5258  | 0.4585  | 0.1667 | 0.037                             |
| H20b | 0.5329  | 0.5533  | 0.2165 | 0.037                             |
| H21  | 0.8187  | 0.4346  | 0.1796 | 0.038                             |
| H22a | 0.7318  | 0.6415  | 0.1348 | 0.056                             |
| H22b | 0.7321  | 0.5381  | 0.0914 | 0.056                             |
| H22c | 0.9003  | 0.5837  | 0.1186 | 0.056                             |
| H3a  | 0.1015  | 0.4988  | 0.2271 | 0.050                             |
| H4   | 0.8527  | 0.5232  | 0.2714 | 0.064                             |

**Table 4. Refined Thermal Parameters (U's) for Compound (R,R,S,R)-17**

| Atom | U <sub>11</sub> | U <sub>22</sub> | U <sub>33</sub> | U <sub>23</sub> | U <sub>13</sub> | U <sub>12</sub> |
|------|-----------------|-----------------|-----------------|-----------------|-----------------|-----------------|
| C1   | 0.0227(7)       | 0.0246(8)       | 0.0235(7)       | -0.0006(6)      | 0.0021(6)       | 0.0002(6)       |
| C2   | 0.0213(7)       | 0.0258(8)       | 0.0310(8)       | 0.0010(7)       | 0.0043(6)       | -0.0014(6)      |
| C3   | 0.0213(7)       | 0.0300(8)       | 0.0353(8)       | -0.0022(7)      | -0.0004(6)      | -0.0063(6)      |
| C4   | 0.0265(8)       | 0.0291(8)       | 0.0340(8)       | -0.0069(6)      | 0.0010(7)       | -0.0034(7)      |
| C5   | 0.0208(7)       | 0.0275(8)       | 0.0267(7)       | -0.0049(6)      | 0.0013(6)       | 0.0011(6)       |
| C6   | 0.0219(8)       | 0.0313(8)       | 0.0255(7)       | 0.0019(6)       | -0.0038(6)      | -0.0009(6)      |
| C7   | 0.0286(8)       | 0.0379(8)       | 0.0230(7)       | -0.0009(7)      | 0.0010(6)       | 0.0017(7)       |
| C8   | 0.0320(8)       | 0.0332(8)       | 0.0280(8)       | -0.0034(7)      | -0.0016(7)      | 0.0028(7)       |
| C9   | 0.0231(8)       | 0.0376(9)       | 0.0310(8)       | 0.0047(7)       | -0.0055(6)      | -0.0011(7)      |
| C10  | 0.0315(9)       | 0.0420(10)      | 0.0302(8)       | 0.0051(8)       | 0.0063(7)       | 0.0020(7)       |
| C11  | 0.0290(8)       | 0.0397(9)       | 0.0318(8)       | -0.0044(7)      | 0.0023(7)       | 0.0055(7)       |
| C12  | 0.0409(10)      | 0.0383(10)      | 0.0402(9)       | 0.0087(8)       | -0.0028(8)      | -0.0013(8)      |
| C13  | 0.0283(8)       | 0.0242(8)       | 0.0315(8)       | -0.0008(6)      | 0.0046(7)       | -0.0017(6)      |
| C14  | 0.0296(8)       | 0.0191(7)       | 0.0280(8)       | 0.0028(6)       | 0.0030(6)       | -0.0005(6)      |
| C15  | 0.0359(9)       | 0.0271(8)       | 0.0314(8)       | 0.0012(6)       | -0.0009(7)      | -0.0002(7)      |
| C16  | 0.0619(12)      | 0.0291(8)       | 0.0307(9)       | -0.0024(7)      | 0.0061(9)       | 0.0033(9)       |
| C17  | 0.0527(12)      | 0.0359(10)      | 0.0432(10)      | 0.0072(8)       | 0.0215(9)       | 0.0153(9)       |
| C18  | 0.0322(9)       | 0.0433(10)      | 0.0507(11)      | 0.0124(9)       | 0.0058(9)       | 0.0089(8)       |
| C19  | 0.0326(9)       | 0.0325(9)       | 0.0351(8)       | 0.0026(7)       | -0.0021(7)      | 0.0000(7)       |
| C20  | 0.0224(8)       | 0.0342(9)       | 0.0265(7)       | -0.0019(7)      | 0.0009(6)       | 0.0017(7)       |
| C21  | 0.0224(8)       | 0.0340(8)       | 0.0300(8)       | -0.0024(7)      | 0.0014(6)       | -0.0018(7)      |
| C22  | 0.0326(9)       | 0.0451(10)      | 0.0336(8)       | 0.0010(8)       | 0.0047(7)       | -0.0043(8)      |
| N1   | 0.0211(6)       | 0.0282(7)       | 0.0254(7)       | -0.0012(5)      | -0.0010(5)      | 0.0026(5)       |
| O1   | 0.0186(5)       | 0.0446(7)       | 0.0466(7)       | 0.0102(6)       | -0.0023(5)      | -0.0025(5)      |
| O2   | 0.0409(7)       | 0.0347(6)       | 0.0392(6)       | -0.0081(5)      | -0.0142(6)      | -0.0039(6)      |
| O3   | 0.0236(5)       | 0.0445(7)       | 0.0313(6)       | 0.0013(5)       | -0.0020(5)      | 0.0004(5)       |
| O4   | 0.0378(7)       | 0.0567(8)       | 0.0330(6)       | 0.0046(6)       | -0.0049(5)      | -0.0195(6)      |
| S1   | 0.02176(18)     | 0.0300(2)       | 0.0315(2)       | 0.00057(16)     | -0.00505(15)    | -0.00247(15)    |

The form of the anisotropic displacement parameter is:

$$\exp[-2\pi^2(a^*U_{11}h^2+b^*U_{22}k^2+c^*U_{33}l^2+2b^*c^*U_{23}kl+2a^*c^*U_{13}hl+2a^*b^*U_{12}hk)]$$

**Table 5. Bond Distances in Compound (R,R,S,R)-17, Å**

|         |            |         |            |         |            |
|---------|------------|---------|------------|---------|------------|
| C1-N1   | 1.4895(19) | C1-C2   | 1.527(2)   | C1-C13  | 1.546(2)   |
| C2-C3   | 1.522(2)   | C3-O3   | 1.432(2)   | C3-C4   | 1.524(2)   |
| C4-C5   | 1.538(2)   | C5-N1   | 1.4964(19) | C5-C20  | 1.541(2)   |
| C6-C7   | 1.387(2)   | C6-C11  | 1.390(2)   | C6-S1   | 1.7669(16) |
| C7-C8   | 1.385(2)   | C8-C9   | 1.390(2)   | C9-C10  | 1.392(3)   |
| C9-C12  | 1.503(2)   | C10-C11 | 1.385(3)   | C13-C14 | 1.510(2)   |
| C14-C15 | 1.386(2)   | C14-C19 | 1.393(2)   | C15-C16 | 1.388(2)   |
| C16-C17 | 1.381(3)   | C17-C18 | 1.387(3)   | C18-C19 | 1.388(3)   |
| C20-C21 | 1.528(2)   | C21-O4  | 1.437(2)   | C21-C22 | 1.512(2)   |
| N1-S1   | 1.6230(13) | O1-S1   | 1.4431(12) | O2-S1   | 1.4332(12) |

**Table 6. Bond Angles in Compound (R,R,S,R)-17, °**

|             |            |             |            |             |            |
|-------------|------------|-------------|------------|-------------|------------|
| N1-C1-C2    | 111.48(12) | N1-C1-C13   | 110.22(12) | C2-C1-C13   | 115.11(13) |
| C3-C2-C1    | 114.13(12) | O3-C3-C2    | 112.78(13) | O3-C3-C4    | 108.34(13) |
| C2-C3-C4    | 109.62(13) | C3-C4-C5    | 115.32(12) | N1-C5-C4    | 109.76(12) |
| N1-C5-C20   | 112.96(12) | C4-C5-C20   | 114.14(13) | C7-C6-C11   | 120.48(15) |
| C7-C6-S1    | 119.71(12) | C11-C6-S1   | 119.72(13) | C8-C7-C6    | 119.53(14) |
| C7-C8-C9    | 121.06(15) | C8-C9-C10   | 118.44(15) | C8-C9-C12   | 120.36(16) |
| C10-C9-C12  | 121.21(15) | C11-C10-C9  | 121.37(15) | C10-C11-C6  | 119.13(17) |
| C14-C13-C1  | 112.32(12) | C15-C14-C19 | 118.50(16) | C15-C14-C13 | 120.05(15) |
| C19-C14-C13 | 121.43(15) | C14-C15-C16 | 121.31(17) | C17-C16-C15 | 119.71(17) |
| C16-C17-C18 | 119.80(17) | C17-C18-C19 | 120.20(18) | C18-C19-C14 | 120.48(17) |
| C21-C20-C5  | 116.26(13) | O4-C21-C22  | 105.66(13) | O4-C21-C20  | 112.97(13) |
| C22-C21-C20 | 112.20(14) | C1-N1-C5    | 119.61(12) | C1-N1-S1    | 118.37(10) |
| C5-N1-S1    | 119.18(10) | O2-S1-O1    | 119.26(8)  | O2-S1-N1    | 107.37(7)  |
| O1-S1-N1    | 106.41(7)  | O2-S1-C6    | 107.49(7)  | O1-S1-C6    | 105.39(7)  |
| N1-S1-C6    | 110.86(7)  |             |            |             |            |



**X-ray Structure Determination of Compound (S,R,S,R)-17**

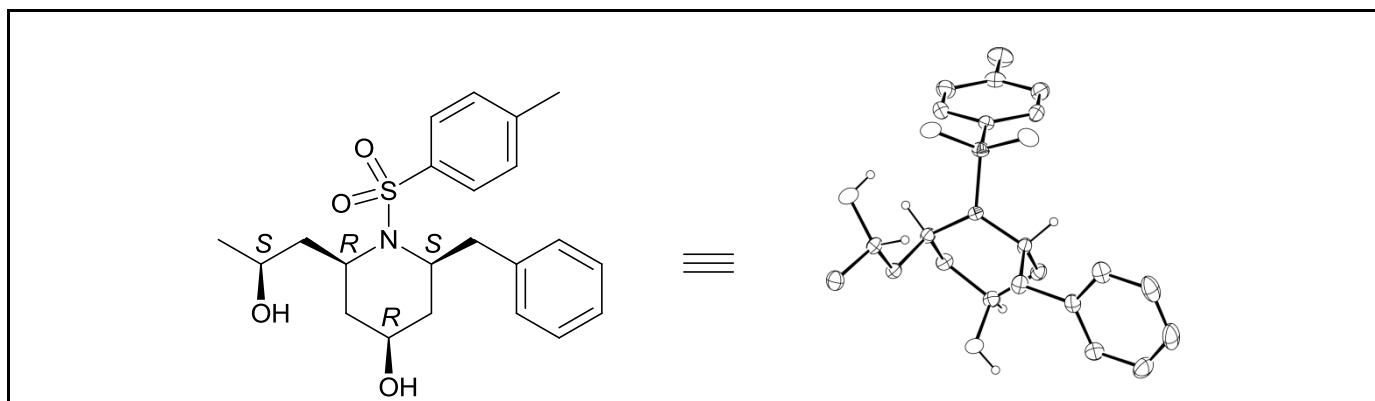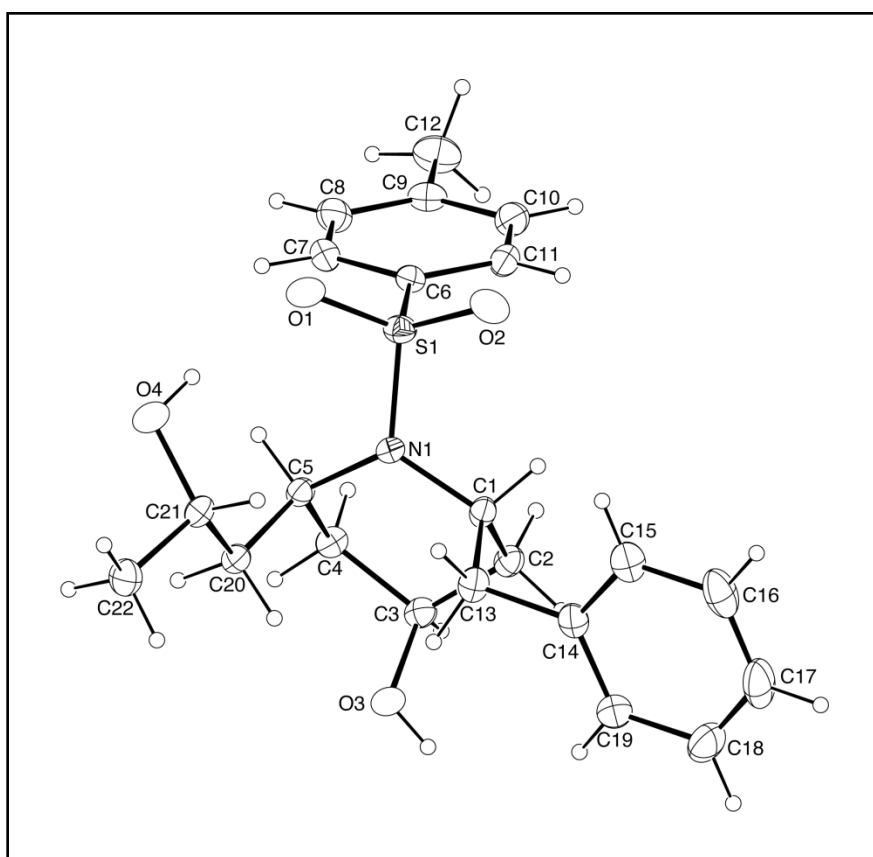

Figure 1. ORTEP drawing of the title compound with 30% probability thermal ellipsoids.

**Table 1. Summary of Structure Determination of Compound (S,R,S,R)-17**

|                                   |                                                  |
|-----------------------------------|--------------------------------------------------|
| Empirical formula                 | C <sub>22</sub> H <sub>29</sub> NSO <sub>4</sub> |
| Formula weight                    | 403.52                                           |
| Temperature                       | 143(1) K                                         |
| Wavelength                        | 0.71073 Å                                        |
| Crystal system                    | orthorhombic                                     |
| Space group                       | P2 <sub>1</sub> 2 <sub>1</sub> 2 <sub>1</sub>    |
| Cell constants:                   |                                                  |
| a                                 | 8.2223(5) Å                                      |
| b                                 | 13.0939(8) Å                                     |
| c                                 | 19.2454(12) Å                                    |
| Volume                            | 2072.0(2) Å <sup>3</sup>                         |
| Z                                 | 4                                                |
| Density (calculated)              | 1.294 Mg/m <sup>3</sup>                          |
| Absorption coefficient            | 0.184 mm <sup>-1</sup>                           |
| F(000)                            | 864                                              |
| Crystal size                      | 0.38 x 0.10 x 0.08 mm <sup>3</sup>               |
| Theta range for data collection   | 2.63 to 25.02°.                                  |
| Index ranges                      | -9 ≤ h ≤ 9, -15 ≤ k ≤ 13, -20 ≤ l ≤ 22           |
| Reflections collected             | 24575                                            |
| Independent reflections           | 3651 [R(int) = 0.0309]                           |
| Completeness to theta = 25.02°    | 99.9 %                                           |
| Absorption correction             | Semi-empirical from equivalents                  |
| Max. and min. transmission        | 1.0000 and 0.8933                                |
| Refinement method                 | Full-matrix least-squares on F <sup>2</sup>      |
| Data / restraints / parameters    | 3651 / 0 / 258                                   |
| Goodness-of-fit on F <sup>2</sup> | 1.061                                            |
| Final R indices [I > 2σ(I)]       | R1 = 0.0358, wR2 = 0.0892                        |
| R indices (all data)              | R1 = 0.0378, wR2 = 0.0915                        |
| Absolute structure parameter      | 0.01(7)                                          |
| Largest diff. peak and hole       | 0.157 and -0.298 e.Å <sup>-3</sup>               |

**Table 2. Refined Positional Parameters for Compound (S,R,S,R)-17**

| Atom | x           | y           | z           | $U_{eq}, \text{\AA}^2$ |
|------|-------------|-------------|-------------|------------------------|
| C1   | 0.5985(2)   | 0.49849(14) | 0.35228(10) | 0.0273(4)              |
| C2   | 0.7377(2)   | 0.57286(15) | 0.34002(10) | 0.0295(4)              |
| C3   | 0.7348(2)   | 0.62493(15) | 0.26871(10) | 0.0296(4)              |
| C4   | 0.5688(2)   | 0.67130(14) | 0.25486(10) | 0.0289(4)              |
| C5   | 0.4237(2)   | 0.59894(14) | 0.26500(9)  | 0.0270(4)              |
| C6   | 0.3341(2)   | 0.70066(15) | 0.41785(9)  | 0.0274(4)              |
| C7   | 0.2512(2)   | 0.77667(16) | 0.38252(10) | 0.0349(5)              |
| C8   | 0.2715(3)   | 0.87794(16) | 0.40239(11) | 0.0397(5)              |
| C9   | 0.3703(3)   | 0.90403(16) | 0.45778(11) | 0.0357(5)              |
| C10  | 0.4499(3)   | 0.82638(16) | 0.49328(11) | 0.0382(5)              |
| C11  | 0.4335(3)   | 0.72473(17) | 0.47390(10) | 0.0346(5)              |
| C12  | 0.3931(4)   | 1.01442(18) | 0.47872(13) | 0.0516(6)              |
| C13  | 0.6183(3)   | 0.39310(14) | 0.31727(11) | 0.0323(4)              |
| C14  | 0.7394(3)   | 0.32593(14) | 0.35380(10) | 0.0319(5)              |
| C15  | 0.6913(3)   | 0.26918(15) | 0.41127(11) | 0.0414(5)              |
| C16  | 0.8006(4)   | 0.20659(17) | 0.44617(12) | 0.0543(7)              |
| C17  | 0.9581(4)   | 0.2000(2)   | 0.42364(15) | 0.0643(9)              |
| C18  | 1.0089(3)   | 0.2562(2)   | 0.36703(14) | 0.0618(8)              |
| C19  | 0.9004(3)   | 0.31852(19) | 0.33230(12) | 0.0433(5)              |
| C20  | 0.3934(2)   | 0.52806(16) | 0.20314(10) | 0.0291(4)              |
| C21  | 0.2467(2)   | 0.45744(16) | 0.20918(10) | 0.0328(4)              |
| C22  | 0.2138(3)   | 0.40150(17) | 0.14241(11) | 0.0404(5)              |
| N1   | 0.43922(19) | 0.54411(12) | 0.33261(7)  | 0.0261(3)              |
| O1   | 0.14971(17) | 0.56620(13) | 0.36269(7)  | 0.0406(4)              |
| O2   | 0.34473(19) | 0.50877(11) | 0.45221(7)  | 0.0397(4)              |
| O3   | 0.77160(16) | 0.55680(11) | 0.21283(7)  | 0.0349(3)              |
| O4   | 0.10194(17) | 0.51288(15) | 0.22670(8)  | 0.0474(4)              |
| S1   | 0.30947(6)  | 0.57162(4)  | 0.39335(2)  | 0.02975(14)            |

$U_{eq} = \frac{1}{3}[U_{11}(aa^*)^2 + U_{22}(bb^*)^2 + U_{33}(cc^*)^2 + 2U_{12}aa^*bb^*\cos\gamma + 2U_{13}aa^*cc^*\cos\beta + 2U_{23}bb^*cc^*\cos\alpha]$

**Table 3. Positional Parameters for Hydrogens in Compound (S,R,S,R)-17**

| Atom | x      | y      | z      | $U_{iso}, \text{\AA}^2$ |
|------|--------|--------|--------|-------------------------|
| H1   | 0.5942 | 0.4861 | 0.4025 | 0.036                   |
| H2a  | 0.8397 | 0.5364 | 0.3449 | 0.039                   |
| H2b  | 0.7344 | 0.6251 | 0.3757 | 0.039                   |
| H3   | 0.8156 | 0.6799 | 0.2687 | 0.039                   |
| H4a  | 0.5669 | 0.6964 | 0.2075 | 0.038                   |
| H4b  | 0.5548 | 0.7296 | 0.2854 | 0.038                   |
| H5   | 0.3271 | 0.6424 | 0.2690 | 0.036                   |
| H7   | 0.1825 | 0.7601 | 0.3458 | 0.046                   |
| H8   | 0.2177 | 0.9291 | 0.3780 | 0.053                   |
| H10  | 0.5157 | 0.8428 | 0.5309 | 0.051                   |
| H11  | 0.4881 | 0.6736 | 0.4980 | 0.046                   |
| H12a | 0.3417 | 1.0261 | 0.5228 | 0.077                   |
| H12b | 0.3450 | 1.0580 | 0.4443 | 0.077                   |
| H12c | 0.5071 | 1.0292 | 0.4824 | 0.077                   |
| H13a | 0.5136 | 0.3589 | 0.3164 | 0.043                   |
| H13b | 0.6530 | 0.4029 | 0.2696 | 0.043                   |
| H15  | 0.5842 | 0.2732 | 0.4266 | 0.055                   |
| H16  | 0.7669 | 0.1693 | 0.4847 | 0.072                   |
| H17  | 1.0312 | 0.1575 | 0.4466 | 0.086                   |
| H18  | 1.1163 | 0.2521 | 0.3522 | 0.082                   |
| H19  | 0.9355 | 0.3560 | 0.2941 | 0.058                   |
| H20a | 0.3800 | 0.5698 | 0.1619 | 0.039                   |
| H20b | 0.4896 | 0.4864 | 0.1963 | 0.039                   |
| H21  | 0.2682 | 0.4072 | 0.2458 | 0.044                   |
| H22a | 0.1205 | 0.3582 | 0.1482 | 0.061                   |
| H22b | 0.3066 | 0.3607 | 0.1304 | 0.061                   |
| H22c | 0.1931 | 0.4500 | 0.1060 | 0.061                   |
| H3a  | 0.8696 | 0.5453 | 0.2122 | 0.052                   |
| H4   | 0.1113 | 0.5371 | 0.2658 | 0.071                   |

**Table 4. Refined Thermal Parameters (U's) for Compound (S,R,S,R)-17**

| Atom | U <sub>11</sub> | U <sub>22</sub> | U <sub>33</sub> | U <sub>23</sub> | U <sub>13</sub> | U <sub>12</sub> |
|------|-----------------|-----------------|-----------------|-----------------|-----------------|-----------------|
| C1   | 0.0247(10)      | 0.0282(9)       | 0.0289(9)       | -0.0009(8)      | -0.0049(8)      | 0.0021(8)       |
| C2   | 0.0253(10)      | 0.0297(9)       | 0.0335(9)       | -0.0040(8)      | -0.0032(7)      | -0.0013(8)      |
| C3   | 0.0256(10)      | 0.0292(9)       | 0.0340(10)      | -0.0043(8)      | 0.0002(8)       | -0.0034(8)      |
| C4   | 0.0289(10)      | 0.0239(9)       | 0.0340(10)      | 0.0034(8)       | 0.0019(8)       | -0.0004(8)      |
| C5   | 0.0245(10)      | 0.0279(10)      | 0.0287(9)       | 0.0026(8)       | 0.0001(8)       | 0.0038(8)       |
| C6   | 0.0266(10)      | 0.0321(9)       | 0.0235(9)       | -0.0010(7)      | 0.0026(7)       | 0.0006(8)       |
| C7   | 0.0368(11)      | 0.0408(11)      | 0.0271(10)      | 0.0001(8)       | -0.0021(9)      | 0.0047(9)       |
| C8   | 0.0484(13)      | 0.0367(10)      | 0.0341(11)      | 0.0054(9)       | 0.0035(9)       | 0.0081(10)      |
| C9   | 0.0355(11)      | 0.0340(11)      | 0.0375(10)      | -0.0036(9)      | 0.0107(9)       | -0.0023(9)      |
| C10  | 0.0333(11)      | 0.0409(11)      | 0.0403(11)      | -0.0125(10)     | -0.0042(9)      | 0.0001(10)      |
| C11  | 0.0288(10)      | 0.0399(11)      | 0.0350(10)      | -0.0034(9)      | -0.0045(8)      | 0.0065(9)       |
| C12  | 0.0636(16)      | 0.0365(12)      | 0.0548(14)      | -0.0071(11)     | 0.0132(12)      | -0.0033(11)     |
| C13  | 0.0347(11)      | 0.0249(9)       | 0.0373(10)      | -0.0021(8)      | -0.0065(9)      | 0.0010(8)       |
| C14  | 0.0408(12)      | 0.0242(9)       | 0.0308(10)      | -0.0044(8)      | -0.0063(8)      | 0.0037(8)       |
| C15  | 0.0516(13)      | 0.0321(10)      | 0.0406(11)      | -0.0007(9)      | -0.0065(10)     | 0.0000(11)      |
| C16  | 0.089(2)        | 0.0348(11)      | 0.0393(12)      | 0.0027(10)      | -0.0168(14)     | 0.0072(14)      |
| C17  | 0.089(2)        | 0.0520(15)      | 0.0521(15)      | -0.0101(12)     | -0.0303(15)     | 0.0363(16)      |
| C18  | 0.0516(16)      | 0.0721(18)      | 0.0618(17)      | -0.0185(15)     | -0.0118(13)     | 0.0305(14)      |
| C19  | 0.0424(13)      | 0.0487(13)      | 0.0387(12)      | -0.0040(10)     | 0.0003(10)      | 0.0109(11)      |
| C20  | 0.0245(9)       | 0.0336(10)      | 0.0292(9)       | 0.0021(8)       | 0.0005(8)       | 0.0021(8)       |
| C21  | 0.0217(10)      | 0.0418(11)      | 0.0351(10)      | -0.0004(8)      | -0.0021(8)      | 0.0008(8)       |
| C22  | 0.0357(12)      | 0.0466(12)      | 0.0389(11)      | -0.0041(10)     | -0.0060(9)      | -0.0046(10)     |
| N1   | 0.0220(8)       | 0.0306(8)       | 0.0256(8)       | -0.0004(6)      | 0.0021(6)       | 0.0031(7)       |
| O1   | 0.0237(7)       | 0.0529(9)       | 0.0452(8)       | -0.0161(7)      | 0.0048(6)       | -0.0070(7)      |
| O2   | 0.0517(10)      | 0.0341(7)       | 0.0332(7)       | 0.0064(6)       | 0.0097(7)       | -0.0029(7)      |
| O3   | 0.0236(7)       | 0.0437(8)       | 0.0373(7)       | -0.0093(6)      | 0.0023(6)       | -0.0001(6)      |
| O4   | 0.0230(7)       | 0.0714(11)      | 0.0479(9)       | -0.0194(9)      | -0.0013(7)      | 0.0045(7)       |
| S1   | 0.0272(2)       | 0.0322(2)       | 0.0299(2)       | -0.0025(2)      | 0.00476(19)     | -0.0030(2)      |

The form of the anisotropic displacement parameter is:

$$\exp[-2\pi^2(a^*U_{11}h^2+b^*U_{22}k^2+c^*U_{33}l^2+2b^*c^*U_{23}kl+2a^*c^*U_{13}hl+2a^*b^*U_{12}hk)]$$

**Table 5. Bond Distances in Compound (S,R,S,R)-17, Å**

|         |            |         |            |         |            |
|---------|------------|---------|------------|---------|------------|
| C1-N1   | 1.488(2)   | C1-C2   | 1.522(3)   | C1-C13  | 1.544(3)   |
| C2-C3   | 1.533(3)   | C3-O3   | 1.430(2)   | C3-C4   | 1.517(3)   |
| C4-C5   | 1.536(3)   | C5-N1   | 1.492(2)   | C5-C20  | 1.530(3)   |
| C6-C7   | 1.385(3)   | C6-C11  | 1.389(3)   | C6-S1   | 1.7658(19) |
| C7-C8   | 1.390(3)   | C8-C9   | 1.383(3)   | C9-C10  | 1.389(3)   |
| C9-C12  | 1.512(3)   | C10-C11 | 1.389(3)   | C13-C14 | 1.503(3)   |
| C14-C15 | 1.390(3)   | C14-C19 | 1.391(3)   | C15-C16 | 1.390(3)   |
| C16-C17 | 1.369(4)   | C17-C18 | 1.379(4)   | C18-C19 | 1.381(3)   |
| C20-C21 | 1.524(3)   | C21-O4  | 1.435(2)   | C21-C22 | 1.504(3)   |
| N1-S1   | 1.6231(15) | O1-S1   | 1.4417(15) | O2-S1   | 1.4299(15) |

**Table 6. Bond Angles in Compound (S,R,S,R)-17, °**

|             |            |             |            |             |            |
|-------------|------------|-------------|------------|-------------|------------|
| N1-C1-C2    | 111.46(15) | N1-C1-C13   | 109.92(15) | C2-C1-C13   | 115.14(16) |
| C1-C2-C3    | 114.31(15) | O3-C3-C4    | 107.95(15) | O3-C3-C2    | 113.12(16) |
| C4-C3-C2    | 110.46(15) | C3-C4-C5    | 115.44(15) | N1-C5-C20   | 113.62(15) |
| N1-C5-C4    | 109.95(15) | C20-C5-C4   | 113.68(15) | C7-C6-C11   | 120.50(19) |
| C7-C6-S1    | 120.01(15) | C11-C6-S1   | 119.46(15) | C6-C7-C8    | 119.43(18) |
| C9-C8-C7    | 121.21(19) | C8-C9-C10   | 118.36(19) | C8-C9-C12   | 120.9(2)   |
| C10-C9-C12  | 120.7(2)   | C11-C10-C9  | 121.60(19) | C10-C11-C6  | 118.9(2)   |
| C14-C13-C1  | 112.88(16) | C15-C14-C19 | 118.1(2)   | C15-C14-C13 | 119.8(2)   |
| C19-C14-C13 | 122.2(2)   | C16-C15-C14 | 121.1(2)   | C17-C16-C15 | 119.8(2)   |
| C16-C17-C18 | 120.2(2)   | C17-C18-C19 | 120.2(3)   | C18-C19-C14 | 120.8(2)   |
| C21-C20-C5  | 115.94(16) | O4-C21-C22  | 107.32(16) | O4-C21-C20  | 111.57(17) |
| C22-C21-C20 | 111.91(17) | C1-N1-C5    | 119.37(14) | C1-N1-S1    | 118.97(12) |
| C5-N1-S1    | 117.71(12) | O2-S1-O1    | 118.72(10) | O2-S1-N1    | 108.03(9)  |
| O1-S1-N1    | 107.05(8)  | O2-S1-C6    | 108.42(9)  | O1-S1-C6    | 105.13(9)  |
| N1-S1-C6    | 109.23(9)  |             |            |             |            |

X-ray Structure Determination of Compound (*S,S,S,R*)-17

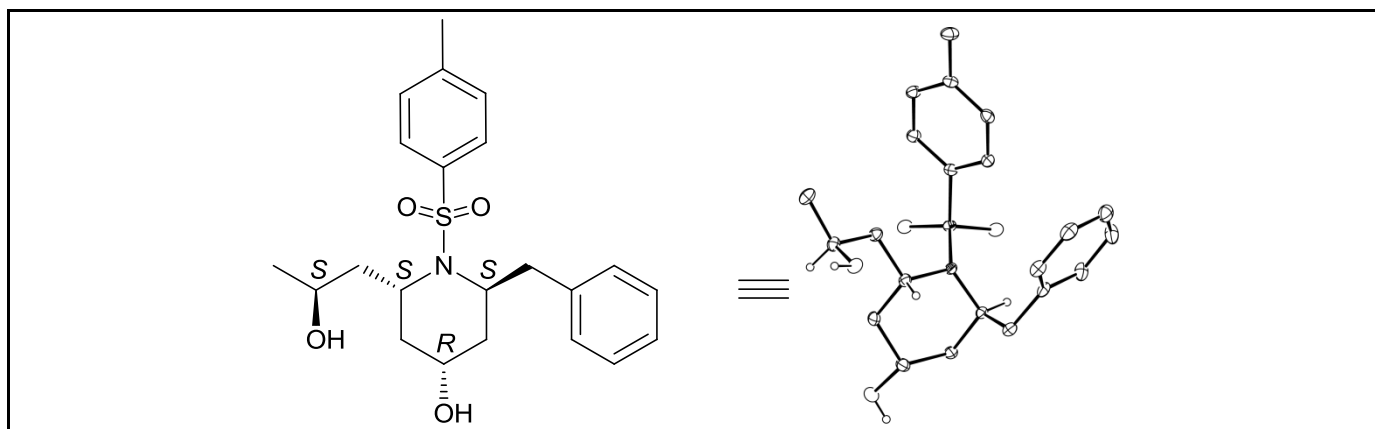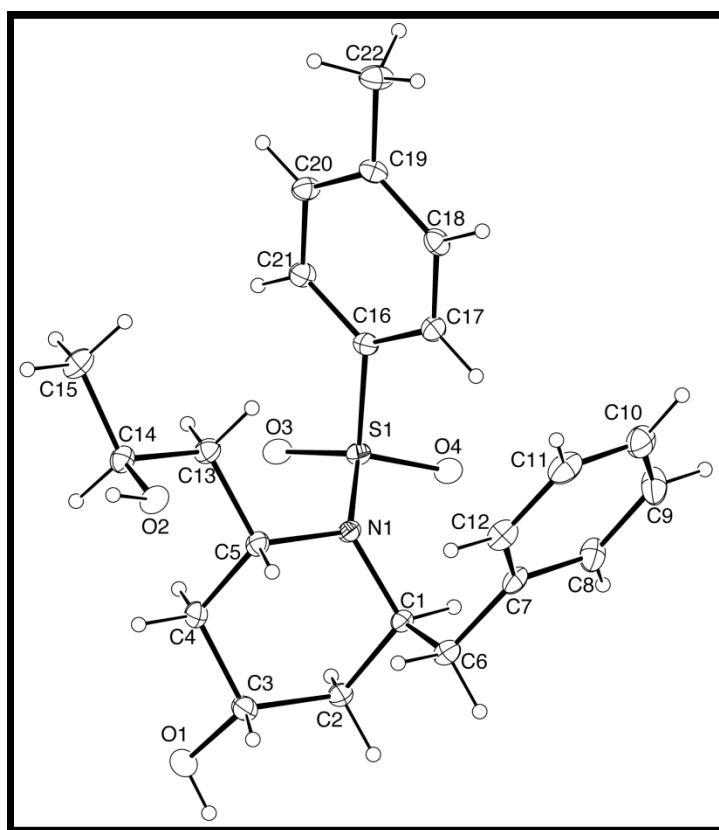

Figure 1. ORTEP drawing of the title compound with 30% probability thermal ellipsoids.

**Table 1. Summary of Structure Determination of Compound (S,S,S,R)-17**

|                                   |                                                  |
|-----------------------------------|--------------------------------------------------|
| Empirical formula                 | C <sub>22</sub> H <sub>29</sub> NSO <sub>4</sub> |
| Formula weight                    | 403.52                                           |
| Temperature                       | 100(1) K                                         |
| Wavelength                        | 0.71073 Å                                        |
| Crystal system                    | orthorhombic                                     |
| Space group                       | P2 <sub>1</sub> 2 <sub>1</sub> 2 <sub>1</sub>    |
| Cell constants:                   |                                                  |
| a                                 | 13.8629(4) Å                                     |
| b                                 | 16.9650(4) Å                                     |
| c                                 | 17.9277(4) Å                                     |
| Volume                            | 4216.31(18) Å <sup>3</sup>                       |
| Z                                 | 8                                                |
| Density (calculated)              | 1.271 Mg/m <sup>3</sup>                          |
| Absorption coefficient            | 0.181 mm <sup>-1</sup>                           |
| F(000)                            | 1728                                             |
| Crystal size                      | 0.35 x 0.18 x 0.06 mm <sup>3</sup>               |
| Theta range for data collection   | 1.65 to 27.55°                                   |
| Index ranges                      | -18 ≤ h ≤ 18, -22 ≤ k ≤ 21, -23 ≤ l ≤ 23         |
| Reflections collected             | 87053                                            |
| Independent reflections           | 9722 [R(int) = 0.0324]                           |
| Completeness to theta = 27.55°    | 99.9 %                                           |
| Absorption correction             | Semi-empirical from equivalents                  |
| Max. and min. transmission        | 0.7456 and 0.7022                                |
| Refinement method                 | Full-matrix least-squares on F <sup>2</sup>      |
| Data / restraints / parameters    | 9722 / 0 / 514                                   |
| Goodness-of-fit on F <sup>2</sup> | 1.006                                            |
| Final R indices [I > 2σ(I)]       | R1 = 0.0290, wR2 = 0.0754                        |
| R indices (all data)              | R1 = 0.0333, wR2 = 0.0779                        |
| Absolute structure parameter      | -0.03(3)                                         |
| Largest diff. peak and hole       | 0.299 and -0.224 e.Å <sup>-3</sup>               |



**Table 2. Refined Positional Parameters for Compound (S,S,S,R)-17**

| Atom | x            | y           | z            | $U_{eq}, \text{\AA}^2$ |
|------|--------------|-------------|--------------|------------------------|
| C1   | 0.37810(10)  | 0.19794(8)  | 0.65331(7)   | 0.0193(3)              |
| C2   | 0.48323(10)  | 0.22569(9)  | 0.64604(8)   | 0.0223(3)              |
| C3   | 0.50741(10)  | 0.26044(10) | 0.56978(8)   | 0.0257(3)              |
| C4   | 0.43396(10)  | 0.32256(9)  | 0.54766(8)   | 0.0251(3)              |
| C5   | 0.33030(10)  | 0.29248(8)  | 0.55259(7)   | 0.0205(3)              |
| C6   | 0.35435(11)  | 0.12034(9)  | 0.61372(8)   | 0.0247(3)              |
| C7   | 0.25344(11)  | 0.09292(8)  | 0.63142(8)   | 0.0247(3)              |
| C8   | 0.22771(12)  | 0.07751(10) | 0.70521(9)   | 0.0313(3)              |
| C9   | 0.13477(13)  | 0.05558(11) | 0.72385(10)  | 0.0380(4)              |
| C10  | 0.06504(13)  | 0.04726(10) | 0.66883(10)  | 0.0362(4)              |
| C11  | 0.09035(13)  | 0.06090(10) | 0.59509(11)  | 0.0355(4)              |
| C12  | 0.18268(12)  | 0.08461(9)  | 0.57699(9)   | 0.0304(3)              |
| C13  | 0.25580(11)  | 0.35298(9)  | 0.52618(7)   | 0.0235(3)              |
| C14  | 0.26478(11)  | 0.37609(8)  | 0.44463(8)   | 0.0237(3)              |
| C15  | 0.18713(13)  | 0.43538(10) | 0.42377(9)   | 0.0317(3)              |
| C16  | 0.14870(10)  | 0.33778(8)  | 0.67413(7)   | 0.0202(3)              |
| C17  | 0.08613(10)  | 0.27496(9)  | 0.66587(8)   | 0.0233(3)              |
| C18  | -0.01026(10) | 0.29011(9)  | 0.64912(8)   | 0.0241(3)              |
| C19  | -0.04349(10) | 0.36703(9)  | 0.64050(8)   | 0.0236(3)              |
| C20  | 0.02169(11)  | 0.42916(9)  | 0.64915(8)   | 0.0246(3)              |
| C21  | 0.11749(10)  | 0.41504(9)  | 0.66669(8)   | 0.0232(3)              |
| C22  | -0.14747(11) | 0.38373(10) | 0.62179(10)  | 0.0319(3)              |
| N1   | 0.30963(8)   | 0.26113(7)  | 0.62902(6)   | 0.0185(2)              |
| O1   | 0.59866(8)   | 0.29883(7)  | 0.57015(7)   | 0.0342(3)              |
| O2   | 0.25544(8)   | 0.30510(6)  | 0.40144(6)   | 0.0266(2)              |
| O3   | 0.32001(7)   | 0.39588(6)  | 0.69296(6)   | 0.0250(2)              |
| O4   | 0.27585(8)   | 0.27663(6)  | 0.76314(5)   | 0.0268(2)              |
| S1   | 0.27172(2)   | 0.32091(2)  | 0.694394(18) | 0.01900(7)             |

$U_{eq} = \frac{1}{3}[U_{11}(aa^*)^2 + U_{22}(bb^*)^2 + U_{33}(cc^*)^2 + 2U_{12}aa^*bb^*\cos\gamma + 2U_{13}aa^*cc^*\cos\beta + 2U_{23}bb^*cc^*\cos\alpha]$

**Table 3. Positional Parameters for Hydrogens in Compound (S,S,S,R)-17**

| Atom | x       | y      | z      | $U_{iso}, \text{\AA}^2$ |
|------|---------|--------|--------|-------------------------|
| H1   | 0.3664  | 0.1892 | 0.7066 | 0.026                   |
| H2a  | 0.4958  | 0.2651 | 0.6840 | 0.030                   |
| H2b  | 0.5257  | 0.1813 | 0.6555 | 0.030                   |
| H3   | 0.5078  | 0.2183 | 0.5324 | 0.034                   |
| H4a  | 0.4469  | 0.3395 | 0.4970 | 0.033                   |
| H4b  | 0.4411  | 0.3680 | 0.5800 | 0.033                   |
| H5   | 0.3257  | 0.2476 | 0.5184 | 0.027                   |
| H6a  | 0.3607  | 0.1275 | 0.5603 | 0.033                   |
| H6b  | 0.4001  | 0.0803 | 0.6291 | 0.033                   |
| H8   | 0.2739  | 0.0821 | 0.7426 | 0.042                   |
| H9   | 0.1189  | 0.0463 | 0.7735 | 0.051                   |
| H10  | 0.0024  | 0.0328 | 0.6812 | 0.048                   |
| H11  | 0.0448  | 0.0540 | 0.5576 | 0.047                   |
| H12  | 0.1979  | 0.0952 | 0.5275 | 0.040                   |
| H13a | 0.1918  | 0.3316 | 0.5345 | 0.031                   |
| H13b | 0.2620  | 0.4001 | 0.5565 | 0.031                   |
| H14  | 0.3285  | 0.3994 | 0.4359 | 0.032                   |
| H15a | 0.1913  | 0.4470 | 0.3714 | 0.047                   |
| H15b | 0.1963  | 0.4829 | 0.4519 | 0.047                   |
| H15c | 0.1248  | 0.4137 | 0.4348 | 0.047                   |
| H17  | 0.1080  | 0.2235 | 0.6714 | 0.031                   |
| H18  | -0.0530 | 0.2483 | 0.6436 | 0.032                   |
| H20  | 0.0005  | 0.4808 | 0.6430 | 0.033                   |
| H21  | 0.1602  | 0.4567 | 0.6734 | 0.031                   |
| H22a | -0.1791 | 0.4061 | 0.6645 | 0.048                   |
| H22b | -0.1791 | 0.3355 | 0.6081 | 0.048                   |
| H22c | -0.1505 | 0.4202 | 0.5809 | 0.048                   |
| H1a  | 0.6401  | 0.2681 | 0.5848 | 0.051                   |
| H2   | 0.2483  | 0.3165 | 0.3573 | 0.040                   |

**Table 4. Refined Thermal Parameters (U's) for Compound (S,S,S,R)-17**

| Atom | U <sub>11</sub> | U <sub>22</sub> | U <sub>33</sub> | U <sub>23</sub> | U <sub>13</sub> | U <sub>12</sub> |
|------|-----------------|-----------------|-----------------|-----------------|-----------------|-----------------|
| C1   | 0.0197(6)       | 0.0191(7)       | 0.0191(6)       | 0.0027(5)       | -0.0002(5)      | 0.0031(5)       |
| C2   | 0.0194(6)       | 0.0245(7)       | 0.0231(7)       | 0.0036(6)       | -0.0017(5)      | 0.0030(6)       |
| C3   | 0.0202(7)       | 0.0314(8)       | 0.0254(7)       | 0.0046(6)       | 0.0019(5)       | 0.0011(6)       |
| C4   | 0.0243(7)       | 0.0269(7)       | 0.0241(7)       | 0.0082(6)       | 0.0010(5)       | 0.0013(6)       |
| C5   | 0.0239(7)       | 0.0215(6)       | 0.0160(6)       | 0.0016(5)       | -0.0004(5)      | 0.0022(5)       |
| C6   | 0.0274(7)       | 0.0209(7)       | 0.0258(7)       | -0.0002(6)      | -0.0016(6)      | 0.0049(6)       |
| C7   | 0.0299(8)       | 0.0142(6)       | 0.0300(7)       | 0.0017(5)       | -0.0043(6)      | 0.0016(6)       |
| C8   | 0.0333(8)       | 0.0296(8)       | 0.0310(8)       | 0.0079(6)       | -0.0080(7)      | -0.0071(7)      |
| C9   | 0.0401(10)      | 0.0363(9)       | 0.0375(9)       | 0.0114(7)       | -0.0031(7)      | -0.0123(8)      |
| C10  | 0.0313(8)       | 0.0271(8)       | 0.0501(10)      | 0.0055(7)       | -0.0051(7)      | -0.0059(7)      |
| C11  | 0.0350(9)       | 0.0271(8)       | 0.0443(9)       | -0.0015(7)      | -0.0159(8)      | 0.0006(7)       |
| C12  | 0.0370(8)       | 0.0254(7)       | 0.0286(7)       | -0.0020(6)      | -0.0073(6)      | 0.0030(7)       |
| C13  | 0.0248(7)       | 0.0241(7)       | 0.0216(6)       | 0.0012(5)       | -0.0027(5)      | 0.0036(6)       |
| C14  | 0.0257(7)       | 0.0228(7)       | 0.0227(6)       | 0.0029(5)       | -0.0033(6)      | -0.0002(6)      |
| C15  | 0.0374(9)       | 0.0277(8)       | 0.0299(8)       | 0.0032(6)       | -0.0086(7)      | 0.0072(7)       |
| C16  | 0.0174(6)       | 0.0241(7)       | 0.0191(6)       | -0.0006(5)      | 0.0002(5)       | 0.0017(5)       |
| C17  | 0.0249(7)       | 0.0192(7)       | 0.0259(7)       | 0.0000(6)       | 0.0026(6)       | 0.0009(6)       |
| C18  | 0.0212(7)       | 0.0242(7)       | 0.0269(7)       | -0.0026(6)      | 0.0021(5)       | -0.0056(6)      |
| C19  | 0.0199(7)       | 0.0280(8)       | 0.0229(7)       | -0.0047(6)      | 0.0027(5)       | 0.0014(6)       |
| C20  | 0.0237(7)       | 0.0219(7)       | 0.0283(7)       | -0.0032(6)      | 0.0013(6)       | 0.0043(6)       |
| C21  | 0.0224(7)       | 0.0195(7)       | 0.0276(7)       | -0.0045(6)      | 0.0013(5)       | -0.0009(5)      |
| C22  | 0.0199(7)       | 0.0324(8)       | 0.0435(9)       | -0.0072(7)      | -0.0021(6)      | 0.0023(6)       |
| N1   | 0.0202(5)       | 0.0178(5)       | 0.0174(5)       | 0.0014(4)       | 0.0004(4)       | 0.0038(4)       |
| O1   | 0.0203(5)       | 0.0385(7)       | 0.0437(7)       | 0.0121(5)       | 0.0020(5)       | -0.0009(5)      |
| O2   | 0.0328(6)       | 0.0268(5)       | 0.0201(5)       | -0.0003(4)      | -0.0050(4)      | 0.0054(4)       |
| O3   | 0.0219(5)       | 0.0215(5)       | 0.0316(5)       | -0.0038(4)      | -0.0039(4)      | -0.0001(4)      |
| O4   | 0.0290(5)       | 0.0315(5)       | 0.0198(5)       | 0.0020(4)       | 0.0009(4)       | 0.0080(5)       |
| S1   | 0.01822(15)     | 0.01961(15)     | 0.01917(15)     | -0.00105(12)    | -0.00133(12)    | 0.00166(13)     |

The form of the anisotropic displacement parameter is:

$$\exp[-2\pi^2(a^2U_{11}h^2+b^2U_{22}k^2+c^2U_{33}l^2+2b^*c^*U_{23}kl+2a^*c^*U_{13}hl+2a^*b^*U_{12}hk)]$$

**Table 5. Bond Distances in Compound (S,S,S,R)-17, Å**

|         |            |         |            |         |            |
|---------|------------|---------|------------|---------|------------|
| C1-N1   | 1.4964(17) | C1-C6   | 1.5314(19) | C1-C2   | 1.5371(19) |
| C2-C3   | 1.5260(19) | C3-O1   | 1.4229(18) | C3-C4   | 1.518(2)   |
| C4-C5   | 1.527(2)   | C5-N1   | 1.4976(16) | C5-C13  | 1.5311(19) |
| C6-C7   | 1.508(2)   | C7-C12  | 1.391(2)   | C7-C8   | 1.395(2)   |
| C8-C9   | 1.382(2)   | C9-C10  | 1.388(2)   | C10-C11 | 1.387(3)   |
| C11-C12 | 1.380(3)   | C13-C14 | 1.5189(19) | C14-O2  | 1.4376(17) |
| C14-C15 | 1.520(2)   | C16-C17 | 1.382(2)   | C16-C21 | 1.387(2)   |
| C16-S1  | 1.7669(14) | C17-C18 | 1.393(2)   | C18-C19 | 1.392(2)   |
| C19-C20 | 1.397(2)   | C19-C22 | 1.507(2)   | C20-C21 | 1.386(2)   |
| N1-S1   | 1.6366(11) | O3-S1   | 1.4376(10) | O4-S1   | 1.4445(10) |
| C1'-N1' | 1.4985(17) | C1'-C6' | 1.533(2)   | C1'-C2' | 1.535(2)   |

**Table 6. Bond Angles in Compound (S,S,S,R)-17, °**

|             |            |             |            |             |            |
|-------------|------------|-------------|------------|-------------|------------|
| N1-C1-C6    | 110.16(11) | N1-C1-C2    | 110.94(11) | C6-C1-C2    | 115.33(12) |
| C3-C2-C1    | 113.74(11) | O1-C3-C4    | 106.24(12) | O1-C3-C2    | 111.59(12) |
| C4-C3-C2    | 110.78(12) | C3-C4-C5    | 112.58(12) | N1-C5-C4    | 110.58(11) |
| N1-C5-C13   | 113.08(11) | C4-C5-C13   | 113.13(12) | C7-C6-C1    | 111.54(12) |
| C12-C7-C8   | 117.78(15) | C12-C7-C6   | 122.54(14) | C8-C7-C6    | 119.64(13) |
| C9-C8-C7    | 121.20(15) | C8-C9-C10   | 120.31(17) | C9-C10-C11  | 118.95(16) |
| C12-C11-C10 | 120.47(15) | C11-C12-C7  | 121.24(16) | C14-C13-C5  | 114.55(12) |
| O2-C14-C15  | 110.99(12) | O2-C14-C13  | 107.14(11) | C15-C14-C13 | 110.47(12) |
| C17-C16-C21 | 121.51(13) | C17-C16-S1  | 120.20(11) | C21-C16-S1  | 118.29(11) |
| C16-C17-C18 | 118.87(14) | C19-C18-C17 | 120.93(14) | C18-C19-C20 | 118.74(13) |
| C18-C19-C22 | 121.15(14) | C20-C19-C22 | 120.10(14) | C21-C20-C19 | 120.97(14) |
| C20-C21-C16 | 118.96(14) | C5-N1-C1    | 113.53(10) | C5-N1-S1    | 119.78(9)  |
| C1-N1-S1    | 116.06(9)  | O3-S1-O4    | 117.19(6)  | O3-S1-N1    | 112.70(6)  |
| O4-S1-N1    | 106.02(6)  | O3-S1-C16   | 107.61(6)  | O4-S1-C16   | 107.33(6)  |
| N1-S1-C16   | 105.25(6)  | N1'-C1'-C6' | 109.87(11) | N1'-C1'-C2' | 110.25(12) |
